# Supplementary material for: Coverage and quality of DNA barcode references for Central and Northern European Odonata
Source: PeerJ journal article supplement (doi:10.7717/peerj.11192), 2021-05-03
Supplement: suppl_file_S1.pdf [file suppl_file_S1.pdf]

| GenBank # | Process ID   | Sample ID          | BIN          | Seq. Length | Collection Date | Identification         | Life Stage | Institution (short) | Identifier            | country; GPS              |
|-----------|--------------|--------------------|--------------|-------------|-----------------|------------------------|------------|---------------------|-----------------------|---------------------------|
| HM422047  | FBAQU308-09  | BC ZSM AQU 00308   | BOLD:AAJ5779 | 658[0n]     | 19-Aug-2009     | <i>Aeshna affinis</i>  | adult      | SNSB-ZSM            | M. Schoen             | Germany; 48.366, 11.875   |
| MW490495  | PLSW064-20   | ODOPL_198          | BOLD:AAJ5779 | 658[0n]     | 25-Aug-2019     | <i>Aeshna affinis</i>  | adult      | Lodz                | Grzegorz Tonczyk      | Poland; 51.757, 19.4      |
| MW490196  | PLSW065-20   | ODOPL_199          | BOLD:AAJ5779 | 658[0n]     | 25-Aug-2019     | <i>Aeshna affinis</i>  | adult      | Lodz                | Grzegorz Tonczyk      | Poland; 51.757, 19.4      |
| MW490475  | RODI021-20   | ROAE-AA-1          | BOLD:AAJ5779 | 658[0n]     | 18-Jul-2017     | <i>Aeshna affinis</i>  | adult      | Babes-Bolyai        | Beata Nagy            | Romania; 47.843, 23.27    |
| MW490399  | RODI022-20   | ROAE-AA-2          | BOLD:AAJ5779 | 658[0n]     | 18-Jul-2017     | <i>Aeshna affinis</i>  | adult      | Babes-Bolyai        | Beata Nagy            | Romania; 47.843, 23.27    |
| MW490232  | EDF016-18    | Odon416            | BOLD:AAA6531 | 639[0n]     | 23-Aug-2018     | <i>Aeshna caerulea</i> | adult      | NHMW                | Lukas Zangl           | Austria; 47.288, 13.659   |
| MW490272  | EDF017-18    | Odon417            | BOLD:AAA6531 | 658[0n]     | 23-Aug-2018     | <i>Aeshna caerulea</i> | adult      | NHMW                | Lukas Zangl           | Austria; 47.291, 13.66    |
| MW490172  | TRDOD058-14  | TRD-ODO76          | BOLD:AAA6531 | 658[0n]     | 08-Sep-2010     | <i>Aeshna caerulea</i> | adult      | NTNU                | Jon K. Skei           | Norway; 63.325, 10.652    |
| MW490352  | TRDOD067-14  | TRD-ODO85          | BOLD:AAA6531 | 658[0n]     | 03-Aug-2010     | <i>Aeshna caerulea</i> | adult      | NTNU                | Jon K. Skei           | Norway; 63.498, 11.23     |
| MW490283  | TRDOD036-14  | TRD-ODO54          | BOLD:AAA6531 | 658[0n]     | 19-Jul-2014     | <i>Aeshna caerulea</i> | adult      | NTNU                | Jon K. Skei           | Norway; 63.543, 11.033    |
| MW490109  | GBMIX941-14  | GBOL10043          | BOLD:ACI1053 | 658[0n]     | 23-Jul-2014     | <i>Aeshna cyanea</i>   |            | SNSB-ZSM            | Emmanuel FA Toussaint | France; 48.639, 0.085     |
| MW490148  | GBODO010-18  | GBOL_20133         | BOLD:ACI1053 | 658[6n]     | 27-Jul-2018     | <i>Aeshna cyanea</i>   | adult      | SNSB-ZSM            | Stefan Koch           | Germany; 47.9229, 11.5085 |
| MW490364  | GBMIX3763-18 | GBOL19831          | BOLD:ACI1053 | 663[2n]     | 24-Sep-2017     | <i>Aeshna cyanea</i>   | adult      | SNSB-ZSM            | Lars Hendrich         | Germany; 48.0216, 10.3358 |
| MW490245  | GBMIX2219-15 | GBOL13668          | BOLD:ACI1053 | 658[0n]     | 26-Aug-2013     | <i>Aeshna cyanea</i>   | adult      | SNSB-ZSM            | Jerome Moriniere      | Germany; 50.4707, 7.22338 |
| MW490372  | PLSW129-20   | ODOPL_227          | BOLD:ACI1053 | 658[0n]     | 30-Jun-2019     | <i>Aeshna cyanea</i>   | larvae     | Lodz                | Grzegorz Tonczyk      | Poland; 54.612, 18.51     |
| MW490429  | PLSW130-20   | ODOPL_228          | BOLD:ACI1053 | 658[0n]     | 30-Jun-2019     | <i>Aeshna cyanea</i>   | larvae     | Lodz                | Grzegorz Tonczyk      | Poland; 54.612, 18.51     |
| MW490539  | PLSW131-20   | ODOPL_229          | BOLD:ACI1053 | 658[0n]     | 30-Jun-2019     | <i>Aeshna cyanea</i>   | larvae     | Lodz                | Grzegorz Tonczyk      | Poland; 54.612, 18.51     |
| HM901857  | FBAQU478-10  | BC ZSM AQU 00383   | BOLD:AAJ5811 | 619[0n]     | 16-Jul-2009     | <i>Aeshna grandis</i>  | adult      | SNSB-ZSM            | S. V. Ober            | Germany; 47.908, 11.523   |
| MW490538  | GBODO066-18  | GBOL_20189         | BOLD:AAJ5811 | 658[1n]     | 04-Jul-2018     | <i>Aeshna grandis</i>  | adult      | SNSB-ZSM            | Stefan Koch           | Germany; 48.3305, 11.8047 |
| MW490355  | ZMBN005-15   | Kurs2015-MH5       | BOLD:AAJ5811 | 658[0n]     | 19-Aug-2015     | <i>Aeshna grandis</i>  | adult      | Bergen              | Steffen Roth          | Norway; 60.333, 5.359     |
| MW490265  | TRDOD038-14  | TRD-ODO56          | BOLD:AAJ5811 | 658[0n]     | 22-Jul-2014     | <i>Aeshna grandis</i>  | adult      | NTNU                | Jon K. Skei           | Norway; 63.548, 10.996    |
| MW490517  | TRDOD039-14  | TRD-ODO57          | BOLD:AAJ5811 | 658[0n]     | 22-Jul-2014     | <i>Aeshna grandis</i>  | adult      | NTNU                | Jon K. Skei           | Norway; 63.548, 10.996    |
| MW490273  | TRDOD040-14  | TRD-ODO58          | BOLD:AAJ5811 | 658[0n]     | 22-Jul-2014     | <i>Aeshna grandis</i>  | adult      | NTNU                | Jon K. Skei           | Norway; 63.548, 10.996    |
| MW490130  | TRDOD033-14  | TRD-ODO51          | BOLD:AAJ5811 | 658[0n]     | 14-Jul-2014     | <i>Aeshna grandis</i>  | adult      | NTNU                | Jon K. Skei           | Norway; 63.653, 11.093    |
| MW490309  | ODOPL064-19  | OdoPL64            | BOLD:AAJ5811 | 637[0n]     | 02-Nov-2018     | <i>Aeshna grandis</i>  | larvae     | Lodz                | Grzegorz Tonczyk      | Poland; 51.3338, 19.8961  |
| MW490417  | ODOPL066-19  | OdoPL66            | BOLD:AAJ5811 | 635[0n]     | 02-Nov-2018     | <i>Aeshna grandis</i>  | larvae     | Lodz                | Grzegorz Tonczyk      | Poland; 51.3338, 19.8961  |
| MW490237  | EDF001-18    | NOaS1-2019_Odo0029 | BOLD:ADC2941 | 658[0n]     | 31-May-2017     | <i>Aeshna isoceles</i> | adult      | NHMW                | Iris Fischer          | Austria; ,                |
| MW490521  | EDF002-18    | NOaS1-2019_Odo0053 | BOLD:ADC2941 | 658[0n]     | 01-Jun-2017     | <i>Aeshna isoceles</i> | adult      | NHMW                | Iris Fischer          | Austria; ,                |
| MW490288  | GBODO007-18  | GBOL_20130         | BOLD:ADC2941 | 658[0n]     | 21-May-2018     | <i>Aeshna isoceles</i> | adult      | SNSB-ZSM            | Stefan Koch           | Germany; 47.7561, 11.3698 |
| MW490325  | GBODO143-18  | GBOL_20266         | BOLD:ADC2941 | 658[0n]     | 21-May-2018     | <i>Aeshna isoceles</i> | adult      | SNSB-ZSM            | Stefan Koch           | Germany; 47.7561, 11.3698 |
| MW490370  | PLSW077-20   | ODOPL_211          | BOLD:ADC2941 | 654[0n]     | 02-Jun-2019     | <i>Aeshna isoceles</i> | adult      | Lodz                | Grzegorz Tonczyk      | Poland; 51.551, 19.338    |
| MW490312  | GBEPT2003-14 | GBOL09395          | BOLD:AAJ1281 | 658[0n]     | 02-Jul-2014     | <i>Aeshna juncea</i>   | larvae     | SNSB-ZSM            | Sofia Wiedenbrug      | Germany; 47.506, 12.967   |
| MW490104  | FBAQU1431-13 | GBOL00275          | BOLD:AAJ1281 | 620[0n]     | 23-Aug-2011     | <i>Aeshna juncea</i>   | adult      | SNSB-ZSM            | Stefan Koch           | Germany; 47.6291, 11.1893 |
| MW490419  | GBODO013-18  | GBOL_20136         | BOLD:AAJ1281 | 530[1n]     | 27-Jul-2018     | <i>Aeshna juncea</i>   | adult      | SNSB-ZSM            | Stefan Koch           | Germany; 47.8252, 11.3012 |
| MW490477  | GBODO009-18  | GBOL_20132         | BOLD:AAJ1281 | 658[4n]     | 27-Jul-2018     | <i>Aeshna juncea</i>   | adult      | SNSB-ZSM            | Stefan Koch           | Germany; 47.9229, 11.5085 |
| HM901858  | FBAQU479-10  | BC ZSM AQU 00384   | BOLD:AAJ1281 | 633[0n]     | 27-Jul-2009     | <i>Aeshna juncea</i>   | adult      | SNSB-ZSM            | S. V. Ober            | Germany; 48.107, 11.458   |
| MW490396  | TRDOD034-14  | TRD-ODO52          | BOLD:AAJ1281 | 609[0n]     | 12-Jul-2014     | <i>Aeshna juncea</i>   | adult      | NTNU                | Jon K. Skei           | Norway; 63.541, 11.033    |
| MW490188  | TRDOD035-14  | TRD-ODO53          | BOLD:AAJ1281 | 658[0n]     | 12-Jul-2014     | <i>Aeshna juncea</i>   | adult      | NTNU                | Jon K. Skei           | Norway; 63.541, 11.033    |
| MW490305  | TRDOD041-14  | TRD-ODO59          | BOLD:AAJ1281 | 658[0n]     | 19-Jul-2014     | <i>Aeshna juncea</i>   | adult      | NTNU                | Jon K. Skei           | Norway; 63.541, 11.033    |
| MW490448  | TRDOD037-14  | TRD-ODO55          | BOLD:AAJ1281 | 658[0n]     | 22-Jul-2014     | <i>Aeshna juncea</i>   | adult      | NTNU                | Jon K. Skei           | Norway; 63.548, 10.996    |
| HM901884  | FBAQU522-10  | BC ZSM AQU 00427   | BOLD:AAJ5810 | 628[0n]     | 09-Jan-2009     | <i>Aeshna mixta</i>    | adult      | SNSB-ZSM            | F. Weihrauch          | Germany; 47.895, 12.167   |

| GenBank # | Process ID    | Sample ID        | BIN          | Seq. Length | Collection Date | Identification                | Life Stage | Institution (short) | Identifier         | country; GPS                |
|-----------|---------------|------------------|--------------|-------------|-----------------|-------------------------------|------------|---------------------|--------------------|-----------------------------|
| MW490236  | FBAQU480-10   | BC ZSM AQU 00385 | BOLD:AAJ5810 | 554[0n]     | 24-Aug-2009     | <i>Aeshna mixta</i>           | adult      | SNSB-ZSM            | S. V. Ober         | Germany; 48.177, 11.384     |
| MW490375  | GODO046-19    | ZFMK-TIS-2616217 | BOLD:AAJ5810 | 658[0n]     | 23-Oct-2018     | <i>Aeshna mixta</i>           | adult      | Udo Rothe           | Udo Rothe          | Italy; 41.0228, 9.42699     |
| MW490185  | GODO045-19    | ZFMK-TIS-2616216 | BOLD:AAJ5810 | 658[0n]     | 22-Oct-2018     | <i>Aeshna mixta</i>           | adult      | Udo Rothe           | Udo Rothe          | Italy; 41.1237, 9.3061      |
| KU180298  | GBMIN88537-17 | KU180298         | BOLD:ABZ5296 | 603[0n]     |                 | <i>Aeshna subarctica</i>      |            | GenBank, NCBI       |                    | 0 Germany; ,                |
| MW490481  | GBODO043-18   | GBOL 20166       | BOLD:ABZ5296 | 658[0n]     | 05-Sep-2018     | <i>Aeshna subarctica</i>      | adult      | SNSB-ZSM            | Stefan Koch        | Germany; 47.6668, 11.0506   |
| MW490450  | GBODO045-18   | GBOL 20168       | BOLD:ABZ5296 | 658[2n]     | 05-Sep-2018     | <i>Aeshna subarctica</i>      | adult      | SNSB-ZSM            | Stefan Koch        | Germany; 47.6668, 11.0506   |
| MW490403  | GBODO048-18   | GBOL 20171       | BOLD:ABZ5296 | 658[0n]     | 05-Sep-2018     | <i>Aeshna subarctica</i>      | adult      | SNSB-ZSM            | Stefan Koch        | Germany; 47.6668, 11.0506   |
| HM901883  | FBAQU521-10   | BC ZSM AQU 00426 | BOLD:ABZ5296 | 625[0n]     | 16-Jul-2009     | <i>Aeshna subarctica</i>      | adult      | SNSB-ZSM            | F. Weihrauch       | Germany; 47.895, 12.167     |
| MW490090  | TRDOD069-14   | TRD-ODO87        | BOLD:ABZ5296 | 658[0n]     | 25-Aug-2014     | <i>Aeshna subarctica</i>      | adult      | NTNU                | Jon K. Skei        | Norway; 63.355, 10.824      |
| MW490291  | TRDOD062-14   | TRD-ODO80        | BOLD:ABZ5296 | 658[0n]     | 15-Aug-2009     | <i>Aeshna subarctica</i>      | adult      | NTNU                | Jon K. Skei        | Norway; 63.395, 11.806      |
| MW490195  | TRDOD050-14   | TRD-ODO68        | BOLD:ABZ5296 | 658[0n]     | 02-Aug-2014     | <i>Aeshna subarctica</i>      | adult      | NTNU                | Jon K. Skei        | Norway; 63.543, 11.033      |
| MW490221  | TRDOD056-14   | TRD-ODO74        | BOLD:ABZ5296 | 658[0n]     | 11-Aug-2014     | <i>Aeshna subarctica</i>      | adult      | NTNU                | Jon K. Skei        | Norway; 63.555, 11.099      |
| KU180300  | GBMIN88540-17 | KU180300         | BOLD:ADC2700 | 603[0n]     |                 | <i>Aeshna viridis</i>         |            | GenBank, NCBI       |                    | 0 Germany; ,                |
| KU180301  | GBMIN88539-17 | KU180301         | BOLD:ADC2700 | 603[3n]     |                 | <i>Aeshna viridis</i>         |            | GenBank, NCBI       |                    | 0 Germany; ,                |
| MT298251  | ZPLOC042-20   | MIB:ZPL:07842    | BOLD:ACH7840 | 658[0n]     |                 | <i>Anax ephippiger</i>        | adult      | Milano Bicocca      | Giacomo Assandri   | Italy; 44.4, 8.8            |
| MT298252  | ZPLOC044-20   | MIB:ZPL:07844    | BOLD:ACH7840 | 658[0n]     |                 | <i>Anax ephippiger</i>        | adult      | Giacomo Assandri    | Giacomo Assandri   | Italy; 45.2, 8.7            |
| MW490464  | GBODO126-18   | GBOL 20249       | BOLD:ABX6596 | 658[0n]     | 27-Jun-2018     | <i>Anax imperator</i>         | adult      | SNSB-ZSM            | Stefan Koch        | Germany; 47.7852, 11.3619   |
| MW490466  | GBODO128-18   | GBOL 20251       | BOLD:ABX6596 | 658[0n]     | 27-Jun-2018     | <i>Anax imperator</i>         | adult      | SNSB-ZSM            | Stefan Koch        | Germany; 47.7852, 11.3619   |
| MW490140  | GBODO012-18   | GBOL 20135       | BOLD:ABX6596 | 658[1n]     | 27-Jul-2018     | <i>Anax imperator</i>         | adult      | SNSB-ZSM            | Stefan Koch        | Germany; 47.9229, 11.5085   |
| HM901859  | FBAQU481-10   | BC ZSM AQU 00386 | BOLD:ABX6596 | 611[0n]     | 18-Jun-2009     | <i>Anax imperator</i>         | adult      | SNSB-ZSM            | S. V. Ober         | Germany; 48.236, 11.505     |
| MW490125  | GBODO094-18   | GBOL 20217       | BOLD:ABX6596 | 657[0n]     | 04-Jul-2018     | <i>Anax imperator</i>         | adult      | SNSB-ZSM            | Stefan Koch        | Germany; 48.3115, 11.9189   |
| MW490299  | GBODO082-18   | GBOL 20205       | BOLD:ABX6596 | 514[1n]     | 04-Jul-2018     | <i>Anax imperator</i>         | adult      | SNSB-ZSM            | Stefan Koch        | Germany; 48.3305, 11.8047   |
| MN731357  | ODOPL085-19   | OdoPL85          | BOLD:ABX6596 | 637[0n]     | 02-Nov-2018     | <i>Anax imperator</i>         | larvae     | Lodz                | Grzegorz Tonczyk   | Poland; 51.3164, 19.9037    |
| MN731359  | ODOPL118-19   | OdoPL118         | BOLD:ABX6596 | 637[0n]     | 17-Nov-2018     | <i>Anax imperator</i>         | larvae     | Lodz                | Grzegorz Tonczyk   | Poland; 51.5799, 19.2154    |
| MN731358  | ODOPL119-19   | OdoPL119         | BOLD:ABX6596 | 636[0n]     | 17-Nov-2018     | <i>Anax imperator</i>         | larvae     | Lodz                | Grzegorz Tonczyk   | Poland; 51.5799, 19.2154    |
| MW490509  | PLSW120-20    | ODOPL_225        | BOLD:ABX6596 | 658[0n]     | 10-Apr-2019     | <i>Anax imperator</i>         | larvae     | Lodz                | Grzegorz Tonczyk   | Poland; 51.58, 19.215       |
| MN731356  | ODOPL025-19   | OdoPL25          | BOLD:ABX6596 | 634[0n]     | 14-Oct-2018     | <i>Anax imperator</i>         | larvae     | Lodz                | Grzegorz Tonczyk   | Poland; 51.5814, 19.2188    |
| MW490490  | PLSW054-20    | ODOPL_188        | BOLD:ABX6596 | 658[0n]     | 09-Jun-2019     | <i>Anax imperator</i>         | adult      | Lodz                | Grzegorz Tonczyk   | Poland; 51.758, 19.407      |
| MW490451  | EDF019-19     | Odon200          | BOLD:ABX6596 | 658[0n]     | 05-Jun-2018     | <i>Anax parthenope</i>        | adult      | NHMMW               | Stephan Koblmüller | Austria; 47.76, 16.808      |
| MN701501  | ODOPL132-19   | ODOPL132         | BOLD:ABX6596 | 671[0n]     | 10-Jun-2019     | <i>Anax parthenope</i>        | adult      | Lodz                | Grzegorz Tonczyk   | Poland; 54.0263, 23.0665    |
| MN701506  | ODOPL133-19   | ODOPL133         | BOLD:ABX6596 | 671[0n]     | 10-Jun-2019     | <i>Anax parthenope</i>        | adult      | Lodz                | Grzegorz Tonczyk   | Poland; 54.0263, 23.0665    |
| MN701514  | ODOPL134-19   | ODOPL134         | BOLD:ABX6596 | 603[0n]     | 10-Jun-2019     | <i>Anax parthenope</i>        | adult      | Lodz                | Grzegorz Tonczyk   | Poland; 54.0286, 23.0527    |
| MW490145  | GODO005-18    | ZFMK-TIS-2561818 | BOLD:ABX6596 | 658[0n]     | 11-Aug-2015     | <i>Anax sp.</i>               | larvae     | ZFMK                |                    | 0 Hungary; 47.6787, 16.8479 |
| MW490368  | GODO006-18    | ZFMK-TIS-2561820 | BOLD:ABX6596 | 658[0n]     | 11-Aug-2015     | <i>Anax sp.</i>               | larvae     | ZFMK                |                    | 0 Hungary; 47.6787, 16.8479 |
| MW490313  | GODO039-18    | ZFMK-TIS-2554164 | BOLD:ADN2163 | 658[0n]     | 16-Jun-2011     | <i>Boyeria irene</i>          |            | ZFMK                | Armin W. Lorenz    | France; ,                   |
| MT298270  | ZPLOC075-20   | MIB:ZPL:07875    | BOLD:ABA9406 | 658[0n]     |                 | <i>Brachythemis impartita</i> | adult      | Milano Bicocca      | Giacomo Assandri   | Italy; 37.5, 14.9           |
| MT298271  | ZPLOC073-20   | MIB:ZPL:07873    | BOLD:ABA9406 | 658[0n]     |                 | <i>Brachythemis impartita</i> | adult      | Giacomo Assandri    | Giacomo Assandri   | Italy; 39.9, 8.5            |
| MT298269  | ZPLOC072-20   | MIB:ZPL:07872    | BOLD:ABA9406 | 658[0n]     |                 | <i>Brachythemis impartita</i> | adult      | Giacomo Assandri    | Giacomo Assandri   | Italy; 40.7, 9              |
| MW490174  | GBEPT945-14   | GBOL05515        | BOLD:ACI1765 | 658[0n]     | 13-Jun-2014     | <i>Brachytron pratense</i>    | adult      | SNSB-ZSM            | Michael Franzen    | Austria; 47.931, 16.746     |
| MW490212  | GBEPT946-14   | GBOL05516        | BOLD:ACI1765 | 658[0n]     | 13-Jun-2014     | <i>Brachytron pratense</i>    | adult      | SNSB-ZSM            | Michael Franzen    | Austria; 47.931, 16.746     |
| MW490502  | GBUPS282-14   | GBOL02932        | BOLD:ACI1765 | 610[2n]     |                 | <i>Brachytron pratense</i>    | adult      | SNSB-ZSM            | Lars Hendrich      | Germany; ,                  |

| GenBank # | Process ID  | Sample ID        | BIN          | Seq. Length | Collection Date | Identification                    | Life Stage | Institution (short) | Identifier              | country; GPS              |
|-----------|-------------|------------------|--------------|-------------|-----------------|-----------------------------------|------------|---------------------|-------------------------|---------------------------|
| MW490323  | GBODO142-18 | GBOL_20265       | BOLD:ACI1765 | 658[0n]     | 21-May-2018     | <i>Brachytron pratense</i>        | adult      | SNSB-ZSM            | Stefan Koch             | Germany; 47.7561, 11.3698 |
| MW490259  | GBODO149-18 | GBOL_20272       | BOLD:ACI1765 | 658[0n]     | 21-May-2018     | <i>Brachytron pratense</i>        | adult      | SNSB-ZSM            | Stefan Koch             | Germany; 47.7561, 11.3698 |
| MW490168  | PLSW135-20  | ODOPL_230        | BOLD:ACI1765 | 658[0n]     | 30-Jun-2019     | <i>Brachytron pratense</i>        | larvae     | Lodz                | Grzegorz Tonczyk        | Poland; 54.626, 18.489    |
| MW490290  | PLSW136-20  | ODOPL_231        | BOLD:ACI1765 | 658[0n]     | 30-Jun-2019     | <i>Brachytron pratense</i>        | larvae     | Lodz                | Grzegorz Tonczyk        | Poland; 54.626, 18.489    |
| MW490216  | PLSW137-20  | ODOPL_232        | BOLD:ACI1765 | 658[0n]     | 30-Jun-2019     | <i>Brachytron pratense</i>        | larvae     | Lodz                | Grzegorz Tonczyk        | Poland; 54.626, 18.489    |
| MT298276  | ZPLOD815-20 | MIB:ZPL:08615    | BOLD:ADC2822 | 658[0n]     |                 | <i>Caliaeschna microstigma</i>    | adult      | Giacomo Assandri    | Giacomo Assandri        | Montenegro; 42.2, 19.1    |
| MW490203  | GODO040-19  | ZFMK-TIS-2616197 | BOLD:ADV2208 | 658[0n]     | 23-Oct-2018     | <i>Calopteryx haemorrhoidalis</i> | adult      | Udo Rothe           | Udo Rothe               | Italy; 41.0228, 9.42699   |
| MW490230  | GODO018-18  | ZFMK-TIS-2008755 | BOLD:ADC4648 | 658[0n]     |                 | <i>Calopteryx splendens</i>       |            | ZFMK                | Sabine Schmidt-Halewicz | Germany; 47.6587, 9.16629 |
| MW490332  | GODO019-18  | ZFMK-TIS-2008756 | BOLD:ADC4648 | 658[0n]     |                 | <i>Calopteryx splendens</i>       |            | ZFMK                | Sabine Schmidt-Halewicz | Germany; 47.6587, 9.16629 |
| MW490432  | GODO020-18  | ZFMK-TIS-2595144 | BOLD:ADC4648 | 658[0n]     |                 | <i>Calopteryx splendens</i>       | larvae     | ZFMK                | Sabine Schmidt-Halewicz | Germany; 49.4121, 11.0182 |
| MW490134  | GODO022-18  | ZFMK-TIS-2010621 | BOLD:ADC4648 | 658[0n]     | 30-May-2017     | <i>Calopteryx splendens</i>       | adult      | ZFMK                | T. Sellmeier            | Germany; 50.777, 7.365    |
| MW490510  | GODO024-18  | ZFMK-TIS-2612900 | BOLD:ADC4648 | 658[0n]     | 30-May-2017     | <i>Calopteryx splendens</i>       | adult      | ZFMK                | T. Sellmeier            | Germany; 50.777, 7.365    |
| MW490124  | GODO025-18  | ZFMK-TIS-2612901 | BOLD:ADC4648 | 658[0n]     | 30-May-2017     | <i>Calopteryx splendens</i>       | adult      | ZFMK                | T. Sellmeier            | Germany; 50.777, 7.365    |
| MW490324  | GODO032-18  | ZFMK-TIS-2010640 | BOLD:ADC4648 | 658[0n]     | 11-Jul-2017     | <i>Calopteryx splendens</i>       | adult      | ZFMK                | T. Sellmeier            | Germany; 50.8, 7.585      |
| MW490199  | GODO033-18  | ZFMK-TIS-2612907 | BOLD:ADC4648 | 658[0n]     | 27-Jun-2017     | <i>Calopteryx splendens</i>       | adult      | ZFMK                | T. Sellmeier            | Germany; 50.8, 7.585      |
| MW490487  | GODO034-18  | ZFMK-TIS-2612908 | BOLD:ADC4648 | 658[0n]     | 27-Jun-2017     | <i>Calopteryx splendens</i>       | adult      | ZFMK                | T. Sellmeier            | Germany; 50.8, 7.585      |
| MW490143  | ODOPL056-19 | OdoPL56          | BOLD:ADC4648 | 634[0n]     | 11-Oct-2018     | <i>Calopteryx splendens</i>       | larvae     | Lodz                | Grzegorz Tonczyk        | Poland; 50.4118, 18.1075  |
| MW490204  | ODOPL057-19 | OdoPL57          | BOLD:ADC4648 | 636[0n]     | 11-Oct-2018     | <i>Calopteryx splendens</i>       | larvae     | Lodz                | Grzegorz Tonczyk        | Poland; 50.4118, 18.1075  |
| MW490397  | ODOPL042-19 | OdoPL42          | BOLD:ADC4648 | 635[0n]     | 10-Oct-2018     | <i>Calopteryx splendens</i>       | larvae     | Lodz                | Grzegorz Tonczyk        | Poland; 51.6184, 16.333   |
| MW490099  | ODOPL043-19 | OdoPL43          | BOLD:ADC4648 | 638[0n]     | 10-Oct-2018     | <i>Calopteryx splendens</i>       | larvae     | Lodz                | Grzegorz Tonczyk        | Poland; 51.6184, 16.333   |
| MW490111  | ODOPL033-19 | OdoPL33          | BOLD:ADC4648 | 638[0n]     | 10-Oct-2018     | <i>Calopteryx splendens</i>       | larvae     | Lodz                | Grzegorz Tonczyk        | Poland; 52.0552, 15.4302  |
| MW490329  | ODOPL034-19 | OdoPL34          | BOLD:ADC4648 | 634[0n]     | 10-Oct-2018     | <i>Calopteryx splendens</i>       | larvae     | Lodz                | Grzegorz Tonczyk        | Poland; 52.0552, 15.4302  |
| MW490433  | ODOPL012-18 | OdoPL12          | BOLD:ADC4648 | 626[0n]     | 05-Oct-2018     | <i>Calopteryx splendens</i>       | larvae     | Lodz                | Grzegorz Tonczyk        | Poland; 52.3855, 20.1954  |
| HM901860  | FBAQU484-10 | BC ZSM AQU 00389 | BOLD:AAE7398 | 601[0n]     | 29-Jul-2009     | <i>Calopteryx virgo</i>           | adult      | SNSB-ZSM            | S. V. Ober              | Germany; 47.765, 12.816   |
| HM901885  | FBAQU526-10 | BC ZSM AQU 00431 | BOLD:AAE7398 | 543[1n]     | 09-May-2009     | <i>Calopteryx virgo</i>           | larvae     | SNSB-ZSM            | Monika Hess             | Germany; 49.128, 11.522   |
| MW459503  | GODO001-18  | ZFMK-TIS-2532522 | BOLD:AAE7398 | 658[0n]     | 22-Jun-2014     | <i>Calopteryx virgo</i>           |            | ZFMK                | Guido Haas              | Germany; 50.8, 7.17       |
| MW490428  | PLSW039-20  | ODOPL_173        | BOLD:AAE7398 | 658[0n]     | 13-Jun-2019     | <i>Calopteryx virgo</i>           | adult      | Lodz                | Grzegorz Tonczyk        | Poland; 54.097, 23.063    |
| MT298297  | ZPLOD124-20 | MIB:ZPL:07924    | BOLD:ADC4648 | 658[0n]     |                 | <i>Calopteryx xanthostoma</i>     | adult      | Milano Bicocca      | Giacomo Assandri        | Italy; 44.1, 8.2          |
| MT298296  | ZPLOD125-20 | MIB:ZPL:07925    | BOLD:ADC4648 | 658[0n]     |                 | <i>Calopteryx xanthostoma</i>     | adult      | Milano Bicocca      | Giacomo Assandri        | Italy; 44.1, 8.2          |
| MT298299  | ZPLOD130-20 | MIB:ZPL:07930    | BOLD:ACH6070 | 658[0n]     |                 | <i>Ceriatrigon tenellum</i>       | adult      | Milano Bicocca      | Giacomo Assandri        | Italy; 37.1, 15.3         |
| MT298303  | ZPLOD134-20 | MIB:ZPL:07934    | BOLD:ACH6070 | 658[0n]     |                 | <i>Ceriatrigon tenellum</i>       | adult      | Milano Bicocca      | Giacomo Assandri        | Italy; 40.2, 18.4         |
| MT298301  | ZPLOD127-20 | MIB:ZPL:07927    | BOLD:ACH6070 | 658[0n]     |                 | <i>Ceriatrigon tenellum</i>       | adult      | Milano Bicocca      | Giacomo Assandri        | Italy; 40.4, 8.6          |
| MT298304  | ZPLOD140-20 | MIB:ZPL:07940    | BOLD:ACH6070 | 658[0n]     |                 | <i>Ceriatrigon tenellum</i>       | adult      | Milano Bicocca      | Giacomo Assandri        | Italy; 41.5, 13.1         |
| MT298298  | ZPLOD138-20 | MIB:ZPL:07938    | BOLD:ACH6070 | 658[0n]     |                 | <i>Ceriatrigon tenellum</i>       | adult      | Milano Bicocca      | Giacomo Assandri        | Italy; 44.5, 7.7          |
| MT298302  | ZPLOD135-20 | MIB:ZPL:07935    | BOLD:ACH6070 | 658[0n]     |                 | <i>Ceriatrigon tenellum</i>       | adult      | Milano Bicocca      | Giacomo Assandri        | Italy; 45.8, 9.2          |
| MT298300  | ZPLOD129-20 | MIB:ZPL:07929    | BOLD:ACH6070 | 658[0n]     |                 | <i>Ceriatrigon tenellum</i>       | adult      | Milano Bicocca      | Giacomo Assandri        | Italy; 45.9, 13.2         |
| MW490121  | EDF018-18   | Odon454          | BOLD:ADR7794 | 658[0n]     | 18-Sep-2018     | <i>Chalcolestes parvidens</i>     | adult      | NHMW                | Lukas Zangl             | Austria; 47.71, 16.887    |
| MT298308  | ZPLOD141-20 | MIB:ZPL:07941    | BOLD:ADR7794 | 658[0n]     |                 | <i>Chalcolestes parvidens</i>     | adult      | Milano Bicocca      | Giacomo Assandri        | Italy; 42.6, 12.2         |
| MT298309  | ZPLOD147-20 | MIB:ZPL:07947    | BOLD:ADR7794 | 658[0n]     |                 | <i>Chalcolestes parvidens</i>     | adult      | Milano Bicocca      | Giacomo Assandri        | Italy; 44.6, 11.1         |
| MT298310  | ZPLOD142-20 | MIB:ZPL:07942    | BOLD:ADR7794 | 658[0n]     |                 | <i>Chalcolestes parvidens</i>     | adult      | Milano Bicocca      | Giacomo Assandri        | Italy; 45.6, 13.8         |
| MT298311  | ZPLOD143-20 | MIB:ZPL:07943    | BOLD:ADR7794 | 658[0n]     |                 | <i>Chalcolestes parvidens</i>     | adult      | Milano Bicocca      | Giacomo Assandri        | Italy; 45.8, 13.6         |

| GenBank # | Process ID   | Sample ID        | BIN          | Seq. Length | Collection Date | Identification                 | Life Stage | Institution (short) | Identifier       | country; GPS             |
|-----------|--------------|------------------|--------------|-------------|-----------------|--------------------------------|------------|---------------------|------------------|--------------------------|
| GU682188  | FBAQU201-09  | BC ZSM AQU 00201 | BOLD:AAI7225 | 655[0n]     | 31-Jul-2009     | <i>Chalcolestes viridis</i>    | larvae     | SNSB-ZSM            | Monika Hess      | Germany; 47.731, 11.312  |
| MW490416  | GBCOU7598-14 | GBOL10430        | BOLD:AAI7225 | 658[0n]     | 23-Jul-2014     | <i>Chalcolestes viridis</i>    | adult      | SNSB-ZSM            | Michael Franzen  | Germany; 48.386, 11.82   |
| GU682190  | FBAQU200-09  | BC ZSM AQU 00200 | BOLD:AAI7225 | 623[0n]     | 22-Jun-2009     | <i>Chalcolestes viridis</i>    | larvae     | SNSB-ZSM            | Monika Hess      | Germany; 49.032, 10.369  |
| MT298319  | ZPLOD179-20  | MIB:ZPL:07979    | BOLD:AAI7225 | 658[0n]     |                 | <i>Chalcolestes viridis</i>    | adult      | Milano Bicocca      | Giacomo Assandri | Italy; 37.9, 14.9        |
| MT298313  | ZPLOD164-20  | MIB:ZPL:07964    | BOLD:AAI7225 | 658[0n]     |                 | <i>Chalcolestes viridis</i>    | adult      | Milano Bicocca      | Giacomo Assandri | Italy; 39.4, 8.7         |
| MT298314  | ZPLOD165-20  | MIB:ZPL:07965    | BOLD:AAI7225 | 658[0n]     |                 | <i>Chalcolestes viridis</i>    | adult      | Giacomo Assandri    | Giacomo Assandri | Italy; 40.3, 9.5         |
| MT298315  | ZPLOD167-20  | MIB:ZPL:07967    | BOLD:AAI7225 | 658[0n]     |                 | <i>Chalcolestes viridis</i>    | adult      | Milano Bicocca      | Giacomo Assandri | Italy; 40.9, 16.4        |
| MT298312  | ZPLOD168-20  | MIB:ZPL:07968    | BOLD:ADR7794 | 658[0n]     |                 | <i>Chalcolestes viridis</i>    | adult      | Milano Bicocca      | Giacomo Assandri | Italy; 40.9, 16.4        |
| MT298317  | ZPLOD174-20  | MIB:ZPL:07974    | BOLD:AAI7225 | 658[0n]     |                 | <i>Chalcolestes viridis</i>    | adult      | Milano Bicocca      | Giacomo Assandri | Italy; 42.9, 12.3        |
| MT298320  | ZPLOD181-20  | MIB:ZPL:07981    | BOLD:AAI7225 | 658[0n]     |                 | <i>Chalcolestes viridis</i>    | adult      | Milano Bicocca      | Giacomo Assandri | Italy; 45.7, 8.9         |
| MT298318  | ZPLOD177-20  | MIB:ZPL:07977    | BOLD:AAI7225 | 658[0n]     |                 | <i>Chalcolestes viridis</i>    | adult      | Milano Bicocca      | Giacomo Assandri | Italy; 45.8, 13.1        |
| MT298316  | ZPLOD173-20  | MIB:ZPL:07973    | BOLD:AAI7225 | 658[0n]     |                 | <i>Chalcolestes viridis</i>    | adult      | Milano Bicocca      | Giacomo Assandri | Italy; 45.9, 11.1        |
| MW490529  | TRDOD016-14  | TRD-ODO34        | BOLD:ACP7016 | 658[0n]     | 05-Jun-2014     | <i>Coenagrion armatum</i>      | adult      | NTNU                | Jon K. Skei      | Norway; 63.217, 10.307   |
| MW490383  | TRDOD017-14  | TRD-ODO35        | BOLD:ACP7016 | 658[0n]     | 05-Jun-2014     | <i>Coenagrion armatum</i>      | adult      | NTNU                | Jon K. Skei      | Norway; 63.217, 10.307   |
| MW490202  | TRDOD018-14  | TRD-ODO36        | BOLD:ACP7016 | 658[0n]     | 05-Jun-2014     | <i>Coenagrion armatum</i>      | adult      | NTNU                | Jon K. Skei      | Norway; 63.217, 10.307   |
| MW490147  | TRDOD019-14  | TRD-ODO37        | BOLD:ACP7016 | 658[0n]     | 05-Jun-2014     | <i>Coenagrion armatum</i>      | adult      | NTNU                | Jon K. Skei      | Norway; 63.217, 10.307   |
| MT298328  | ZPLOD189-20  | MIB:ZPL:07989    | BOLD:ADK6267 | 658[0n]     |                 | <i>Coenagrion caerulescens</i> | adult      | Milano Bicocca      | Giacomo Assandri | Italy; 37.5, 13.2        |
| MT298329  | ZPLOD190-20  | MIB:ZPL:07990    | BOLD:ADK6267 | 658[0n]     |                 | <i>Coenagrion caerulescens</i> | adult      | Milano Bicocca      | Giacomo Assandri | Italy; 40.4, 8.6         |
| MT298325  | ZPLOD192-20  | MIB:ZPL:07992    | BOLD:ADK6267 | 658[0n]     |                 | <i>Coenagrion caerulescens</i> | adult      | Milano Bicocca      | Giacomo Assandri | Italy; 40.9, 16.6        |
| MT298324  | ZPLOD198-20  | MIB:ZPL:07998    | BOLD:ADK6267 | 658[0n]     |                 | <i>Coenagrion caerulescens</i> | adult      | Milano Bicocca      | Giacomo Assandri | Italy; 41.6, 14.8        |
| MT298326  | ZPLOD194-20  | MIB:ZPL:07994    | BOLD:ADK6267 | 658[0n]     |                 | <i>Coenagrion caerulescens</i> | adult      | Milano Bicocca      | Giacomo Assandri | Italy; 44.5, 7.7         |
| MT298327  | ZPLOD195-20  | MIB:ZPL:07995    | BOLD:ADK6267 | 658[0n]     |                 | <i>Coenagrion caerulescens</i> | adult      | Milano Bicocca      | Giacomo Assandri | Italy; 44.5, 7.7         |
| MT298322  | ZPLOD196-20  | MIB:ZPL:07996    | BOLD:ADK6267 | 658[0n]     |                 | <i>Coenagrion caerulescens</i> | adult      | Milano Bicocca      | Giacomo Assandri | Italy; 44.5, 7.7         |
| MT298323  | ZPLOD197-20  | MIB:ZPL:07997    | BOLD:ADK6267 | 658[0n]     |                 | <i>Coenagrion caerulescens</i> | adult      | Milano Bicocca      | Giacomo Assandri | Italy; 44.5, 7.7         |
| MW490311  | FBAQU556-10  | BC ZSM AQU 00461 | BOLD:ACH0316 | 658[0n]     | 27-Apr-2004     | <i>Coenagrion hastulatum</i>   | larvae     | SNSB-ZSM            | Monika Hess      | Germany; 47.816, 11.899  |
| MW490322  | TRDOD042-14  | TRD-ODO60        | BOLD:ACH0316 | 658[0n]     | 08-Jun-2014     | <i>Coenagrion hastulatum</i>   | adult      | NTNU                | Jon K. Skei      | Norway; 63.306, 10.813   |
| MW490200  | TRDOD075-14  | TRD-ODO93        | BOLD:ACH0316 | 630[0n]     | 01-Jul-2014     | <i>Coenagrion hastulatum</i>   | adult      | NTNU                | Jon K. Skei      | Norway; 63.374, 10.286   |
| MW490294  | TRDOD043-14  | TRD-ODO61        | BOLD:ACH0316 | 658[0n]     | 14-Jun-2014     | <i>Coenagrion hastulatum</i>   | adult      | NTNU                | Jon K. Skei      | Norway; 63.405, 10.729   |
| MW490151  | TRDOD076-14  | TRD-ODO94        | BOLD:ACH0316 | 630[1n]     | 19-Jul-2014     | <i>Coenagrion hastulatum</i>   | adult      | NTNU                | Jon K. Skei      | Norway; 63.526, 11.051   |
| MW490422  | ODTRI004-14  | TRD-ODO4         | BOLD:ACH0316 | 631[0n]     | 29-Jul-2010     | <i>Coenagrion hastulatum</i>   | adult      | NTNU                | Jon K. Skei      | Norway; 63.548, 10.996   |
| MW490362  | ODTRI006-14  | TRD-ODO6         | BOLD:ACH0316 | 621[0n]     | 29-Jul-2010     | <i>Coenagrion hastulatum</i>   | adult      | NTNU                | Jon K. Skei      | Norway; 63.548, 10.996   |
| MW490491  | ODOPL072-19  | OdoPL72          | BOLD:ACH0316 | 636[0n]     | 02-Nov-2018     | <i>Coenagrion hastulatum</i>   | larvae     | Lodz                | Grzegorz Tonczyk | Poland; 51.3338, 19.8961 |
| MW490261  | PLSW010-20   | ODOPL_144        | BOLD:ACH0316 | 618[1n]     | 12-Jun-2019     | <i>Coenagrion hastulatum</i>   | adult      | Lodz                | Grzegorz Tonczyk | Poland; 54.112, 23.043   |
| MW490350  | TRDOD005-14  | TRD-ODO23        | BOLD:ACM5448 | 658[0n]     | 06-Jun-2014     | <i>Coenagrion johanssoni</i>   | adult      | NTNU                | Jon K. Skei      | Norway; 63.321, 10.638   |
| MW490152  | TRDOD021-14  | TRD-ODO39        | BOLD:ACM5448 | 658[0n]     | 09-Jul-2014     | <i>Coenagrion johanssoni</i>   | adult      | NTNU                | Jon K. Skei      | Norway; 63.54, 10.989    |
| MW490315  | TRDOD022-14  | TRD-ODO40        | BOLD:ACM5448 | 658[0n]     | 09-Jul-2014     | <i>Coenagrion johanssoni</i>   | adult      | NTNU                | Jon K. Skei      | Norway; 63.54, 10.989    |
| MW490137  | ODTRI007-14  | TRD-ODO7         | BOLD:ACM5448 | 621[0n]     | 22-Aug-2010     | <i>Coenagrion johanssoni</i>   | adult      | NTNU                | Jon K. Skei      | Norway; 63.548, 10.996   |
| MW490112  | TRDOD074-14  | TRD-ODO92        | BOLD:ACM5448 | 658[0n]     | 05-Jul-2014     | <i>Coenagrion johanssoni</i>   | adult      | NTNU                | Jon K. Skei      | Norway; 63.548, 10.996   |
| MW490187  | FBAQU1429-13 | GBOL00273        | BOLD:ACG0797 | 658[0n]     | 27-Jun-2011     | <i>Coenagrion mercuriale</i>   | adult      | SNSB-ZSM            | Stefan Koch      | Germany; 48.119, 10.456  |
| MW490164  | GBMIX947-14  | GBOL10049        | BOLD:ACG0797 | 658[0n]     | 23-Jul-2014     | <i>Coenagrion mercuriale</i>   |            | SNSB-ZSM            | Michael Franzen  | Germany; 48.409, 11.795  |
| MW490446  | FBAQU559-10  | BC ZSM AQU 00464 | BOLD:AAJ0782 | 658[0n]     | 05-Sep-2003     | <i>Coenagrion ornatum</i>      | larvae     | SNSB-ZSM            | Monika Hess      | Germany; 48.35, 11.736   |

| GenBank # | Process ID   | Sample ID        | BIN          | Seq. Length | Collection Date | Identification               | Life Stage | Institution (short) | Identifier       | country; GPS              |
|-----------|--------------|------------------|--------------|-------------|-----------------|------------------------------|------------|---------------------|------------------|---------------------------|
| GU682176  | FBAQU310-09  | BC ZSM AQU 00310 | BOLD:AAJ0782 | 658[0n]     | 17-Jun-2009     | <i>Coenagrion ornatum</i>    | adult      | SNSB-ZSM            | M. Schoen        | Germany; 48.376, 11.842   |
| MW490467  | FBAQU1446-13 | GBOL00290        | BOLD:AAJ0782 | 658[0n]     | 26-May-2011     | <i>Coenagrion ornatum</i>    | adult      | SNSB-ZSM            | Michael Franzen  | Germany; 48.3795, 11.841  |
| MW490159  | FBAQU1447-13 | GBOL00291        | BOLD:AAJ0782 | 658[0n]     | 26-May-2011     | <i>Coenagrion ornatum</i>    | adult      | SNSB-ZSM            | Michael Franzen  | Germany; 48.3795, 11.841  |
| MW490306  | FBAQU1448-13 | GBOL00292        | BOLD:AAJ0782 | 658[0n]     | 26-May-2011     | <i>Coenagrion ornatum</i>    | adult      | SNSB-ZSM            | Michael Franzen  | Germany; 48.3795, 11.841  |
| MW490363  | GBODO079-18  | GBOL 20202       | BOLD:AAJ0782 | 658[5n]     | 12-Jul-2018     | <i>Coenagrion puella</i>     | adult      | SNSB-ZSM            | Stefan Koch      | Germany; 47.6668, 11.0506 |
| MW490454  | GBEPT918-14  | GBOL05488        | BOLD:AAJ0782 | 658[0n]     | 01-Jun-2014     | <i>Coenagrion puella</i>     | adult      | SNSB-ZSM            | Michael Franzen  | Germany; 47.709, 10.852   |
| MW490524  | GBODO037-18  | GBOL 20160       | BOLD:AAJ0782 | 658[1n]     | 27-Jun-2018     | <i>Coenagrion puella</i>     | adult      | SNSB-ZSM            | Stefan Koch      | Germany; 47.7561, 11.3698 |
| MW490553  | GBODO151-18  | GBOL 20274       | BOLD:AAJ0782 | 658[0n]     | 21-May-2018     | <i>Coenagrion puella</i>     | adult      | SNSB-ZSM            | Stefan Koch      | Germany; 47.7561, 11.3698 |
| MW490165  | GBODO153-18  | GBOL 20276       | BOLD:AAJ0782 | 658[0n]     | 21-May-2018     | <i>Coenagrion puella</i>     | adult      | SNSB-ZSM            | Stefan Koch      | Germany; 47.7561, 11.3698 |
| MW490289  | GBODO156-18  | GBOL 20279       | BOLD:AAJ0782 | 658[0n]     | 21-May-2018     | <i>Coenagrion puella</i>     | adult      | SNSB-ZSM            | Stefan Koch      | Germany; 47.7561, 11.3698 |
| MW490233  | GBODO186-18  | GBOL 20309       | BOLD:AAJ0782 | 658[0n]     | 21-May-2018     | <i>Coenagrion puella</i>     | adult      | SNSB-ZSM            | Stefan Koch      | Germany; 47.7561, 11.3698 |
| MW490562  | GBODO179-18  | GBOL 20302       | BOLD:AAJ0782 | 658[0n]     | 27-Jun-2018     | <i>Coenagrion puella</i>     | adult      | SNSB-ZSM            | Stefan Koch      | Germany; 47.8252, 11.3012 |
| HM901887  | FBAQU528-10  | BC ZSM AQU 00433 | BOLD:AAJ0782 | 616[0n]     | 16-Jul-2009     | <i>Coenagrion puella</i>     | adult      | SNSB-ZSM            | F. Weihrauch     | Germany; 47.895, 12.167   |
| MW490498  | GBODO176-18  | GBOL 20299       | BOLD:AAJ0782 | 658[0n]     | 22-May-2018     | <i>Coenagrion puella</i>     | adult      | SNSB-ZSM            | Stefan Koch      | Germany; 48.0616, 10.6428 |
| GU682174  | FBAQU311-09  | BC ZSM AQU 00311 | BOLD:AAJ0782 | 658[0n]     | 20-May-2009     | <i>Coenagrion puella</i>     | adult      | SNSB-ZSM            | M. Schoen        | Germany; 48.298, 11.822   |
| MW490279  | GBODO068-18  | GBOL 20191       | BOLD:AAJ0782 | 658[1n]     | 04-Jul-2018     | <i>Coenagrion puella</i>     | adult      | SNSB-ZSM            | Stefan Koch      | Germany; 48.3305, 11.8047 |
| MW490206  | GBODO069-18  | GBOL 20192       | BOLD:AAJ0782 | 655[0n]     | 04-Jul-2018     | <i>Coenagrion puella</i>     | adult      | SNSB-ZSM            | Stefan Koch      | Germany; 48.3537, 11.775  |
| MW490336  | GBEPT939-14  | GBOL05509        | BOLD:AAJ0782 | 658[0n]     | 22-May-2014     | <i>Coenagrion puella</i>     | adult      | SNSB-ZSM            | Michael Franzen  | Germany; 48.378, 11.841   |
| MW490381  | GODO028-18   | ZFMK-TIS-2010636 | BOLD:AAJ0782 | 658[0n]     | 27-Jun-2017     | <i>Coenagrion puella</i>     | adult      | ZFMK                | T. Sellmeier     | Germany; 50.8, 7.585      |
| MW490247  | GODO029-18   | ZFMK-TIS-2010637 | BOLD:AAJ0782 | 658[0n]     | 27-Jun-2017     | <i>Coenagrion puella</i>     | adult      | ZFMK                | T. Sellmeier     | Germany; 50.8, 7.585      |
| MW490307  | GODO031-18   | ZFMK-TIS-2010639 | BOLD:AAJ0782 | 658[0n]     | 11-Jul-2017     | <i>Coenagrion puella</i>     | adult      | ZFMK                | T. Sellmeier     | Germany; 50.8, 7.585      |
| MW490437  | GODO035-18   | ZFMK-TIS-2612910 | BOLD:AAJ0782 | 658[0n]     | 27-Jun-2017     | <i>Coenagrion puella</i>     | adult      | ZFMK                | T. Sellmeier     | Germany; 50.8, 7.585      |
| MW490406  | GODO036-18   | ZFMK-TIS-2612911 | BOLD:AAJ0782 | 658[0n]     | 11-Jul-2017     | <i>Coenagrion puella</i>     | adult      | ZFMK                | T. Sellmeier     | Germany; 50.8, 7.585      |
| MW490447  | ODOPL069-19  | OdoPL69          | BOLD:AAJ0782 | 635[0n]     | 02-Nov-2018     | <i>Coenagrion puella</i>     | larvae     | Lodz                | Grzegorz Tonczyk | Poland; 51.3338, 19.8961  |
| MW490347  | ODOPL070-19  | OdoPL70          | BOLD:AAJ0782 | 635[0n]     | 02-Nov-2018     | <i>Coenagrion puella</i>     | larvae     | Lodz                | Grzegorz Tonczyk | Poland; 51.3338, 19.8961  |
| MW490269  | ODOPL071-19  | OdoPL71          | BOLD:AAJ0782 | 631[0n]     | 02-Nov-2018     | <i>Coenagrion puella</i>     | larvae     | Lodz                | Grzegorz Tonczyk | Poland; 51.3338, 19.8961  |
| MW490219  | ODOPL102-19  | OdoPL102         | BOLD:AAJ0782 | 635[0n]     | 04-Nov-2018     | <i>Coenagrion puella</i>     | larvae     | Lodz                | Grzegorz Tonczyk | Poland; 51.6201, 19.3112  |
| MW490442  | ODOPL103-19  | OdoPL103         | BOLD:AAJ0782 | 635[0n]     | 04-Nov-2018     | <i>Coenagrion puella</i>     | larvae     | Lodz                | Grzegorz Tonczyk | Poland; 51.6201, 19.3112  |
| MW490226  | ODOPL104-19  | OdoPL104         | BOLD:AAJ0782 | 641[0n]     | 04-Nov-2018     | <i>Coenagrion puella</i>     | larvae     | Lodz                | Grzegorz Tonczyk | Poland; 51.6201, 19.3112  |
| MW490340  | PLSW008-20   | ODOPL_142        | BOLD:AAJ0782 | 658[1n]     | 12-Jun-2019     | <i>Coenagrion puella</i>     | adult      | Lodz                | Grzegorz Tonczyk | Poland; 54.112, 23.043    |
| MW490176  | GBEPT910-14  | GBOL05480        | BOLD:AAJ0782 | 658[0n]     | 01-Jun-2014     | <i>Coenagrion pulchellum</i> | adult      | SNSB-ZSM            | Michael Franzen  | Germany; 47.682, 10.731   |
| MW490484  | GBEPT911-14  | GBOL05481        | BOLD:AAJ0782 | 658[0n]     | 01-Jun-2014     | <i>Coenagrion pulchellum</i> | adult      | SNSB-ZSM            | Michael Franzen  | Germany; 47.682, 10.731   |
| MW490488  | GBODO154-18  | GBOL 20277       | BOLD:AAJ0782 | 658[0n]     | 21-May-2018     | <i>Coenagrion pulchellum</i> | adult      | SNSB-ZSM            | Stefan Koch      | Germany; 47.7561, 11.3698 |
| MW490493  | GBODO155-18  | GBOL 20278       | BOLD:AAJ0782 | 658[0n]     | 21-May-2018     | <i>Coenagrion pulchellum</i> | adult      | SNSB-ZSM            | Stefan Koch      | Germany; 47.7561, 11.3698 |
| MW490107  | GBODO157-18  | GBOL 20280       | BOLD:AAJ0782 | 658[0n]     | 21-May-2018     | <i>Coenagrion pulchellum</i> | adult      | SNSB-ZSM            | Stefan Koch      | Germany; 47.7561, 11.3698 |
| MW490440  | GBODO170-18  | GBOL 20293       | BOLD:AAJ0782 | 658[0n]     | 27-Jun-2018     | <i>Coenagrion pulchellum</i> | adult      | SNSB-ZSM            | Stefan Koch      | Germany; 47.7561, 11.3698 |
| MW490198  | GBODO188-18  | GBOL 20311       | BOLD:AAJ0782 | 647[0n]     | 21-May-2018     | <i>Coenagrion pulchellum</i> | adult      | SNSB-ZSM            | Stefan Koch      | Germany; 47.7561, 11.3698 |
| MW490436  | GBODO189-18  | GBOL 20312       | BOLD:AAJ0782 | 533[1n]     | 21-May-2018     | <i>Coenagrion pulchellum</i> | adult      | SNSB-ZSM            | Stefan Koch      | Germany; 47.7561, 11.3698 |
| MW490149  | GBODO129-18  | GBOL 20252       | BOLD:AAJ0782 | 658[0n]     | 27-Jun-2018     | <i>Coenagrion pulchellum</i> | adult      | SNSB-ZSM            | Stefan Koch      | Germany; 47.7852, 11.3619 |
| MW490139  | GBODO137-18  | GBOL 20260       | BOLD:AAJ0782 | 658[0n]     | 27-Jun-2018     | <i>Coenagrion pulchellum</i> | adult      | SNSB-ZSM            | Stefan Koch      | Germany; 47.7852, 11.3619 |
| MW490184  | GBMIX558-14  | GBOL09090        | BOLD:AAJ0782 | 658[0n]     | 04-Jul-2014     | <i>Coenagrion pulchellum</i> |            | SNSB-ZSM            | Hans Muehle      | Germany; 47.811, 11.59    |

| GenBank # | Process ID    | Sample ID          | BIN          | Seq. Length | Collection Date | Identification                  | Life Stage | Institution (short) | Identifier            | country; GPS               |
|-----------|---------------|--------------------|--------------|-------------|-----------------|---------------------------------|------------|---------------------|-----------------------|----------------------------|
| HM901888  | FBAQU529-10   | BC ZSM AQU 00434   | BOLD:AAJ0782 | 587[0n]     | 16-Jul-2009     | <i>Coenagrion pulchellum</i>    | adult      | SNSB-ZSM            | F. Weihrauch          | Germany; 47.895, 12.167    |
| HM901861  | FBAQU488-10   | BC ZSM AQU 00393   | BOLD:AAJ0782 | 551[1n]     | 16-Jul-2009     | <i>Coenagrion pulchellum</i>    | adult      | SNSB-ZSM            | S. V. Ober            | Germany; 47.908, 11.523    |
| MW490120  | GBEPT902-14   | GBOL05472          | BOLD:AAJ0782 | 658[0n]     | 13-Jun-2014     | <i>Coenagrion pulchellum</i>    | adult      | SNSB-ZSM            | Michael Franzen       | Germany; 49.085, 11.623    |
| MW490114  | GBEPT903-14   | GBOL05473          | BOLD:AAJ0782 | 658[0n]     | 13-Jun-2014     | <i>Coenagrion pulchellum</i>    | adult      | SNSB-ZSM            | Michael Franzen       | Germany; 49.085, 11.623    |
| MW490540  | GODO007-18    | ZFMK-TIS-2556889   | BOLD:AAJ0782 | 658[0n]     |                 | <i>Coenagrion pulchellum</i>    |            | ZFMK                | Laura von der Mark    | Germany; 53.4255, 12.7791  |
| MW490282  | GODO008-18    | ZFMK-TIS-2556891   | BOLD:AAJ0782 | 658[0n]     |                 | <i>Coenagrion pulchellum</i>    |            | ZFMK                | Laura von der Mark    | Germany; 53.4255, 12.7791  |
| MW490183  | GODO009-18    | ZFMK-TIS-2556897   | BOLD:AAJ0782 | 658[0n]     |                 | <i>Coenagrion pulchellum</i>    |            | ZFMK                | Laura von der Mark    | Germany; 53.4255, 12.7791  |
| MW490181  | GODO010-18    | ZFMK-TIS-2556899   | BOLD:AAJ0782 | 658[0n]     |                 | <i>Coenagrion pulchellum</i>    |            | ZFMK                | Laura von der Mark    | Germany; 53.4255, 12.7791  |
| MW490126  | ZMBN958-17    | IBOL Kurs2017-JE1  | BOLD:AAJ0782 | 658[0n]     | 23-Aug-2017     | <i>Coenagrion pulchellum</i>    | larvae     | Bergen              | Jonas M. Eliassen     | Norway; 60.333, 5.359      |
| MW490318  | TRDOD077-14   | TRD-ODO95          | BOLD:AAJ0782 | 658[0n]     | 19-Jul-2014     | <i>Coenagrion pulchellum</i>    | adult      | NTNU                | Jon K. Skei           | Norway; 63.526, 11.051     |
| MW490522  | ODTRI010-14   | TRD-ODO10          | BOLD:AAJ0782 | 658[0n]     | 29-Jul-2010     | <i>Coenagrion pulchellum</i>    | adult      | NTNU                | Jon K. Skei           | Norway; 63.548, 10.996     |
| MW490532  | ODTRI008-14   | TRD-ODO8           | BOLD:AAJ0782 | 622[0n]     | 29-Jul-2010     | <i>Coenagrion pulchellum</i>    | adult      | NTNU                | Jon K. Skei           | Norway; 63.548, 10.996     |
| MW490154  | ODTRI009-14   | TRD-ODO9           | BOLD:AAJ0782 | 658[0n]     | 29-Jul-2010     | <i>Coenagrion pulchellum</i>    | adult      | NTNU                | Jon K. Skei           | Norway; 63.548, 10.996     |
| MW490274  | TRDOD044-14   | TRD-ODO62          | BOLD:AAJ0782 | 658[0n]     | 14-Jul-2014     | <i>Coenagrion pulchellum</i>    | adult      | NTNU                | Jon K. Skei           | Norway; 63.653, 11.093     |
| MW490240  | PLSW017-20    | ODOPL_151          | BOLD:AAJ0782 | 658[0n]     | 12-Jun-2019     | <i>Coenagrion pulchellum</i>    | adult      | Lodz                | Grzegorz Tonczyk      | Poland; 54.112, 23.043     |
| MW490123  | PLSW019-20    | ODOPL_153          | BOLD:AAJ0782 | 658[0n]     | 12-Jun-2019     | <i>Coenagrion pulchellum</i>    | adult      | Lodz                | Grzegorz Tonczyk      | Poland; 54.112, 23.043     |
| MW490438  | EDF007-18     | NOaS1-2019_Odo0186 | BOLD:ACP4983 | 658[0n]     | 15-Jun-2018     | <i>Coenagrion scitulum</i>      | adult      | NHMW                | Iris Fischer          | Austria; ,                 |
| MW490472  | EDF008-18     | NOaS1-2019_Odo0187 | BOLD:ACP4983 | 658[0n]     | 15-Jun-2018     | <i>Coenagrion scitulum</i>      | adult      | NHMW                | Iris Fischer          | Austria; ,                 |
| MW490158  | GBEPT907-14   | GBOL05477          | BOLD:ACP4983 | 658[0n]     | 12-Jun-2014     | <i>Coenagrion scitulum</i>      | adult      | SNSB-ZSM            | Michael Franzen       | Austria; 47.782, 16.848    |
| MW490178  | GBEPT888-14   | GBOL05458          | BOLD:ACP4983 | 658[0n]     | 06-Jun-2014     | <i>Coenagrion scitulum</i>      | adult      | SNSB-ZSM            | Hans Muehle           | Greece; 41.114, 26.213     |
| HM901889  | FBAQU530-10   | BC ZSM AQU 00435   | BOLD:AAJ5749 | 601[0n]     | 16-Jul-2009     | <i>Cordulegaster bidentata</i>  | larvae     | SNSB-ZSM            | Monika Hess           | Germany; 47.687, 12.056    |
| MW490281  | GBMIX942-14   | GBOL10044          | BOLD:AAJ5773 | 658[0n]     | 23-Jul-2014     | <i>Cordulegaster boltonii</i>   |            | SNSB-ZSM            | Emmanuel FA Toussaint | France; 48.639, 0.085      |
| HM901890  | FBAQU531-10   | BC ZSM AQU 00436   | BOLD:AAJ5773 | 571[1n]     | 23-Aug-2009     | <i>Cordulegaster boltonii</i>   | larvae     | SNSB-ZSM            | Monika Hess           | Germany; 47.821, 11.904    |
| MW490410  | GODO037-18    | ZFMK-TIS-2007235   | BOLD:AAJ5773 | 658[0n]     | 03-Apr-2017     | <i>Cordulegaster boltonii</i>   |            | ZFMK                | S. Schueler           | Germany; 50.9081, 7.14023  |
| MW490296  | ZMBN037-15    | Kurs2015-AB1       | BOLD:AAJ5773 | 658[0n]     | 19-Aug-2015     | <i>Cordulegaster boltonii</i>   | larvae     | Bergen              | Steffen Roth          | Norway; 60.333, 5.359      |
| MW490492  | TRDOD083-14   | TRD-ODO101         | BOLD:AAJ5773 | 658[0n]     | 04-Jul-2008     | <i>Cordulegaster boltonii</i>   | adult      | NTNU                | Dag Dolmen            | Norway; 63.5, 10.983       |
| MW490228  | TRDOD029-14   | TRD-ODO47          | BOLD:AAJ5773 | 658[0n]     | 19-Jul-2014     | <i>Cordulegaster boltonii</i>   | adult      | NTNU                | Jon K. Skei           | Norway; 63.543, 11.033     |
| MW490286  | TRDOD068-14   | TRD-ODO86          | BOLD:AAJ5773 | 658[0n]     | 05-Aug-2014     | <i>Cordulegaster boltonii</i>   | larvae     | NTNU                | Gaute Kjaerstad       | Norway; 64.076, 11.717     |
| MW490469  | TRDOD084-14   | TRD-ODO102         | BOLD:AAJ5773 | 658[0n]     | 31-Jul-2009     | <i>Cordulegaster boltonii</i>   | adult      | NTNU                | Dag Dolmen            | Norway; 64.432, 11.001     |
| MW490369  | EDF003-18     | NOaS1-2019_Odo0181 | BOLD:ACQ4796 | 658[0n]     | 16-Jun-2018     | <i>Cordulegaster heros</i>      | adult      | NHMW                | Iris Fischer          | Austria; ,                 |
| MW490316  | EDF009-18     | NOaS1-2019_Odo0200 | BOLD:ACQ4796 | 658[0n]     | 14-Jul-2018     | <i>Cordulegaster heros</i>      | adult      | NHMW                | Iris Fischer          | Austria; ,                 |
| MW490260  | RODI004-20    | BOCO-CH-1          |              | 499[6n]     | 17-Jul-2012     | <i>Cordulegaster heros</i>      | adult      | Babes-Bolyai        | Lujza Keresztes       | Bulgaria; 41.846, 24.426   |
| LT715983  | GBMIN88645-17 | LT715983           | BOLD:ACQ4354 | 519[0n]     |                 | <i>Cordulegaster picta</i>      |            | GenBank, NCBI       |                       | 0 Russia; 44.6668, 37.9192 |
| MT298395  | ZPLOD314-20   | MIB:ZPL:08114      | BOLD:ACQ2278 | 658[0n]     |                 | <i>Cordulegaster trinacriae</i> | adult      | Milano Bicocca      | Giacomo Assandri      | Italy; 40.8, 16.4          |
| MT298394  | ZPLOD315-20   | MIB:ZPL:08115      | BOLD:ACQ2278 | 658[0n]     |                 | <i>Cordulegaster trinacriae</i> | adult      | Giacomo Assandri    | Giacomo Assandri      | Italy; 41.7, 14.9          |
| MW490331  | GBMIX687-14   | GBOL09789          | BOLD:AAJ5771 | 614[0n]     | 23-Jul-2014     | <i>Cordulia aenea</i>           |            | SNSB-ZSM            | Emmanuel FA Toussaint | France; 48.639, 0.085      |
| MW490103  | GBODO092-18   | GBOL 20215         | BOLD:AAJ5771 | 315[1n]     | 12-Jul-2018     | <i>Cordulia aenea</i>           | adult      | SNSB-ZSM            | Stefan Koch           | Germany; 47.6668, 11.0506  |
| MW490452  | GBEPT915-14   | GBOL05485          | BOLD:AAJ5771 | 642[0n]     | 01-Jun-2014     | <i>Cordulia aenea</i>           | adult      | SNSB-ZSM            | Michael Franzen       | Germany; 47.682, 10.731    |
| MW490133  | GBODO146-18   | GBOL 20269         | BOLD:AAJ5771 | 652[2n]     | 22-Apr-2018     | <i>Cordulia aenea</i>           | adult      | SNSB-ZSM            | Stefan Koch           | Germany; 47.7561, 11.3698  |
| MW490455  | GBODO132-18   | GBOL 20255         | BOLD:AAJ5771 | 318[3n]     | 21-May-2018     | <i>Cordulia aenea</i>           | adult      | SNSB-ZSM            | Stefan Koch           | Germany; 47.7852, 11.3619  |
| HM901862  | FBAQU489-10   | BC ZSM AQU 00394   | BOLD:AAJ5771 | 658[0n]     | 26-May-2009     | <i>Cordulia aenea</i>           | adult      | SNSB-ZSM            | S. V. Ober            | Germany; 48.048, 11.468    |

| GenBank # | Process ID   | Sample ID         | BIN          | Seq. Length | Collection Date | Identification               | Life Stage | Institution (short) | Identifier         | country; GPS              |
|-----------|--------------|-------------------|--------------|-------------|-----------------|------------------------------|------------|---------------------|--------------------|---------------------------|
| MW490526  | GBODO144-18  | GBOL 20267        | BOLD:AAJ5771 | 315[0n]     | 12-May-2018     | <i>Cordulia aenea</i>        | adult      | SNSB-ZSM            | Stefan Koch        | Germany; 48.0616, 10.6428 |
| MW490252  | TRDOD007-14  | TRD-ODO25         | BOLD:AAJ5771 | 658[0n]     | 01-Jul-2014     | <i>Cordulia aenea</i>        | adult      | NTNU                | Jon K. Skei        | Norway; 63.382, 10.869    |
| MW490271  | TRDOD004-14  | TRD-ODO22         | BOLD:ACP6876 | 658[0n]     | 07-Jul-2014     | <i>Cordulia aenea</i>        | adult      | NTNU                | Jon K. Skei        | Norway; 63.477, 11.252    |
| MW490358  | TRDOD006-14  | TRD-ODO24         | BOLD:AAJ5771 | 658[0n]     | 09-Jul-2014     | <i>Cordulia aenea</i>        | adult      | NTNU                | Jon K. Skei        | Norway; 63.54, 10.989     |
| MW490480  | TRDOD008-14  | TRD-ODO26         | BOLD:ACP6876 | 658[0n]     | 05-Jul-2014     | <i>Cordulia aenea</i>        | adult      | NTNU                | Jon K. Skei        | Norway; 63.548, 10.996    |
| MW490390  | ODOPL067-19  | OdoPL67           | BOLD:ACP6876 | 639[0n]     | 02-Nov-2018     | <i>Cordulia aenea</i>        | larvae     | Lodz                | Grzegorz Tonczyk   | Poland; 51.3338, 19.8961  |
| MW490424  | ODOPL068-19  | OdoPL68           | BOLD:ACP6876 | 641[0n]     | 02-Nov-2018     | <i>Cordulia aenea</i>        | larvae     | Lodz                | Grzegorz Tonczyk   | Poland; 51.3338, 19.8961  |
| MW490248  | PLSW024-20   | ODOPL_158         | BOLD:ACP6876 | 658[0n]     | 10-Jun-2019     | <i>Cordulia aenea</i>        | adult      | Lodz                | Grzegorz Tonczyk   | Poland; 54.088, 23.018    |
| MW490554  | PLSW025-20   | ODOPL_159         | BOLD:ACP6876 | 654[0n]     | 10-Jun-2019     | <i>Cordulia aenea</i>        | adult      | Lodz                | Grzegorz Tonczyk   | Poland; 54.088, 23.018    |
| MW490222  | PLSW026-20   | ODOPL_160         | BOLD:ACP6876 | 654[0n]     | 10-Jun-2019     | <i>Cordulia aenea</i>        | adult      | Lodz                | Grzegorz Tonczyk   | Poland; 54.088, 23.018    |
| MW490268  | GBEPT947-14  | GBOL05517         | BOLD:AAI9726 | 633[0n]     | 13-Jun-2014     | <i>Crocothemis erythraea</i> | adult      | SNSB-ZSM            | Michael Franzen    | Austria; 47.931, 16.746   |
| GU682175  | FBAQU312-09  | BC ZSM AQU 00312  | BOLD:AAI9726 | 658[0n]     | 13-Jun-2009     | <i>Crocothemis erythraea</i> | adult      | SNSB-ZSM            | M. Schoen          | Germany; 48.298, 11.822   |
| MW490533  | GODO042-19   | ZFMK-TIS-2616202  | BOLD:AAI9726 | 658[1n]     | 05-Jun-2018     | <i>Crocothemis erythraea</i> | adult      | Potsdam             | Udo Rothe          | Germany; 52.4666, 12.6981 |
| MW490565  | PLSW069-20   | ODOPL_203         | BOLD:AAI9726 | 658[0n]     | 28-Jul-2019     | <i>Crocothemis erythraea</i> | adult      | Lodz                | Grzegorz Tonczyk   | Poland; 51.573, 19.06     |
| MW490327  | PLSW070-20   | ODOPL_204         | BOLD:AAI9726 | 658[0n]     | 28-Jul-2019     | <i>Crocothemis erythraea</i> | adult      | Lodz                | Grzegorz Tonczyk   | Poland; 51.573, 19.06     |
| MW490321  | PLSW071-20   | ODOPL_205         | BOLD:AAI9726 | 647[0n]     | 28-Jul-2019     | <i>Crocothemis erythraea</i> | adult      | Lodz                | Grzegorz Tonczyk   | Poland; 51.573, 19.06     |
| MT298407  | ZPLOD334-20  | MIB:ZPL:08134     | BOLD:ABU6643 | 658[0n]     |                 | <i>Diplacodes lefebvrii</i>  | adult      | Milano Bicocca      | Giacomo Assandri   | Italy; 39.2, 8.2          |
| MT298406  | ZPLOD335-20  | MIB:ZPL:08135     | BOLD:ABU6643 | 658[0n]     |                 | <i>Diplacodes lefebvrii</i>  | adult      | Milano Bicocca      | Giacomo Assandri   | Italy; 39.2, 8.2          |
| GU682183  | FBAQU015-09  | BC ZSM AQU 00015  | BOLD:AAA2218 | 644[0n]     | 11-Apr-2009     | <i>Enallagma cyathigerum</i> | larvae     | SNSB-ZSM            | Monika Hess        | Germany; ,                |
| MW490118  | GBODO100-18  | GBOL 20223        | BOLD:AAA2218 | 658[0n]     | 12-Jul-2018     | <i>Enallagma cyathigerum</i> | adult      | SNSB-ZSM            | Stefan Koch        | Germany; 47.6656, 11.0246 |
| MW490250  | GBODO040-18  | GBOL 20163        | BOLD:AAA2218 | 658[2n]     | 05-Sep-2018     | <i>Enallagma cyathigerum</i> | adult      | SNSB-ZSM            | Stefan Koch        | Germany; 47.6668, 11.0506 |
| MW490528  | GBODO050-18  | GBOL 20173        | BOLD:AAA2218 | 567[2n]     | 05-Sep-2018     | <i>Enallagma cyathigerum</i> | adult      | SNSB-ZSM            | Stefan Koch        | Germany; 47.6668, 11.0506 |
| MW490557  | GBODO051-18  | GBOL 20174        | BOLD:AAA2218 | 511[3n]     | 05-Sep-2018     | <i>Enallagma cyathigerum</i> | adult      | SNSB-ZSM            | Stefan Koch        | Germany; 47.6668, 11.0506 |
| MW490117  | GBODO052-18  | GBOL 20175        | BOLD:AAA2218 | 658[2n]     | 05-Sep-2018     | <i>Enallagma cyathigerum</i> | adult      | SNSB-ZSM            | Stefan Koch        | Germany; 47.6668, 11.0506 |
| MW490343  | GBODO054-18  | GBOL 20177        | BOLD:AAA2218 | 658[3n]     | 05-Sep-2018     | <i>Enallagma cyathigerum</i> | adult      | SNSB-ZSM            | Stefan Koch        | Germany; 47.6668, 11.0506 |
| MW490359  | GBODO072-18  | GBOL 20195        | BOLD:AAA2218 | 577[0n]     | 12-Jul-2018     | <i>Enallagma cyathigerum</i> | adult      | SNSB-ZSM            | Stefan Koch        | Germany; 47.6668, 11.0506 |
| MW490535  | GBODO076-18  | GBOL 20199        | BOLD:AAA2218 | 658[1n]     | 12-Jul-2018     | <i>Enallagma cyathigerum</i> | adult      | SNSB-ZSM            | Stefan Koch        | Germany; 47.6668, 11.0506 |
| MW490512  | GBODO096-18  | GBOL 20219        | BOLD:AAA2218 | 658[2n]     | 12-Jul-2018     | <i>Enallagma cyathigerum</i> | adult      | SNSB-ZSM            | Stefan Koch        | Germany; 47.6668, 11.0506 |
| MW490301  | GBEPT912-14  | GBOL05482         | BOLD:AAA2218 | 658[0n]     | 01-Jun-2014     | <i>Enallagma cyathigerum</i> | adult      | SNSB-ZSM            | Michael Franzen    | Germany; 47.682, 10.731   |
| MW490385  | GBODO024-18  | GBOL 20147        | BOLD:AAA2218 | 658[1n]     | 27-Jul-2018     | <i>Enallagma cyathigerum</i> | adult      | SNSB-ZSM            | Stefan Koch        | Germany; 47.8252, 11.3012 |
| MW490190  | GBODO172-18  | GBOL 20295        | BOLD:AAA2218 | 658[0n]     | 22-May-2018     | <i>Enallagma cyathigerum</i> | adult      | SNSB-ZSM            | Stefan Koch        | Germany; 48.0616, 10.6428 |
| MW490537  | GBODO181-18  | GBOL 20304        | BOLD:AAA2218 | 658[0n]     | 21-Jun-2018     | <i>Enallagma cyathigerum</i> | adult      | SNSB-ZSM            | Stefan Koch        | Germany; 48.0616, 10.6428 |
| HQ563103  | FBAQU490-10  | BC ZSM AQU 00395  | BOLD:AAA2218 | 616[0n]     | 21-May-2009     | <i>Enallagma cyathigerum</i> | adult      | SNSB-ZSM            | S. V. Ober         | Germany; 48.107, 11.458   |
| GU682173  | FBAQU313-09  | BC ZSM AQU 00313  | BOLD:AAA2218 | 658[0n]     | 20-May-2009     | <i>Enallagma cyathigerum</i> | adult      | SNSB-ZSM            | M. Schoen          | Germany; 48.298, 11.822   |
| HQ563105  | FBAQU532-10  | BC ZSM AQU 00437  | BOLD:AAA2218 | 658[0n]     | 31-Jul-2009     | <i>Enallagma cyathigerum</i> | adult      | SNSB-ZSM            | F. Weihrauch       | Germany; 48.72, 11.676    |
| MW490408  | FBAQU1504-13 | GBOL00348         | BOLD:AAA2218 | 658[0n]     | 22-May-2012     | <i>Enallagma cyathigerum</i> | adult      | SNSB-ZSM            | Reinhard Mueller   | Germany; 52.2443, 13.1185 |
| MW490300  | GODO011-18   | ZFMK-TIS-2556883  | BOLD:AAA2218 | 658[0n]     |                 | <i>Enallagma cyathigerum</i> |            | ZFMK                | Laura von der Mark | Germany; 53.4255, 12.7791 |
| MW490460  | GODO012-18   | ZFMK-TIS-2556885  | BOLD:AAA2218 | 658[0n]     |                 | <i>Enallagma cyathigerum</i> |            | ZFMK                | Laura von der Mark | Germany; 53.4255, 12.7791 |
| MW490166  | GODO013-18   | ZFMK-TIS-2556893  | BOLD:AAA2218 | 658[0n]     |                 | <i>Enallagma cyathigerum</i> |            | ZFMK                | Laura von der Mark | Germany; 53.4255, 12.7791 |
| MW490354  | GODO014-18   | ZFMK-TIS-2556895  | BOLD:AAA2218 | 658[0n]     |                 | <i>Enallagma cyathigerum</i> |            | ZFMK                | Laura von der Mark | Germany; 53.4255, 12.7791 |
| MW490548  | ZMBN960-17   | IBOL Kurs2017-JE3 | BOLD:AAA2218 | 658[0n]     | 22-Aug-2017     | <i>Enallagma cyathigerum</i> | larvae     | Bergen              | Jonas M. Eliassen  | Norway; 60.579, 5.272     |

| GenBank # | Process ID   | Sample ID        | BIN          | Seq. Length | Collection Date | Identification               | Life Stage | Institution (short) | Identifier       | country; GPS              |
|-----------|--------------|------------------|--------------|-------------|-----------------|------------------------------|------------|---------------------|------------------|---------------------------|
| MW490227  | TRDOD072-14  | TRD-ODO90        | BOLD:AAA2218 | 658[0n]     | 01-Jul-2014     | <i>Enallagma cyathigerum</i> | adult      | NTNU                | Jon K. Skei      | Norway; 63.375, 10.292    |
| MW490225  | TRDOD024-14  | TRD-ODO42        | BOLD:AAA2218 | 658[0n]     | 09-Jul-2014     | <i>Enallagma cyathigerum</i> | adult      | NTNU                | Jon K. Skei      | Norway; 63.54, 10.989     |
| MW490218  | ODTRI011-14  | TRD-ODO11        | BOLD:AAA2218 | 602[0n]     | 29-Jul-2010     | <i>Enallagma cyathigerum</i> | adult      | NTNU                | Jon K. Skei      | Norway; 63.548, 10.996    |
| MW490136  | ODTRI012-14  | TRD-ODO12        | BOLD:AAA2218 | 611[0n]     | 29-Jul-2010     | <i>Enallagma cyathigerum</i> | adult      | NTNU                | Jon K. Skei      | Norway; 63.548, 10.996    |
| MW490411  | TRDOD073-14  | TRD-ODO91        | BOLD:AAA2218 | 658[0n]     | 14-Jul-2014     | <i>Enallagma cyathigerum</i> | adult      | NTNU                | Jon K. Skei      | Norway; 63.653, 11.093    |
| MW490507  | HETFI049-11  | FinHet49         | BOLD:AAA2218 | 658[0n]     | 31-Jul-2010     | <i>Enallagma cyathigerum</i> | adult      | Bergen              | Steffen Roth     | Norway; 69.231, 29.1609   |
| MW490193  | HETFI052-11  | FinHet52         | BOLD:AAA2218 | 658[0n]     | 27-Jul-2010     | <i>Enallagma cyathigerum</i> | adult      | Bergen              | Steffen Roth     | Norway; 69.8237, 25.2009  |
| MW490550  | PLSW072-20   | ODOPL_206        | BOLD:AAA2218 | 658[0n]     | 28-Jul-2019     | <i>Enallagma cyathigerum</i> | adult      | Lodz                | Grzegorz Tonczyk | Poland; 51.573, 19.06     |
| MW490276  | PLSW073-20   | ODOPL_207        | BOLD:AAA2218 | 633[0n]     | 28-Jul-2019     | <i>Enallagma cyathigerum</i> | adult      | Lodz                | Grzegorz Tonczyk | Poland; 51.573, 19.06     |
| MW490142  | ODOPL126-19  | OdoPL126         | BOLD:AAA2218 | 640[0n]     | 17-Nov-2018     | <i>Enallagma cyathigerum</i> | larvae     | Lodz                | Grzegorz Tonczyk | Poland; 51.5799, 19.2154  |
| MW490167  | ODOPL100-19  | OdoPL100         | BOLD:AAA2218 | 636[0n]     | 04-Nov-2018     | <i>Enallagma cyathigerum</i> | larvae     | Lodz                | Grzegorz Tonczyk | Poland; 51.6201, 19.3112  |
| MW490513  | ODOPL101-19  | OdoPL101         | BOLD:AAA2218 | 634[0n]     | 04-Nov-2018     | <i>Enallagma cyathigerum</i> | larvae     | Lodz                | Grzegorz Tonczyk | Poland; 51.6201, 19.3112  |
| MW490503  | PLSW016-20   | ODOPL_150        | BOLD:AAA2218 | 658[0n]     | 12-Jun-2019     | <i>Enallagma cyathigerum</i> | adult      | Lodz                | Grzegorz Tonczyk | Poland; 54.112, 23.043    |
| MW490544  | FBAQU1443-13 | GBOL00287        | BOLD:ACG0805 | 658[0n]     | 20-May-2012     | <i>Epitheca bimaculata</i>   | adult      | SNSB-ZSM            | Stefan Koch      | Germany; 47.6328, 10.5381 |
| HM901863  | FBAQU491-10  | BC ZSM AQU 00396 | BOLD:AAL4439 | 627[0n]     | 18-Jun-2009     | <i>Erythromma lindenii</i>   | adult      | SNSB-ZSM            | S. V. Ober       | Germany; 48.237, 11.506   |
| MW490287  | FBAQU562-10  | BC ZSM AQU 00467 | BOLD:AAL4439 | 658[0n]     | 29-Jun-2005     | <i>Erythromma lindenii</i>   | larvae     | SNSB-ZSM            | Monika Hess      | Germany; 48.878, 11.159   |
| MW490173  | GBODO087-18  | GBOL 20210       | BOLD:AAA4234 | 318[2n]     | 12-Jul-2018     | <i>Erythromma najas</i>      | adult      | SNSB-ZSM            | Stefan Koch      | Germany; 47.6668, 11.0506 |
| HM901864  | FBAQU492-10  | BC ZSM AQU 00397 | BOLD:AAA4234 | 600[0n]     | 25-May-2009     | <i>Erythromma najas</i>      | adult      | SNSB-ZSM            | S. V. Ober       | Germany; 48.107, 11.458   |
| MW490458  | FBAQU563-10  | BC ZSM AQU 00468 | BOLD:AAA4234 | 658[0n]     | 18-Aug-1993     | <i>Erythromma najas</i>      | larvae     | SNSB-ZSM            | Monika Hess      | Germany; 48.775, 13.005   |
| MW490518  | TRDOD020-14  | TRD-ODO38        | BOLD:AAA4234 | 658[0n]     | 05-Jun-2014     | <i>Erythromma najas</i>      | adult      | NTNU                | Jon K. Skei      | Norway; 63.217, 10.307    |
| MW490330  | TRDOD065-14  | TRD-ODO83        | BOLD:AAA4234 | 658[0n]     | 09-Jul-2008     | <i>Erythromma najas</i>      | adult      | NTNU                | Jon K. Skei      | Norway; 63.217, 10.307    |
| MW490116  | TRDOD066-14  | TRD-ODO84        | BOLD:AAA4234 | 658[0n]     | 09-Jul-2008     | <i>Erythromma najas</i>      | adult      | NTNU                | Jon K. Skei      | Norway; 63.217, 10.307    |
| MW490547  | TRDOD060-14  | TRD-ODO78        | BOLD:AAA4234 | 658[0n]     | 24-Jul-2009     | <i>Erythromma najas</i>      | adult      | NTNU                | Jon K. Skei      | Norway; 63.419, 10.655    |
| MW490254  | PLSW103-20   | ODOPL_223        | BOLD:AAA4234 | 658[0n]     | 07-May-2019     | <i>Erythromma najas</i>      | larvae     | Lodz                | Grzegorz Tonczyk | Poland; 51.551, 19.338    |
| MW490156  | ODOPL044-19  | OdoPL44          | BOLD:AAA4234 | 629[0n]     | 10-Oct-2018     | <i>Erythromma najas</i>      | larvae     | Lodz                | Grzegorz Tonczyk | Poland; 51.6184, 16.333   |
| MW490342  | ODOPL045-19  | OdoPL45          | BOLD:AAA4234 | 627[0n]     | 10-Oct-2018     | <i>Erythromma najas</i>      | larvae     | Lodz                | Grzegorz Tonczyk | Poland; 51.6184, 16.333   |
| MW490430  | ODOPL046-19  | OdoPL46          | BOLD:AAA4234 | 631[0n]     | 10-Oct-2018     | <i>Erythromma najas</i>      | larvae     | Lodz                | Grzegorz Tonczyk | Poland; 51.6184, 16.333   |
| MW490485  | ODOPL030-19  | OdoPL30          | BOLD:AAA4234 | 631[0n]     | 10-Oct-2018     | <i>Erythromma najas</i>      | larvae     | Lodz                | Grzegorz Tonczyk | Poland; 52.0552, 15.4302  |
| MW490275  | ODOPL031-19  | OdoPL31          | BOLD:AAA4234 | 627[0n]     | 10-Oct-2018     | <i>Erythromma najas</i>      | larvae     | Lodz                | Grzegorz Tonczyk | Poland; 52.0552, 15.4302  |
| MW490262  | ODOPL010-18  | OdoPL10          | BOLD:AAA4234 | 622[0n]     | 05-Oct-2018     | <i>Erythromma najas</i>      | larvae     | Lodz                | Grzegorz Tonczyk | Poland; 52.3855, 20.1954  |
| MW490304  | GBUPS192-14  | GBOL02842        | BOLD:AAL4437 | 662[2n]     |                 | <i>Erythromma viridulum</i>  | adult      | SNSB-ZSM            | Lars Hendrich    | Germany; ,                |
| HM422048  | FBAQU314-09  | BC ZSM AQU 00314 | BOLD:AAL4437 | 658[0n]     | 16-Jul-2009     | <i>Erythromma viridulum</i>  | adult      | SNSB-ZSM            | M. Schoen        | Germany; 48.301, 11.814   |
| MW490344  | GBMIX949-14  | GBOL10051        | BOLD:AAL4437 | 630[0n]     | 23-Jul-2014     | <i>Erythromma viridulum</i>  |            | SNSB-ZSM            | Michael Franzen  | Germany; 48.386, 11.82    |
| MW490243  | GBMIX950-14  | GBOL10052        | BOLD:AAL4437 | 658[0n]     | 23-Jul-2014     | <i>Erythromma viridulum</i>  |            | SNSB-ZSM            | Michael Franzen  | Germany; 48.386, 11.82    |
| MW490536  | FBAQU565-10  | BC ZSM AQU 00470 | BOLD:AAL4437 | 658[0n]     | 21-May-1993     | <i>Erythromma viridulum</i>  | larvae     | SNSB-ZSM            | Monika Hess      | Germany; 48.783, 13.015   |
| MW490194  | PLSW074-20   | ODOPL_208        | BOLD:AAL4437 | 658[0n]     | 19-Jul-2019     | <i>Erythromma viridulum</i>  | adult      | Lodz                | Grzegorz Tonczyk | Poland; 52.195, 18.58     |
| MW490400  | PLSW075-20   | ODOPL_209        | BOLD:AAL4437 | 658[0n]     | 19-Jul-2019     | <i>Erythromma viridulum</i>  | adult      | Lodz                | Grzegorz Tonczyk | Poland; 52.195, 18.58     |
| MW490270  | PLSW076-20   | ODOPL_210        | BOLD:AAL4437 | 637[0n]     | 19-Jul-2019     | <i>Erythromma viridulum</i>  | adult      | Lodz                | Grzegorz Tonczyk | Poland; 52.195, 18.58     |
| #NV       | ODBOL-1299   | GBMIN88698-17    | BOLD:ADC4839 | 657[0n]     |                 | <i>Gomphus pulchellus</i>    |            | GenBank, NCBI       |                  | France                    |
| MT298460  | ZPLOC825-20  | MIB:ZPL:08625    | BOLD:AAN0925 | 658[0n]     |                 | <i>Gomphus schneiderii</i>   | Adult      | Giacomo Assandri    | Giacomo Assandri | Montenegro; 42.2, 19.1    |
| MT298459  | ZPLOC824-20  | MIB:ZPL:08624    | BOLD:AAN0925 | 658[0n]     |                 | <i>Gomphus schneiderii</i>   | Adult      | Giacomo Assandri    | Giacomo Assandri | Montenegro; 42.3, 19.1    |



| GenBank # | Process ID    | Sample ID        | BIN          | Seq. Length | Collection Date | Identification               | Life Stage | Institution (short) | Identifier            | country; GPS              |
|-----------|---------------|------------------|--------------|-------------|-----------------|------------------------------|------------|---------------------|-----------------------|---------------------------|
| KX890970  | GBMIN88703-17 | KX890970         | BOLD:ADK7683 | 657[0n]     |                 | <i>Gomphus simillimus</i>    |            | GenBank, NCBI       |                       | 0 other; ,                |
| MW490388  | FBAQU1445-13  | GBOL00289        | BOLD:AAN0925 | 566[0n]     | 26-May-2011     | <i>Gomphus vulgatissimus</i> | adult      | SNSB-ZSM            | Michael Franzen       | Germany; 48.36, 11.88     |
| HQ563106  | FBAQU534-10   | BC ZSM AQU 00439 | BOLD:AAN0925 | 658[0n]     | 31-Aug-2009     | <i>Gomphus vulgatissimus</i> | larvae     | SNSB-ZSM            | Monika Hess           | Germany; 49.038, 12.187   |
| MW490189  | GBMIX410-14   | GBOL09702        | BOLD:AAN0925 | 647[0n]     | 31-Jul-2013     | <i>Gomphus vulgatissimus</i> | larvae     | SNSB-ZSM            | Christoph D. Schubart | Germany; 49.629, 11.804   |
| MW490389  | GBMIX414-14   | GBOL09706        | BOLD:AAN0925 | 658[0n]     | 31-Jul-2013     | <i>Gomphus vulgatissimus</i> | larvae     | SNSB-ZSM            | Christoph D. Schubart | Germany; 49.63, 11.795    |
| MW490208  | GODO021-18    | ZFMK-TIS-2010620 | BOLD:AAN0925 | 658[0n]     | 30-May-2017     | <i>Gomphus vulgatissimus</i> | adult      | ZFMK                | T. Sellmeier          | Germany; 50.777, 7.365    |
| MW490380  | GBMIX668-14   | GBOL09770        | BOLD:AAN0925 | 658[0n]     | 13-Aug-2014     | <i>Gomphus vulgatissimus</i> |            | SNSB-ZSM            | Lars Hendrich         | Germany; 51.364, 14.446   |
| MW490530  | GBEPT1040-14  | GBOL06275        | BOLD:AAN0925 | 658[0n]     | 05-Jun-2014     | <i>Gomphus vulgatissimus</i> | larvae     | SNSB-ZSM            | Lars Hendrich         | Germany; 51.503, 14.362   |
| MW490224  | GBEPT1041-14  | GBOL06276        | BOLD:AAN0925 | 640[0n]     | 05-Jun-2014     | <i>Gomphus vulgatissimus</i> | larvae     | SNSB-ZSM            | Lars Hendrich         | Germany; 51.503, 14.362   |
| MW490545  | GBEPT1731-14  | GBOL09313        | BOLD:AAN0925 | 657[0n]     | 13-Aug-2014     | <i>Gomphus vulgatissimus</i> | larvae     | SNSB-ZSM            | Christoph D. Schubart | Germany; 51.589, 14.733   |
| MW490360  | ODOPL073-19   | OdoPL73          | BOLD:AAN0925 | 638[0n]     | 02-Nov-2018     | <i>Gomphus vulgatissimus</i> | larvae     | Lodz                | Grzegorz Tonczyk      | Poland; 51.3164, 19.9037  |
| MW490453  | PLSW044-20    | ODOPL_178        | BOLD:AAN0925 | 658[0n]     | 13-Jun-2019     | <i>Gomphus vulgatissimus</i> | adult      | Lodz                | Grzegorz Tonczyk      | Poland; 54.037, 23.203    |
| MW490102  | PLSW045-20    | ODOPL_179        | BOLD:AAN0925 | 658[0n]     | 13-Jun-2019     | <i>Gomphus vulgatissimus</i> | adult      | Lodz                | Grzegorz Tonczyk      | Poland; 54.037, 23.203    |
| MW490241  | PLSW046-20    | ODOPL_180        | BOLD:AAN0925 | 658[0n]     | 13-Jun-2019     | <i>Gomphus vulgatissimus</i> | adult      | Lodz                | Grzegorz Tonczyk      | Poland; 54.037, 23.203    |
| MW490310  | GBEPT943-14   | GBOL05513        | BOLD:AAE5570 | 658[0n]     | 12-Jun-2014     | <i>Ischnura elegans</i>      | adult      | SNSB-ZSM            | Michael Franzen       | Austria; 47.782, 16.848   |
| HM376192  | FBAQU172-09   | BC ZSM AQU 00172 | BOLD:AAE5570 | 654[0n]     | 22-Jun-2009     | <i>Ischnura elegans</i>      | adult      | SNSB-ZSM            | Monika Hess           | Germany; ,                |
| MW490382  | GBUPS191-14   | GBOL02841        | BOLD:AAE5570 | 684[0n]     |                 | <i>Ischnura elegans</i>      | adult      | SNSB-ZSM            | Lars Hendrich         | Germany; ,                |
| MW490501  | GBUPS193-14   | GBOL02843        | BOLD:AAE5570 | 683[1n]     |                 | <i>Ischnura elegans</i>      | adult      | SNSB-ZSM            | Lars Hendrich         | Germany; ,                |
| MW490414  | GBUPS194-14   | GBOL02844        | BOLD:AAE5570 | 657[1n]     |                 | <i>Ischnura elegans</i>      | adult      | SNSB-ZSM            | Lars Hendrich         | Germany; ,                |
| MW490113  | GBUPS195-14   | GBOL02845        | BOLD:AAE5570 | 668[0n]     |                 | <i>Ischnura elegans</i>      | adult      | SNSB-ZSM            | Lars Hendrich         | Germany; ,                |
| MW490214  | GBUPS197-14   | GBOL02847        | BOLD:AAE5570 | 669[0n]     |                 | <i>Ischnura elegans</i>      | adult      | SNSB-ZSM            | Lars Hendrich         | Germany; ,                |
| MW490402  | GBUPS201-14   | GBOL02851        | BOLD:AAE5570 | 646[0n]     |                 | <i>Ischnura elegans</i>      | adult      | SNSB-ZSM            | Lars Hendrich         | Germany; ,                |
| MW490337  | GBUPS202-14   | GBOL02852        | BOLD:AAE5570 | 674[0n]     |                 | <i>Ischnura elegans</i>      | adult      | SNSB-ZSM            | Lars Hendrich         | Germany; ,                |
| MW490456  | GBUPS205-14   | GBOL02855        | BOLD:AAE5570 | 574[0n]     |                 | <i>Ischnura elegans</i>      | adult      | SNSB-ZSM            | Lars Hendrich         | Germany; ,                |
| MW490138  | GBUPS206-14   | GBOL02856        | BOLD:AAE5570 | 615[0n]     |                 | <i>Ischnura elegans</i>      | adult      | SNSB-ZSM            | Lars Hendrich         | Germany; ,                |
| MW490459  | GBODO084-18   | GBOL 20207       | BOLD:AAE5570 | 658[0n]     | 12-Jul-2018     | <i>Ischnura elegans</i>      | adult      | SNSB-ZSM            | Stefan Koch           | Germany; 47.6668, 11.0506 |
| MW490420  | GBEPT940-14   | GBOL05510        | BOLD:AAE5570 | 658[0n]     | 01-Jun-2014     | <i>Ischnura elegans</i>      | adult      | SNSB-ZSM            | Michael Franzen       | Germany; 47.709, 10.852   |
| MW490434  | GBODO131-18   | GBOL 20254       | BOLD:AAE5570 | 658[1n]     | 17-Jun-2018     | <i>Ischnura elegans</i>      | adult      | SNSB-ZSM            | Stefan Koch           | Germany; 47.7852, 11.3619 |
| MW490413  | GBODO021-18   | GBOL 20144       | BOLD:AAE5570 | 658[1n]     | 27-Jul-2018     | <i>Ischnura elegans</i>      | adult      | SNSB-ZSM            | Stefan Koch           | Germany; 47.8252, 11.3012 |
| HM901892  | FBAQU536-10   | BC ZSM AQU 00441 | BOLD:AAE5570 | 588[0n]     | 16-Jul-2009     | <i>Ischnura elegans</i>      | adult      | SNSB-ZSM            | F. Weihrauch          | Germany; 47.895, 12.167   |
| HQ563104  | FBAQU494-10   | BC ZSM AQU 00399 | BOLD:AAE5570 | 658[0n]     | 21-May-2009     | <i>Ischnura elegans</i>      | adult      | SNSB-ZSM            | S. V. Ober            | Germany; 48.107, 11.458   |
| HM901865  | FBAQU495-10   | BC ZSM AQU 00400 | BOLD:AAE5570 | 601[0n]     | 18-Jun-2009     | <i>Ischnura elegans</i>      | adult      | SNSB-ZSM            | S. V. Ober            | Germany; 48.237, 11.505   |
| MW490215  | GBODO061-18   | GBOL 20184       | BOLD:AAE5570 | 658[1n]     | 04-Jul-2018     | <i>Ischnura elegans</i>      | adult      | SNSB-ZSM            | Stefan Koch           | Germany; 48.3305, 11.8047 |
| MW490567  | GBODO063-18   | GBOL 20186       | BOLD:AAE5570 | 658[2n]     | 04-Jul-2018     | <i>Ischnura elegans</i>      | adult      | SNSB-ZSM            | Stefan Koch           | Germany; 48.3537, 11.775  |
| MW490412  | GBEPT938-14   | GBOL05508        | BOLD:AAE5570 | 658[0n]     | 22-May-2014     | <i>Ischnura elegans</i>      | adult      | SNSB-ZSM            | Michael Franzen       | Germany; 48.378, 11.841   |
| HM901891  | FBAQU535-10   | BC ZSM AQU 00440 | BOLD:AAE5570 | 614[0n]     | 31-Jul-2009     | <i>Ischnura elegans</i>      | adult      | SNSB-ZSM            | F. Weihrauch          | Germany; 48.72, 11.676    |
| MW490486  | FBAQU1611-13  | BCZSM_ODO_0091   | BOLD:AAE5570 | 407[0n]     | 05-May-2011     | <i>Ischnura elegans</i>      |            | SNSB-ZSM            | Lars Hendrich         | Germany; 52.12, 13.23     |
| MW490302  | GODO016-18    | ZFMK-TIS-2556887 | BOLD:AAE5570 | 658[0n]     |                 | <i>Ischnura elegans</i>      |            | ZFMK                | Bjoern Rulik          | Germany; 53.4255, 12.7791 |
| MW490135  | GBEPT890-14   | GBOL05460        | BOLD:AAE5570 | 658[0n]     | 07-Jun-2014     | <i>Ischnura elegans</i>      | adult      | SNSB-ZSM            | Hans Muehle           | Greece; 40.826, 25.99     |
| MW490468  | GBEPT891-14   | GBOL05461        | BOLD:AAE5570 | 658[0n]     | 10-Jun-2014     | <i>Ischnura elegans</i>      | adult      | SNSB-ZSM            | Hans Muehle           | Greece; 40.846, 25.855    |
| MW490169  | TRDOD027-14   | TRD-ODO45        | BOLD:AAE5570 | 658[0n]     | 14-Jul-2014     | <i>Ischnura elegans</i>      | adult      | NTNU                | Jon K. Skei           | Norway; 63.653, 11.093    |

| GenBank # | Process ID  | Sample ID        | BIN          | Seq. Length | Collection Date | Identification             | Life Stage | Institution (short) | Identifier           | country; GPS             |
|-----------|-------------|------------------|--------------|-------------|-----------------|----------------------------|------------|---------------------|----------------------|--------------------------|
| MW490415  | TRDOD090-14 | TRD-ODO108       | BOLD:AAE5570 | 658[0n]     | 30-Jul-2009     | <i>Ischnura elegans</i>    | adult      | NTNU                | Dag Dolmen           | Norway; 63.679, 11.05    |
| MW490515  | TRDOD088-14 | TRD-ODO106       | BOLD:AAE5570 | 658[0n]     | 03-Jul-2008     | <i>Ischnura elegans</i>    | adult      | NTNU                | Dag Dolmen           | Norway; 63.908, 11.588   |
| MW490445  | TRDOD089-14 | TRD-ODO107       | BOLD:AAE5570 | 658[0n]     | 31-Jul-2009     | <i>Ischnura elegans</i>    | adult      | NTNU                | Dag Dolmen           | Norway; 64.572, 10.95    |
| MT216297  | ODOPL059-19 | OdoPL59          | BOLD:AAE5570 | 633[0n]     | 11-Oct-2018     | <i>Ischnura elegans</i>    | larvae     | Lodz                | Grzegorz Tonczyk     | Poland; 50.4761, 17.9714 |
| MT216291  | ODOPL060-19 | OdoPL60          | BOLD:AAE5570 | 633[0n]     | 11-Oct-2018     | <i>Ischnura elegans</i>    | larvae     | Lodz                | Grzegorz Tonczyk     | Poland; 50.4761, 17.9714 |
| MT216299  | ODOPL087-19 | OdoPL87          | BOLD:AAE5570 | 633[0n]     | 02-Nov-2018     | <i>Ischnura elegans</i>    | larvae     | Lodz                | Grzegorz Tonczyk     | Poland; 51.3164, 19.9037 |
| MT216286  | ODOPL088-19 | OdoPL88          | BOLD:AAE5570 | 636[0n]     | 02-Nov-2018     | <i>Ischnura elegans</i>    | larvae     | Lodz                | Grzegorz Tonczyk     | Poland; 51.3164, 19.9037 |
| MT216295  | ODOPL089-19 | OdoPL89          | BOLD:AAE5570 | 636[0n]     | 02-Nov-2018     | <i>Ischnura elegans</i>    | larvae     | Lodz                | Grzegorz Tonczyk     | Poland; 51.3164, 19.9037 |
| MT216293  | ODOPL061-19 | OdoPL61          | BOLD:AAE5570 | 630[0n]     | 02-Nov-2018     | <i>Ischnura elegans</i>    | larvae     | Lodz                | Grzegorz Tonczyk     | Poland; 51.3338, 19.8961 |
| MT216292  | ODOPL048-19 | OdoPL48          | BOLD:AAE5570 | 633[0n]     | 10-Oct-2018     | <i>Ischnura elegans</i>    | larvae     | Lodz                | Grzegorz Tonczyk     | Poland; 51.6184, 16.333  |
| MT216300  | ODOPL049-19 | OdoPL49          | BOLD:AAE5570 | 629[0n]     | 10-Oct-2018     | <i>Ischnura elegans</i>    | larvae     | Lodz                | Grzegorz Tonczyk     | Poland; 51.6184, 16.333  |
| MW490409  | ODOPL004-18 | OdoPL4           | BOLD:AAE5570 | 558[0n]     | 10-Oct-2018     | <i>Ischnura elegans</i>    | larvae     | Lodz                | Grzegorz Tonczyk     | Poland; 51.7771, 19.4833 |
| MT216289  | ODOPL026-19 | OdoPL26          | BOLD:AAE5570 | 638[0n]     | 10-Oct-2018     | <i>Ischnura elegans</i>    | larvae     | Lodz                | Grzegorz Tonczyk     | Poland; 52.0552, 15.4302 |
| MT216294  | ODOPL027-19 | OdoPL27          | BOLD:AAE5570 | 630[0n]     | 10-Oct-2018     | <i>Ischnura elegans</i>    | larvae     | Lodz                | Grzegorz Tonczyk     | Poland; 52.0552, 15.4302 |
| MT216287  | ODOPL028-19 | OdoPL28          | BOLD:AAE5570 | 641[0n]     | 10-Oct-2018     | <i>Ischnura elegans</i>    | larvae     | Lodz                | Grzegorz Tonczyk     | Poland; 52.0552, 15.4302 |
| MT216298  | ODOPL013-18 | OdoPL13          | BOLD:AAE5570 | 626[0n]     | 05-Oct-2018     | <i>Ischnura elegans</i>    | larvae     | Lodz                | Grzegorz Tonczyk     | Poland; 52.3855, 20.1954 |
| MT216296  | ODOPL014-18 | OdoPL14          | BOLD:AAE5570 | 627[0n]     | 05-Oct-2018     | <i>Ischnura elegans</i>    | larvae     | Lodz                | Grzegorz Tonczyk     | Poland; 52.3855, 20.1954 |
| MT216288  | ODOPL015-18 | OdoPL15          | BOLD:AAE5570 | 626[0n]     | 05-Oct-2018     | <i>Ischnura elegans</i>    | larvae     | Lodz                | Grzegorz Tonczyk     | Poland; 52.836, 18.9037  |
| MT216290  | ODOPL016-18 | OdoPL16          | BOLD:AAE5570 | 627[0n]     | 05-Oct-2018     | <i>Ischnura elegans</i>    | larvae     | Lodz                | Grzegorz Tonczyk     | Poland; 52.836, 18.9037  |
| MW490314  | PLSW013-20  | ODOPL_147        | BOLD:AAE5570 | 658[0n]     | 12-Jun-2019     | <i>Ischnura elegans</i>    | adult      | Lodz                | Grzegorz Tonczyk     | Poland; 54.112, 23.043   |
| MW490371  | PLSW014-20  | ODOPL_148        | BOLD:AAE5570 | 658[0n]     | 12-Jun-2019     | <i>Ischnura elegans</i>    | adult      | Lodz                | Grzegorz Tonczyk     | Poland; 54.112, 23.043   |
| MW490463  | PLSW018-20  | ODOPL_152        | BOLD:AAE5570 | 658[0n]     | 12-Jun-2019     | <i>Ischnura elegans</i>    | adult      | Lodz                | Grzegorz Tonczyk     | Poland; 54.112, 23.043   |
| MT298471  | ZPLOD454-20 | MIB:ZPL:08254    | BOLD:AAE5570 | 658[0n]     |                 | <i>Ischnura genei</i>      | Adult      | Milano Bicocca      | Giacomo Assandri     | Italy; 37.1, 15.3        |
| MT298472  | ZPLOD457-20 | MIB:ZPL:08257    | BOLD:AAE5570 | 658[0n]     |                 | <i>Ischnura genei</i>      | Adult      | Milano Bicocca      | Giacomo Assandri     | Italy; 37.9, 12.7        |
| MT298470  | ZPLOD452-20 | MIB:ZPL:08252    | BOLD:AAE5570 | 658[0n]     |                 | <i>Ischnura genei</i>      | Adult      | Milano Bicocca      | Giacomo Assandri     | Italy; 40.7, 9           |
| HM901893  | FBAQU537-10 | BC ZSM AQU 00442 | BOLD:AAE5571 | 521[0n]     | 08-Dec-2009     | <i>Ischnura pumilio</i>    | adult      | SNSB-ZSM            | F. Weihrauch         | Germany; 47.895, 12.167  |
| HM901866  | FBAQU496-10 | BC ZSM AQU 00401 | BOLD:AAE5571 | 614[0n]     | 24-Aug-2009     | <i>Ischnura pumilio</i>    | adult      | SNSB-ZSM            | S. V. Ober           | Germany; 48.107, 11.458  |
| HM422049  | FBAQU315-09 | BC ZSM AQU 00315 | BOLD:AAE5571 | 658[0n]     | 20-May-2009     | <i>Ischnura pumilio</i>    | adult      | SNSB-ZSM            | M. Schoen            | Germany; 48.302, 11.817  |
| HM901894  | FBAQU538-10 | BC ZSM AQU 00443 | BOLD:AAE5571 | 614[0n]     | 31-Jul-2009     | <i>Ischnura pumilio</i>    | adult      | SNSB-ZSM            | F. Weihrauch         | Germany; 48.72, 11.676   |
| MT298477  | ZPLOD844-20 | MIB:ZPL:08644    | BOLD:AAE5570 | 658[0n]     |                 | <i>Ischnura saharensis</i> | Adult      | Milano Bicocca      | Giacomo Assandri     | Morocco; 28.5, -10       |
| MT298478  | ZPLOD845-20 | MIB:ZPL:08645    | BOLD:AAE5570 | 658[0n]     |                 | <i>Ischnura saharensis</i> | Adult      | Milano Bicocca      | Giacomo Assandri     | Morocco; 29.1, -10.3     |
| MW490256  | EDF015-18   | Odon224          | BOLD:ADC3442 | 658[0n]     | 07-Jun-2018     | <i>Lestes barbarus</i>     | adult      | NHMMW               | Stephan Koblmueeller | Austria; 47.719, 17.067  |
| MW490253  | EDF012-18   | Odon191          | BOLD:ADC3442 | 658[0n]     | 05-Jun-2018     | <i>Lestes barbarus</i>     | adult      | NHMMW               | Stephan Koblmueeller | Austria; 47.77, 16.88    |
| MW490418  | PLSW055-20  | ODOPL_189        | BOLD:ADC3442 | 658[0n]     | 15-Jul-2019     | <i>Lestes barbarus</i>     | adult      | Lodz                | Grzegorz Tonczyk     | Poland; 51.717, 19.341   |
| MW490081  | RODIO25-20  | ROLE-LB-2        | BOLD:ADC3442 | 632[0n]     | 18-Jul-2016     | <i>Lestes barbarus</i>     | adult      | Babes-Bolyai        | Anna Denes           | Romania; 45.333, 29.489  |
| MW490161  | RODIO26-20  | ROLE-LB-3        | BOLD:ADC3442 | 626[0n]     | 18-Jul-2016     | <i>Lestes barbarus</i>     | adult      | Babes-Bolyai        | Anna Denes           | Romania; 45.333, 29.489  |
| MW490496  | PLSW056-20  | ODOPL_190        | BOLD:AEC4388 | 612[1n]     | 15-Jul-2019     | <i>Lestes dryas</i>        | adult      | Lodz                | Grzegorz Tonczyk     | Poland; 51.717, 19.341   |
| MW490127  | PLSW057-20  | ODOPL_191        | BOLD:AEC4388 | 658[0n]     | 15-Jul-2019     | <i>Lestes dryas</i>        | adult      | Lodz                | Grzegorz Tonczyk     | Poland; 51.717, 19.341   |
| MW490338  | PLSW058-20  | ODOPL_192        | BOLD:AEC4388 | 658[1n]     | 15-Jul-2019     | <i>Lestes dryas</i>        | adult      | Lodz                | Grzegorz Tonczyk     | Poland; 51.717, 19.341   |
| MW490319  | EDF014-18   | Odon222          | BOLD:ADC3318 | 658[1n]     | 07-Jun-2018     | <i>Lestes macrostigma</i>  | adult      | NHMMW               | Stephan Koblmueeller | Austria; 47.719, 17.067  |
| MW490249  | EDF013-18   | Odon197          | BOLD:ADC3318 | 658[0n]     | 05-Jun-2018     | <i>Lestes macrostigma</i>  | adult      | NHMMW               | Stephan Koblmueeller | Austria; 47.77, 16.87    |

| GenBank # | Process ID   | Sample ID          | BIN          | Seq. Length | Collection Date | Identification                 | Life Stage | Institution (short) | Identifier       | country; GPS              |
|-----------|--------------|--------------------|--------------|-------------|-----------------|--------------------------------|------------|---------------------|------------------|---------------------------|
| MW490393  | GBEPT898-14  | GBOL05468          | BOLD:ACP4984 | 615[1n]     | 03-Jul-2014     | <i>Lestes sponsa</i>           | adult      | SNSB-ZSM            | Michael Franzen  | Germany; 47.791, 12.112   |
| MW490191  | GBODO018-18  | GBOL 20141         | BOLD:ACP4984 | 314[1n]     | 27-Jul-2018     | <i>Lestes sponsa</i>           | adult      | SNSB-ZSM            | Stefan Koch      | Germany; 47.8252, 11.3012 |
| MW490095  | GBODO133-18  | GBOL 20256         | BOLD:ACP4984 | 312[2n]     | 27-Jun-2018     | <i>Lestes sponsa</i>           | adult      | SNSB-ZSM            | Stefan Koch      | Germany; 47.8252, 11.3012 |
| MW490217  | GBODO123-18  | GBOL 20246         | BOLD:ACP4984 | 318[2n]     | 19-Jul-2018     | <i>Lestes sponsa</i>           | adult      | SNSB-ZSM            | Stefan Koch      | Germany; 47.9229, 11.5085 |
| MW490229  | TRDOD048-14  | TRD-ODO66          | BOLD:ACP4984 | 658[0n]     | 01-Aug-2014     | <i>Lestes sponsa</i>           | adult      | NTNU                | Jon K. Skei      | Norway; 63.322, 10.652    |
| MW490394  | TRDOD049-14  | TRD-ODO67          | BOLD:ACP4984 | 658[0n]     | 01-Aug-2014     | <i>Lestes sponsa</i>           | adult      | NTNU                | Jon K. Skei      | Norway; 63.322, 10.652    |
| MW490108  | TRDOD030-14  | TRD-ODO48          | BOLD:ACP4984 | 658[0n]     | 19-Jul-2014     | <i>Lestes sponsa</i>           | adult      | NTNU                | Jon K. Skei      | Norway; 63.526, 11.051    |
| MW490295  | TRDOD031-14  | TRD-ODO49          | BOLD:ACP4984 | 658[0n]     | 22-Jul-2014     | <i>Lestes sponsa</i>           | adult      | NTNU                | Jon K. Skei      | Norway; 63.548, 10.996    |
| MW490407  | PLSW059-20   | ODOPL_193          | BOLD:ACP4984 | 608[1n]     | 14-Jul-2019     | <i>Lestes sponsa</i>           | adult      | Lodz                | Grzegorz Tonczyk | Poland; 51.581, 19.219    |
| MW490207  | PLSW061-20   | ODOPL_195          | BOLD:ACP4984 | 658[0n]     | 14-Jul-2019     | <i>Lestes sponsa</i>           | adult      | Lodz                | Grzegorz Tonczyk | Poland; 51.581, 19.219    |
| MW490092  | GBODO039-18  | GBOL 20162         | BOLD:ACG0123 | 318[0n]     | 05-Sep-2018     | <i>Lestes virens</i>           | adult      | SNSB-ZSM            | Stefan Koch      | Germany; 47.6668, 11.0506 |
| MW490144  | GBODO053-18  | GBOL 20176         | BOLD:ACG0123 | 318[0n]     | 05-Sep-2018     | <i>Lestes virens</i>           | adult      | SNSB-ZSM            | Stefan Koch      | Germany; 47.6668, 11.0506 |
| MW490519  | GBODO073-18  | GBOL 20196         | BOLD:ACG0123 | 318[0n]     | 12-Jul-2018     | <i>Lestes virens</i>           | adult      | SNSB-ZSM            | Stefan Koch      | Germany; 47.6668, 11.0506 |
| MW490098  | GBODO075-18  | GBOL 20198         | BOLD:ACG0123 | 318[0n]     | 12-Jul-2018     | <i>Lestes virens</i>           | adult      | SNSB-ZSM            | Stefan Koch      | Germany; 47.6668, 11.0506 |
| MW490391  | GBODO090-18  | GBOL 20213         | BOLD:ACG0123 | 318[0n]     | 12-Jul-2018     | <i>Lestes virens</i>           | adult      | SNSB-ZSM            | Stefan Koch      | Germany; 47.6668, 11.0506 |
| MW490552  | ODOPL017-19  | OdoPL17            | BOLD:ACG0123 | 634[0n]     | 14-Oct-2018     | <i>Lestes virens</i>           | adult      | Lodz                | Grzegorz Tonczyk | Poland; 51.5814, 19.2188  |
| MW490534  | ODOPL018-19  | OdoPL18            | BOLD:ACG0123 | 631[0n]     | 14-Oct-2018     | <i>Lestes virens</i>           | adult      | Lodz                | Grzegorz Tonczyk | Poland; 51.5814, 19.2188  |
| MW490556  | ODOPL019-19  | OdoPL19            | BOLD:ACG0123 | 636[0n]     | 14-Oct-2018     | <i>Lestes virens</i>           | adult      | Lodz                | Grzegorz Tonczyk | Poland; 51.5814, 19.2188  |
| MW490566  | FBAQU1427-13 | GBOL00271          | BOLD:ACG0123 | 620[0n]     | 23-Aug-2011     | <i>Lestes virens vestalis</i>  | adult      | SNSB-ZSM            | Stefan Koch      | Germany; 47.6291, 11.1713 |
| MW490326  | GBEPT913-14  | GBOL05483          | BOLD:ACG0123 | 622[0n]     | 03-Jul-2014     | <i>Lestes virens vestalis</i>  | adult      | SNSB-ZSM            | Michael Franzen  | Germany; 47.791, 12.112   |
| MW490561  | GBEPT914-14  | GBOL05484          | BOLD:ACG0123 | 619[0n]     | 03-Jul-2014     | <i>Lestes virens vestalis</i>  | adult      | SNSB-ZSM            | Michael Franzen  | Germany; 47.791, 12.112   |
| MW490348  | EDF004-18    | NOaS1-2019_Odo0182 | BOLD:ADR0815 | 658[0n]     | 21-Jun-2018     | <i>Leucorrhinia albifrons</i>  | adult      | NHMW                | Iris Fischer     | Austria; ,                |
| MW490482  | EDF005-18    | NOaS1-2019_Odo0183 | BOLD:ADR0815 | 658[0n]     | 21-Jun-2018     | <i>Leucorrhinia albifrons</i>  | adult      | NHMW                | Iris Fischer     | Austria; ,                |
| MW490080  | PLSW021-20   | ODOPL_155          | BOLD:ADR0815 | 658[0n]     | 09-Jul-2019     | <i>Leucorrhinia albifrons</i>  | adult      | Lodz                | Grzegorz Tonczyk | Poland; 54.03, 23.052     |
| MW490427  | EDF006-18    | NOaS1-2019_Odo0185 | BOLD:ADC4475 | 658[0n]     | 26-Jun-2018     | <i>Leucorrhinia caudalis</i>   | adult      | NHMW                | Iris Fischer     | Austria; ,                |
| MW490479  | EDF011-18    | Odon176            | BOLD:ADC4475 | 658[0n]     | 19-May-2018     | <i>Leucorrhinia caudalis</i>   | adult      | NHMW                | Gernot Kunz      | Austria; 48.194, 16.484   |
| MW490110  | GBEPT900-14  | GBOL05470          | BOLD:AAJ2437 | 658[0n]     | 03-Jul-2014     | <i>Leucorrhinia dubia</i>      | adult      | SNSB-ZSM            | Michael Franzen  | Germany; 47.791, 12.112   |
| MW490483  | GBEPT901-14  | GBOL05471          | BOLD:AAJ2437 | 654[1n]     | 03-Jul-2014     | <i>Leucorrhinia dubia</i>      | adult      | SNSB-ZSM            | Michael Franzen  | Germany; 47.791, 12.112   |
| MW490132  | GBODO036-18  | GBOL 20159         | BOLD:AAJ2437 | 658[7n]     | 27-Jun-2018     | <i>Leucorrhinia dubia</i>      | adult      | SNSB-ZSM            | Stefan Koch      | Germany; 47.8252, 11.3012 |
| MW490549  | GBODO136-18  | GBOL 20259         | BOLD:AAJ2437 | 318[0n]     | 27-Jun-2018     | <i>Leucorrhinia dubia</i>      | adult      | SNSB-ZSM            | Stefan Koch      | Germany; 47.8252, 11.3012 |
| HM901868  | FBAQU501-10  | BC ZSM AQU 00406   | BOLD:AAJ2437 | 599[0n]     | 16-Jul-2009     | <i>Leucorrhinia dubia</i>      | adult      | SNSB-ZSM            | S. V. Ober       | Germany; 47.909, 11.523   |
| HM901867  | FBAQU500-10  | BC ZSM AQU 00405   | BOLD:AAJ2437 | 600[0n]     | 20-May-2009     | <i>Leucorrhinia dubia</i>      | adult      | SNSB-ZSM            | S. V. Ober       | Germany; 48.046, 11.467   |
| MW490177  | TRDOD009-14  | TRD-ODO27          | BOLD:AAJ2437 | 658[0n]     | 01-Jul-2014     | <i>Leucorrhinia dubia</i>      | adult      | NTNU                | Jon K. Skei      | Norway; 63.375, 10.292    |
| MW490171  | TRDOD010-14  | TRD-ODO28          | BOLD:AAJ2437 | 658[0n]     | 07-Jul-2014     | <i>Leucorrhinia dubia</i>      | adult      | NTNU                | Jon K. Skei      | Norway; 63.476, 11.244    |
| MW490541  | TRDOD012-14  | TRD-ODO30          | BOLD:AAJ2437 | 658[0n]     | 09-Jul-2014     | <i>Leucorrhinia dubia</i>      | adult      | NTNU                | Jon K. Skei      | Norway; 63.54, 10.989     |
| MW490251  | TRDOD011-14  | TRD-ODO29          | BOLD:AAJ2437 | 658[0n]     | 27-Jun-2014     | <i>Leucorrhinia dubia</i>      | adult      | NTNU                | Jon K. Skei      | Norway; 63.663, 10.943    |
| MW490277  | ODOPL129-19  | OdoPL129           | BOLD:AAJ2437 | 541[0n]     | 17-Nov-2018     | <i>Leucorrhinia dubia</i>      | larvae     | Lodz                | Grzegorz Tonczyk | Poland; 51.5799, 19.2154  |
| MW490303  | ODOPL099-19  | OdoPL99            | BOLD:AAJ2437 | 635[0n]     | 04-Nov-2018     | <i>Leucorrhinia dubia</i>      | larvae     | Lodz                | Grzegorz Tonczyk | Poland; 51.6201, 19.3112  |
| MW490558  | GBODO026-18  | GBOL 20149         | BOLD:ADC3719 | 318[1n]     | 27-Jul-2018     | <i>Leucorrhinia pectoralis</i> | adult      | SNSB-ZSM            | Stefan Koch      | Germany; 47.9229, 11.5085 |
| MW490096  | ODOPL024-19  | OdoPL24            | BOLD:ADC3719 | 625[0n]     | 14-Oct-2018     | <i>Leucorrhinia pectoralis</i> | larvae     | Lodz                | Grzegorz Tonczyk | Poland; 51.5814, 19.2188  |
| MW490297  | PLSW051-20   | ODOPL_185          | BOLD:ADC3719 | 650[0n]     | 12-Jun-2019     | <i>Leucorrhinia pectoralis</i> | adult      | Lodz                | Grzegorz Tonczyk | Poland; 54.112, 23.043    |

| GenBank # | Process ID   | Sample ID        | BIN          | Seq. Length | Collection Date | Identification                  | Life Stage | Institution (short) | Identifier       | country; GPS                |
|-----------|--------------|------------------|--------------|-------------|-----------------|---------------------------------|------------|---------------------|------------------|-----------------------------|
| MW490443  | PLSW052-20   | ODOPL_186        | BOLD:ADC3719 | 658[0n]     | 12-Jun-2019     | <i>Leucorrhinia pectoralis</i>  | adult      | Lodz                | Grzegorz Tonczyk | Poland; 54.112, 23.043      |
| MW490500  | PLSW053-20   | ODOPL_187        | BOLD:ADC3719 | 658[1n]     | 12-Jun-2019     | <i>Leucorrhinia pectoralis</i>  | adult      | Lodz                | Grzegorz Tonczyk | Poland; 54.112, 23.043      |
| JN991193  | GBA8708-12   | JN991193         | BOLD:ADC3719 | 467[0n]     |                 | <i>Leucorrhinia pectoralis</i>  |            | GenBank, NCBI       |                  | 0 Sweden; ,                 |
| MW490160  | TRDOD013-14  | TRD-ODO31        | BOLD:ADC1709 | 658[0n]     | 09-Jul-2014     | <i>Leucorrhinia rubicunda</i>   | adult      | NTNU                | Jon K. Skei      | Norway; 63.54, 10.989       |
| HM901869  | FBAQU0502-10 | BC ZSM AQU 00407 | BOLD:AAJ2758 | 658[0n]     | 26-May-2009     | <i>Libellula depressa</i>       | adult      | SNSB-ZSM            | S. V. Ober       | Germany; 48.046, 11.467     |
| MW490234  | GBODO145-18  | GBOL_20268       | BOLD:AAJ2758 | 658[0n]     | 12-May-2018     | <i>Libellula depressa</i>       | adult      | SNSB-ZSM            | Stefan Koch      | Germany; 48.0616, 10.6428   |
| MW490379  | PLSW146-20   | ODOPL_233        | BOLD:AAJ2758 | 658[0n]     | 07-Aug-2019     | <i>Libellula depressa</i>       | larvae     | Lodz                | Grzegorz Tonczyk | Poland; 49.429, 21.859      |
| MW490242  | PLSW147-20   | ODOPL_234        | BOLD:AAJ2758 | 658[0n]     | 07-Aug-2019     | <i>Libellula depressa</i>       | larvae     | Lodz                | Grzegorz Tonczyk | Poland; 49.429, 21.859      |
| MW490395  | PLSW148-20   | ODOPL_235        | BOLD:AAJ2758 | 649[0n]     | 07-Aug-2019     | <i>Libellula depressa</i>       | larvae     | Lodz                | Grzegorz Tonczyk | Poland; 49.429, 21.859      |
| MW490141  | RODI027-20   | ROLI-LD-1        | BOLD:AAJ2758 | 658[0n]     | 11-Jul-2016     | <i>Libellula depressa</i>       | adult      | Babes-Bolyai        | Anna Denes       | Romania; 46.63, 25.591      |
| MW490258  | GBEPT944-14  | GBOL05514        | BOLD:ACP3530 | 658[0n]     | 13-Jun-2014     | <i>Libellula fulva</i>          | adult      | SNSB-ZSM            | Michael Franzen  | Austria; 47.931, 16.746     |
| MW490378  | GBODO006-18  | GBOL_20129       | BOLD:ACP3530 | 318[0n]     | 21-May-2018     | <i>Libellula fulva</i>          | adult      | SNSB-ZSM            | Stefan Koch      | Germany; 47.7561, 11.3698   |
| MW490376  | PLSW033-20   | ODOPL_167        | BOLD:ACP3530 | 658[0n]     | 09-Jul-2019     | <i>Libellula fulva</i>          | adult      | Lodz                | Grzegorz Tonczyk | Poland; 54.03, 23.052       |
| MW490523  | PLSW034-20   | ODOPL_168        | BOLD:ACP3530 | 658[0n]     | 09-Jul-2019     | <i>Libellula fulva</i>          | adult      | Lodz                | Grzegorz Tonczyk | Poland; 54.03, 23.052       |
| MW490333  | PLSW035-20   | ODOPL_169        | BOLD:ACP3530 | 658[0n]     | 09-Jul-2019     | <i>Libellula fulva</i>          | adult      | Lodz                | Grzegorz Tonczyk | Poland; 54.03, 23.052       |
| MW490361  | GBODO001-18  | GBOL_20124       | BOLD:AAB5337 | 321[1n]     | 21-May-2018     | <i>Libellula quadrimaculata</i> | adult      | SNSB-ZSM            | Stefan Koch      | Germany; 47.7561, 11.3698   |
| MW490439  | GBODO002-18  | GBOL_20125       | BOLD:AAB5337 | 318[0n]     | 21-May-2018     | <i>Libellula quadrimaculata</i> | adult      | SNSB-ZSM            | Stefan Koch      | Germany; 47.7561, 11.3698   |
| MW490546  | GBODO011-18  | GBOL_20134       | BOLD:AAB5337 | 309[0n]     | 27-Jul-2018     | <i>Libellula quadrimaculata</i> | adult      | SNSB-ZSM            | Stefan Koch      | Germany; 47.8252, 11.3012   |
| HM901870  | FBAQU0503-10 | BC ZSM AQU 00408 | BOLD:AAB5337 | 618[0n]     | 25-May-2009     | <i>Libellula quadrimaculata</i> | adult      | SNSB-ZSM            | S. V. Ober       | Germany; 48.107, 11.458     |
| MW490356  | GODO043-19   | ZFMK-TIS-2616203 | BOLD:AAB5337 | 658[1n]     | 30-May-2018     | <i>Libellula quadrimaculata</i> | adult      | Potsdam             | Udo Rothe        | Germany; 52.4559, 12.693    |
| MW490231  | GODO044-19   | ZFMK-TIS-2616215 | BOLD:AAB5337 | 658[0n]     | 01-Jun-1992     | <i>Libellula quadrimaculata</i> | adult      | Potsdam             |                  | 0 Germany; 53.2962, 12.0863 |
| MW490170  | TRDOD057-14  | TRD-ODO75        | BOLD:AAB5337 | 658[0n]     | 24-Jul-2010     | <i>Libellula quadrimaculata</i> | adult      | NTNU                | Jon K. Skei      | Norway; 63.322, 10.652      |
| MW490398  | TRDOD051-14  | TRD-ODO69        | BOLD:AAB5337 | 658[0n]     | 03-Aug-2014     | <i>Libellula quadrimaculata</i> | adult      | NTNU                | Jon K. Skei      | Norway; 63.536, 11.005      |
| MW490404  | TRDOD028-14  | TRD-ODO46        | BOLD:AAB5337 | 658[0n]     | 20-Jul-2014     | <i>Libellula quadrimaculata</i> | adult      | NTNU                | Jon K. Skei      | Norway; 63.549, 11.038      |
| MW490163  | TRDOD003-14  | TRD-ODO21        | BOLD:AAB5337 | 658[0n]     | 27-Jun-2014     | <i>Libellula quadrimaculata</i> | adult      | NTNU                | Jon K. Skei      | Norway; 63.603, 11.159      |
| MW490083  | ODOPL122-19  | OdoPL122         | BOLD:AAB5337 | 637[0n]     | 17-Nov-2018     | <i>Libellula quadrimaculata</i> | larvae     | Lodz                | Grzegorz Tonczyk | Poland; 51.5799, 19.2154    |
| MW490349  | ODOPL096-19  | OdoPL96          | BOLD:AAB5337 | 644[0n]     | 04-Nov-2018     | <i>Libellula quadrimaculata</i> | larvae     | Lodz                | Grzegorz Tonczyk | Poland; 51.6201, 19.3112    |
| MW490317  | ODOPL097-19  | OdoPL97          | BOLD:AAB5337 | 643[0n]     | 04-Nov-2018     | <i>Libellula quadrimaculata</i> | larvae     | Lodz                | Grzegorz Tonczyk | Poland; 51.6201, 19.3112    |
| MW490542  | ODOPL098-19  | OdoPL98          | BOLD:AAB5337 | 639[0n]     | 04-Nov-2018     | <i>Libellula quadrimaculata</i> | larvae     | Lodz                | Grzegorz Tonczyk | Poland; 51.6201, 19.3112    |
| MW490564  | PLSW030-20   | ODOPL_164        | BOLD:AAB5337 | 658[0n]     | 09-Jul-2019     | <i>Libellula quadrimaculata</i> | adult      | Lodz                | Grzegorz Tonczyk | Poland; 54.03, 23.052       |
| MW490365  | PLSW031-20   | ODOPL_165        | BOLD:AAB5337 | 658[0n]     | 09-Jul-2019     | <i>Libellula quadrimaculata</i> | adult      | Lodz                | Grzegorz Tonczyk | Poland; 54.03, 23.052       |
| MW490353  | PLSW032-20   | ODOPL_166        | BOLD:AAB5337 | 658[0n]     | 09-Jul-2019     | <i>Libellula quadrimaculata</i> | adult      | Lodz                | Grzegorz Tonczyk | Poland; 54.03, 23.052       |
| MT298523  | ZPLOD556-20  | MIB:ZPL:08356    | BOLD:ACW0675 | 658[0n]     |                 | <i>Lindenia tetraphylla</i>     | adult      | Milano Bicocca      | Giacomo Assandri | Italy; 37.7, 12.8           |
| MT298525  | ZPLOD550-20  | MIB:ZPL:08350    | BOLD:ACW0675 | 658[0n]     |                 | <i>Lindenia tetraphylla</i>     | adult      | Milano Bicocca      | Giacomo Assandri | Italy; 40, 8.5              |
| MT298527  | ZPLOD555-20  | MIB:ZPL:08355    | BOLD:ACW0675 | 658[0n]     |                 | <i>Lindenia tetraphylla</i>     | adult      | Milano Bicocca      | Giacomo Assandri | Italy; 41.6, 14.9           |
| MT298526  | ZPLOD553-20  | MIB:ZPL:08353    | BOLD:ACW0675 | 658[0n]     |                 | <i>Lindenia tetraphylla</i>     | adult      | Milano Bicocca      | Giacomo Assandri | Italy; 42, 14.8             |
| MT298524  | ZPLOD552-20  | MIB:ZPL:08352    | BOLD:ACW0675 | 658[0n]     |                 | <i>Lindenia tetraphylla</i>     | adult      | Milano Bicocca      | Giacomo Assandri | Italy; 43.1, 12.2           |
| MW490213  | FBAQU1428-13 | GBOL00272        | BOLD:AAC3125 | 651[0n]     | 28-Jun-2011     | <i>Nehalennia speciosa</i>      | adult      | SNSB-ZSM            | Stefan Koch      | Germany; 47.6328, 10.5381   |
| MW490182  | GBEPT895-14  | GBOL05465        | BOLD:AAC3125 | 658[0n]     | 03-Jul-2014     | <i>Nehalennia speciosa</i>      | adult      | SNSB-ZSM            | Michael Franzen  | Germany; 47.791, 12.112     |
| MW490563  | GBEPT896-14  | GBOL05466        | BOLD:AAC3125 | 658[0n]     | 03-Jul-2014     | <i>Nehalennia speciosa</i>      | adult      | SNSB-ZSM            | Michael Franzen  | Germany; 47.791, 12.112     |
| MW490511  | GBEPT897-14  | GBOL05467        | BOLD:AAC3125 | 658[0n]     | 03-Jul-2014     | <i>Nehalennia speciosa</i>      | adult      | SNSB-ZSM            | Michael Franzen  | Germany; 47.791, 12.112     |

| GenBank # | Process ID   | Sample ID        | BIN          | Seq. Length | Collection Date | Identification                  | Life Stage | Institution (short) | Identifier            | country; GPS             |
|-----------|--------------|------------------|--------------|-------------|-----------------|---------------------------------|------------|---------------------|-----------------------|--------------------------|
| MW490088  | GBEPT942-14  | GBOL05512        | BOLD:AAC3125 | 658[0n]     | 03-Jul-2014     | <i>Nehalennia speciosa</i>      | adult      | SNSB-ZSM            | Michael Franzen       | Germany; 47.791, 12.112  |
| HM901895  | FBAQU541-10  | BC ZSM AQU 00446 | BOLD:AAC3125 | 610[0n]     | 16-Jul-2009     | <i>Nehalennia speciosa</i>      | adult      | SNSB-ZSM            | F. Weihrauch          | Germany; 47.895, 12.167  |
| MW490435  | PLSW004-20   | ODOPL_138        | BOLD:AAC3125 | 658[0n]     | 14-Jun-2019     | <i>Nehalennia speciosa</i>      | adult      | Lodz                | Grzegorz Tonczyk      | Poland; 54.089, 23.022   |
| MW490425  | PLSW005-20   | ODOPL_139        | BOLD:AAC3125 | 658[0n]     | 14-Jun-2019     | <i>Nehalennia speciosa</i>      | adult      | Lodz                | Grzegorz Tonczyk      | Poland; 54.089, 23.022   |
| MW490157  | PLSW006-20   | ODOPL_140        | BOLD:AAC3125 | 658[0n]     | 14-Jun-2019     | <i>Nehalennia speciosa</i>      | adult      | Lodz                | Grzegorz Tonczyk      | Poland; 54.089, 23.022   |
| MW490255  | GBEPT922-14  | GBOL05492        | BOLD:AAE5061 | 593[2n]     | 11-Jun-2014     | <i>Onychogomphus forcipatus</i> | adult      | SNSB-ZSM            | Michael Franzen       | Austria; 48.019, 16.166  |
| HM901898  | FBAQU544-10  | BC ZSM AQU 00449 | BOLD:AAE5061 | 614[0n]     | 31-Jul-2009     | <i>Onychogomphus forcipatus</i> | larvae     | SNSB-ZSM            | Monika Hess           | Germany; 47.741, 11.12   |
| HM901897  | FBAQU543-10  | BC ZSM AQU 00448 | BOLD:AAE5061 | 536[1n]     | 04-Nov-2009     | <i>Onychogomphus forcipatus</i> | larvae     | SNSB-ZSM            | Monika Hess           | Germany; 48.043, 12.798  |
| HM901871  | FBAQU504-10  | BC ZSM AQU 00409 | BOLD:AAE5061 | 614[0n]     | 18-Jun-2009     | <i>Onychogomphus forcipatus</i> | adult      | SNSB-ZSM            | S. V. Ober            | Germany; 48.236, 11.505  |
| HM901896  | FBAQU542-10  | BC ZSM AQU 00447 | BOLD:AAE5061 | 569[0n]     | 31-Aug-2009     | <i>Onychogomphus forcipatus</i> | larvae     | SNSB-ZSM            | Monika Hess           | Germany; 49.038, 12.187  |
| MW459447  | GODO002-18   | ZFMK-TIS-2534021 | BOLD:AAE5061 | 658[0n]     | 10-Aug-2016     | <i>Onychogomphus forcipatus</i> |            | ZFMK                | Simone Chapuis        | Germany; 50.8, 7.17      |
| MW459820  | GODO003-18   | ZFMK-TIS-2534116 | BOLD:AAE5061 | 658[0n]     | 10-Aug-2016     | <i>Onychogomphus forcipatus</i> |            | ZFMK                | Simone Chapuis        | Germany; 50.8, 7.32      |
| MW459607  | GODO004-18   | ZFMK-TIS-2534156 | BOLD:AAE5061 | 658[0n]     | 10-Aug-2016     | <i>Onychogomphus forcipatus</i> |            | ZFMK                | Simone Chapuis        | Germany; 50.8, 7.32      |
| MT298542  | ZPLOT564-20  | MIB:ZPL:08364    | BOLD:AAE5061 | 658[0n]     |                 | <i>Onychogomphus forcipatus</i> | adult      | Milano Bicocca      | Giacomo Assandri      | Italy; 38, 15.3          |
| MT298543  | ZPLOT565-20  | MIB:ZPL:08365    | BOLD:AAE5061 | 658[0n]     |                 | <i>Onychogomphus forcipatus</i> | adult      | Milano Bicocca      | Giacomo Assandri      | Italy; 38, 15.3          |
| MT298536  | ZPLOT578-20  | MIB:ZPL:08378    | BOLD:AAE5061 | 658[0n]     |                 | <i>Onychogomphus forcipatus</i> | adult      | Giacomo Assandri    | Giacomo Assandri      | Italy; 40.6, 16.8        |
| MT298538  | ZPLOT580-20  | MIB:ZPL:08380    | BOLD:AAE5061 | 658[0n]     |                 | <i>Onychogomphus forcipatus</i> | adult      | Milano Bicocca      | Giacomo Assandri      | Italy; 41.9, 15          |
| MT298537  | ZPLOT579-20  | MIB:ZPL:08379    | BOLD:AAE5061 | 658[0n]     |                 | <i>Onychogomphus forcipatus</i> | adult      | Giacomo Assandri    | Giacomo Assandri      | Italy; 44.5, 10.9        |
| MT298535  | ZPLOT576-20  | MIB:ZPL:08376    | BOLD:AAE5061 | 658[0n]     |                 | <i>Onychogomphus forcipatus</i> | adult      | Giacomo Assandri    | Giacomo Assandri      | Italy; 45.8, 9.4         |
| MT298532  | ZPLOT569-20  | MIB:ZPL:08369    | BOLD:AAE5061 | 658[0n]     |                 | <i>Onychogomphus forcipatus</i> | adult      | Giacomo Assandri    | Giacomo Assandri      | Italy; 45.9, 11          |
| MT298531  | ZPLOT568-20  | MIB:ZPL:08368    | BOLD:AAE5061 | 658[0n]     |                 | <i>Onychogomphus forcipatus</i> | adult      | Giacomo Assandri    | Giacomo Assandri      | Italy; 46, 11.3          |
| MT298540  | ZPLOT563-20  | MIB:ZPL:08363    | BOLD:AAE5061 | 658[0n]     |                 | <i>Onychogomphus forcipatus</i> | adult      | Milano Bicocca      | Giacomo Assandri      | Italy; 46, 13.6          |
| MT298533  | ZPLOT570-20  | MIB:ZPL:08370    | BOLD:AAE5061 | 658[0n]     |                 | <i>Onychogomphus forcipatus</i> | adult      | Giacomo Assandri    | Giacomo Assandri      | Italy; 46.1, 11.1        |
| MT298534  | ZPLOT571-20  | MIB:ZPL:08371    | BOLD:AAE5061 | 658[0n]     |                 | <i>Onychogomphus forcipatus</i> | adult      | Giacomo Assandri    | Giacomo Assandri      | Italy; 46.1, 11.1        |
| MT298544  | ZPLOT566-20  | MIB:ZPL:08366    | BOLD:AAE5061 | 658[0n]     |                 | <i>Onychogomphus forcipatus</i> | adult      | Giacomo Assandri    | Giacomo Assandri      | Italy; 46.1, 11.2        |
| MT298541  | ZPLOT562-20  | MIB:ZPL:08362    | BOLD:AAE5061 | 658[0n]     |                 | <i>Onychogomphus forcipatus</i> | adult      | Milano Bicocca      | Giacomo Assandri      | Italy; 46.2, 12.9        |
| MW490489  | PLSW041-20   | ODOPL_175        | BOLD:AAE5061 | 652[0n]     | 13-Jun-2019     | <i>Onychogomphus forcipatus</i> | adult      | Lodz                | Grzegorz Tonczyk      | Poland; 54.097, 23.063   |
| MW490192  | PLSW042-20   | ODOPL_176        | BOLD:AAE5061 | 658[0n]     | 13-Jun-2019     | <i>Onychogomphus forcipatus</i> | adult      | Lodz                | Grzegorz Tonczyk      | Poland; 54.097, 23.063   |
| MW490097  | PLSW043-20   | ODOPL_177        | BOLD:AAE5061 | 658[0n]     | 13-Jun-2019     | <i>Onychogomphus forcipatus</i> | adult      | Lodz                | Grzegorz Tonczyk      | Poland; 54.097, 23.063   |
| MT298548  | ZPLOT581-20  | MIB:ZPL:08381    | BOLD:ADC3114 | 658[0n]     |                 | <i>Onychogomphus uncatus</i>    | adult      | Milano Bicocca      | Giacomo Assandri      | Italy; 37.1, 15          |
| MT298545  | ZPLOT587-20  | MIB:ZPL:08387    | BOLD:ADC3114 | 658[0n]     |                 | <i>Onychogomphus uncatus</i>    | adult      | Milano Bicocca      | Giacomo Assandri      | Italy; 41.6, 14.6        |
| MT298547  | ZPLOT582-20  | MIB:ZPL:08382    | BOLD:ADC3114 | 658[0n]     |                 | <i>Onychogomphus uncatus</i>    | adult      | Milano Bicocca      | Giacomo Assandri      | Italy; 44.5, 8.8         |
| MT298546  | ZPLOT585-20  | MIB:ZPL:08385    | BOLD:ADC3114 | 658[0n]     |                 | <i>Onychogomphus uncatus</i>    | adult      | Giacomo Assandri    | Giacomo Assandri      | Italy; 45.3, 9           |
| MW490320  | GBEPT949-14  | GBOL05519        | BOLD:ACP4340 | 658[0n]     | 14-Jun-2014     | <i>Ophiogomphus cecilia</i>     | adult      | SNSB-ZSM            | Michael Franzen       | Austria; 48.132, 16.95   |
| MW490155  | GBEPT1622-14 | GBOL-08729       | BOLD:ACP4340 | 658[0n]     | 17-Jul-2013     | <i>Ophiogomphus cecilia</i>     | larvae     | SNSB-ZSM            | Tobias Windmaisser    | Germany; 49.072, 12.297  |
| MW490377  | GBMIX417-14  | GBOL09709        | BOLD:ACP4340 | 409[0n]     | 17-Jul-2013     | <i>Ophiogomphus cecilia</i>     | larvae     | SNSB-ZSM            | Christoph D. Schubart | Germany; 49.072, 12.297  |
| MW490239  | GBMIX418-14  | GBOL09710        | BOLD:ACP4340 | 658[0n]     | 17-Jul-2013     | <i>Ophiogomphus cecilia</i>     | larvae     | SNSB-ZSM            | Christoph D. Schubart | Germany; 49.072, 12.297  |
| MW490100  | GBMIX667-14  | GBOL09769        | BOLD:ACP4340 | 409[0n]     | 13-Aug-2014     | <i>Ophiogomphus cecilia</i>     |            | SNSB-ZSM            | Lars Hendrich         | Germany; 51.364, 14.446  |
| MW490505  | GBEPT1043-14 | GBOL06278        | BOLD:ACP4340 | 658[0n]     | 05-Jun-2014     | <i>Ophiogomphus cecilia</i>     | larvae     | SNSB-ZSM            | Lars Hendrich         | Germany; 51.503, 14.362  |
| MW490087  | ODOPL076-19  | OdoPL76          | BOLD:ACP4340 | 636[0n]     | 02-Nov-2018     | <i>Ophiogomphus cecilia</i>     | larvae     | Lodz                | Grzegorz Tonczyk      | Poland; 51.3164, 19.9037 |
| MW490115  | ODOPL078-19  | OdoPL78          | BOLD:ACP4340 | 644[0n]     | 02-Nov-2018     | <i>Ophiogomphus cecilia</i>     | larvae     | Lodz                | Grzegorz Tonczyk      | Poland; 51.3164, 19.9037 |

| GenBank # | Process ID    | Sample ID        | BIN           | Seq. Length | Collection Date | Identification                 | Life Stage | Institution (short) | Identifier           | country; GPS              |
|-----------|---------------|------------------|---------------|-------------|-----------------|--------------------------------|------------|---------------------|----------------------|---------------------------|
| MW490201  | ODOPL107-19   | OdoPL107         | BOLD:ACP4340  | 642[0n]     | 11-Nov-2018     | <i>Ophiogomphus cecilia</i>    | larvae     | Lodz                | Grzegorz Tonczyk     | Poland; 51.4938, 18.9853  |
| MW490278  | ODOPL039-19   | OdoPL39          | BOLD:ACP4340  | 641[0n]     | 10-Oct-2018     | <i>Ophiogomphus cecilia</i>    | larvae     | Lodz                | Grzegorz Tonczyk     | Poland; 51.6184, 16.333   |
| MW490238  | EDF010-18     | Odon32           | BOLD:ACQ8102  | 658[0n]     | 05-Jun-2017     | <i>Orthetrum albistylum</i>    | adult      | NHMW                | Stephan Koblmueeller | Austria; 47.07, 15.134    |
| MW490175  | GBODO059-18   | GBOL 20182       | BOLD:AAK5997  | 658[0n]     | 04-Jul-2018     | <i>Orthetrum brunneum</i>      | adult      | SNSB-ZSM            | Stefan Koch          | Germany; 48.3305, 11.8047 |
| MW490205  | GBODO060-18   | GBOL 20183       | BOLD:AAK5997  | 658[2n]     | 04-Jul-2018     | <i>Orthetrum brunneum</i>      | adult      | SNSB-ZSM            | Stefan Koch          | Germany; 48.3305, 11.8047 |
| HM422050  | FBAQU319-09   | BC ZSM AQU 00319 | BOLD:AAK5997  | 658[0n]     | 13-Jun-2009     | <i>Orthetrum brunneum</i>      | adult      | SNSB-ZSM            | M. Schoen            | Germany; 48.339, 11.799   |
| MW490085  | PLSW062-20    | ODOPL_196        | BOLD:AAK5997  | 658[0n]     | 14-Jul-2019     | <i>Orthetrum brunneum</i>      | adult      | Lodz                | Grzegorz Tonczyk     | Poland; 51.598, 19.272    |
| MW490122  | PLSW063-20    | ODOPL_197        | BOLD:AAK5997  | 658[0n]     | 14-Jul-2019     | <i>Orthetrum brunneum</i>      | adult      | Lodz                | Grzegorz Tonczyk     | Poland; 51.598, 19.272    |
| HM901872  | FBAQU505-10   | BC ZSM AQU 00410 | BOLD:AAK5996  | 646[0n]     | 25-May-2009     | <i>Orthetrum cancellatum</i>   | adult      | SNSB-ZSM            | S. V. Ober           | Germany; 48.107, 11.458   |
| MW490392  | GODO038-18    | ZFMK-TIS-2531806 | BOLD:AAK5996  | 658[0n]     | 15-Jun-2014     | <i>Orthetrum cancellatum</i>   | adult      | ZFMK                | Bjoern Rulik         | Germany; 53.4048, 12.866  |
| MW490293  | ODOPL051-19   | OdoPL51          | BOLD:AAK5996  | 633[0n]     | 10-Oct-2018     | <i>Orthetrum cancellatum</i>   | larvae     | Lodz                | Grzegorz Tonczyk     | Poland; 50.4118, 18.1075  |
| MW490555  | ODOPL052-19   | OdoPL52          | BOLD:AAK5996  | 633[0n]     | 11-Oct-2018     | <i>Orthetrum cancellatum</i>   | larvae     | Lodz                | Grzegorz Tonczyk     | Poland; 50.4118, 18.1075  |
| MW490506  | ODOPL127-19   | OdoPL127         | BOLD:AAK5996  | 635[0n]     | 17-Nov-2018     | <i>Orthetrum cancellatum</i>   | larvae     | Lodz                | Grzegorz Tonczyk     | Poland; 51.5799, 19.2154  |
| MW490091  | ODOPL128-19   | OdoPL128         | BOLD:AAK5996  | 623[0n]     | 17-Nov-2018     | <i>Orthetrum cancellatum</i>   | larvae     | Lodz                | Grzegorz Tonczyk     | Poland; 51.5799, 19.2154  |
| MW490246  | PLSW027-20    | ODOPL_161        | BOLD:AAK5996  | 658[0n]     | 10-Jun-2019     | <i>Orthetrum cancellatum</i>   | adult      | Lodz                | Grzegorz Tonczyk     | Poland; 54.022, 23.053    |
| MW490292  | PLSW028-20    | ODOPL_162        | BOLD:AAK5996  | 658[0n]     | 10-Jun-2019     | <i>Orthetrum cancellatum</i>   | adult      | Lodz                | Grzegorz Tonczyk     | Poland; 54.022, 23.053    |
| MW490129  | PLSW029-20    | ODOPL_163        | BOLD:AAK5996  | 658[0n]     | 10-Jun-2019     | <i>Orthetrum cancellatum</i>   | adult      | Lodz                | Grzegorz Tonczyk     | Poland; 54.022, 23.053    |
| MT298569  | ZPLOD846-20   | MIB:ZPL:08646    | BOLD:ABA9336  | 658[0n]     |                 | <i>Orthetrum chryso stigma</i> | adult      | Milano Bicocca      | Giacomo Assandri     | Morocco; 28.5, -10        |
| MW490285  | GBODO033-18   | GBOL 20156       | BOLD:AAI2353  | 658[0n]     | 21-Jun-2018     | <i>Orthetrum coerulescens</i>  | adult      | SNSB-ZSM            | Stefan Koch          | Germany; 48.1197, 10.4546 |
| HM901873  | FBAQU506-10   | BC ZSM AQU 00411 | BOLD:AAI2353  | 641[0n]     | 18-Jun-2009     | <i>Orthetrum coerulescens</i>  | adult      | SNSB-ZSM            | S. V. Ober           | Germany; 48.236, 11.505   |
| MW490386  | GBODO057-18   | GBOL 20180       | BOLD:AAI2353  | 592[2n]     | 04-Jul-2018     | <i>Orthetrum coerulescens</i>  | adult      | SNSB-ZSM            | Stefan Koch          | Germany; 48.3537, 11.775  |
| HM422051  | FBAQU320-09   | BC ZSM AQU 00320 | BOLD:AAI2353  | 658[0n]     | 17-Jun-2009     | <i>Orthetrum coerulescens</i>  | adult      | SNSB-ZSM            | M. Schoen            | Germany; 48.376, 11.842   |
| MW490473  | GBEPT937-14   | GBOL05507        | BOLD:AAI2353  | 658[0n]     | 08-Jun-2014     | <i>Orthetrum coerulescens</i>  | adult      | SNSB-ZSM            | Michael Franzen      | Germany; 48.378, 11.841   |
| MW490263  | GBEPT941-14   | GBOL05511        | BOLD:AAI2353  | 658[0n]     | 08-Jun-2014     | <i>Orthetrum coerulescens</i>  | adult      | SNSB-ZSM            | Michael Franzen      | Germany; 48.378, 11.841   |
| MW490525  | ZMBN329-16    | ZMBN-Ent14       | BOLD:AAI2353  | 658[0n]     | 23-Jun-2016     | <i>Orthetrum coerulescens</i>  |            | Bergen              | Steffen Roth         | Norway; 59.7137, 5.2176   |
| MW490508  | PLSW047-20    | ODOPL_181        | BOLD:AAI2353  | 658[0n]     | 13-Jun-2019     | <i>Orthetrum coerulescens</i>  | adult      | Lodz                | Grzegorz Tonczyk     | Poland; 54.103, 23.032    |
| MW490384  | PLSW048-20    | ODOPL_182        | BOLD:AAI2353  | 658[0n]     | 13-Jun-2019     | <i>Orthetrum coerulescens</i>  | adult      | Lodz                | Grzegorz Tonczyk     | Poland; 54.103, 23.032    |
| MW490520  | PLSW049-20    | ODOPL_183        | BOLD:AAI2353  | 658[0n]     | 13-Jun-2019     | <i>Orthetrum coerulescens</i>  | adult      | Lodz                | Grzegorz Tonczyk     | Poland; 54.103, 23.032    |
| MT298585  | ZPLOD663-20   | MIB:ZPL:08463    | BOLD:AEC4264  | 658[0n]     | 13-Jul-2019     | <i>Orthetrum nitidinerve</i>   | adult      | Giacomo Assandri    | Giacomo Assandri     | Italy; 39.8, 9            |
| MT298584  | ZPLOD661-20   | MIB:ZPL:08461    | BOLD:AEC4264  | 658[0n]     | 09-Jul-2019     | <i>Orthetrum nitidinerve</i>   | adult      | Giacomo Assandri    | Giacomo Assandri     | Italy; 40.2, 8.9          |
| MT298588  | ZPLOD667-20   | MIB:ZPL:08467    | BOLD:ABA9397  | 658[0n]     |                 | <i>Orthetrum trinacria</i>     | adult      | Milano Bicocca      | Giacomo Assandri     | Italy; 37.5, 14.9         |
| MT298587  | ZPLOD668-20   | MIB:ZPL:08468    | BOLD:ABA9397  | 658[0n]     |                 | <i>Orthetrum trinacria</i>     | adult      | Milano Bicocca      | Giacomo Assandri     | Italy; 37.7, 12.8         |
| MT298586  | ZPLOD665-20   | MIB:ZPL:08465    | BOLD:ABA9397  | 658[0n]     |                 | <i>Orthetrum trinacria</i>     | adult      | Giacomo Assandri    | Giacomo Assandri     | Italy; 40.8, 8.5          |
| KX241515  | GBMIN88646-17 | KX241515         | BOLD:ADDC4889 | 692[0n]     |                 | <i>Oxygastra curtisii</i>      |            | GenBank, NCBI       |                      | 0 Italy; ,                |
| MT298591  | ZPLOD676-20   | MIB:ZPL:08476    | BOLD:ABW0140  | 658[0n]     |                 | <i>Paragomphus genei</i>       | adult      | Milano Bicocca      | Giacomo Assandri     | Italy; 37.6, 13.1         |
| MT298592  | ZPLOD675-20   | MIB:ZPL:08475    | BOLD:ABW0140  | 658[0n]     |                 | <i>Paragomphus genei</i>       | adult      | Giacomo Assandri    | Giacomo Assandri     | Italy; 40.3, 9.5          |
| MT298593  | ZPLOD674-20   | MIB:ZPL:08474    | BOLD:ABW0140  | 658[0n]     |                 | <i>Paragomphus genei</i>       | adult      | Giacomo Assandri    | Giacomo Assandri     | Italy; 40.7, 9            |
| MW490186  | GBODO161-18   | GBOL 20284       |               | 318[1n]     | 12-May-2018     | <i>Platycnemis pennipes</i>    | adult      | SNSB-ZSM            | Stefan Koch          | Germany; 48.0616, 10.6428 |
| MW490179  | GBODO055-18   | GBOL 20178       |               | 315[1n]     | 04-Jul-2018     | <i>Platycnemis pennipes</i>    | adult      | SNSB-ZSM            | Stefan Koch          | Germany; 48.3537, 11.775  |
| MW490449  | GODO023-18    | ZFMK-TIS-2010623 | BOLD:ACG0515  | 658[0n]     | 30-May-2017     | <i>Platycnemis pennipes</i>    | adult      | ZFMK                | T. Sellmeier         | Germany; 50.777, 7.365    |
| MW490180  | GODO027-18    | ZFMK-TIS-2010635 | BOLD:ACG0515  | 658[0n]     | 27-Jun-2017     | <i>Platycnemis pennipes</i>    | adult      | ZFMK                | T. Sellmeier         | Germany; 50.8, 7.585      |

| GenBank # | Process ID  | Sample ID        | BIN          | Seq. Length | Collection Date | Identification                    | Life Stage | Institution (short) | Identifier       | country; GPS              |
|-----------|-------------|------------------|--------------|-------------|-----------------|-----------------------------------|------------|---------------------|------------------|---------------------------|
| MW490514  | GODO030-18  | ZFMK-TIS-2010638 | BOLD:ACG0515 | 658[0n]     | 11-Jul-2017     | <i>Platycnemis pennipes</i>       | adult      | ZFMK                | T. Sellmeier     | Germany; 50.8, 7.585      |
| KF369498  | ODOPH289-13 | RMNH.INS.228274  | BOLD:ACG0515 | 658[0n]     |                 | <i>Platycnemis pennipes</i>       | adult      | Leiden              |                  | 0 Netherlands; ,          |
| MW490280  | PLSW079-20  | ODOPL_213        | BOLD:ACG0515 | 585[2n]     | 07-Aug-2019     | <i>Platycnemis pennipes</i>       | adult      | Lodz                | Grzegorz Tonczyk | Poland; 49.429, 21.859    |
| MW490153  | PLSW080-20  | ODOPL_214        | BOLD:ACG0515 | 643[2n]     | 07-Aug-2019     | <i>Platycnemis pennipes</i>       | adult      | Lodz                | Grzegorz Tonczyk | Poland; 49.429, 21.859    |
| MW490351  | PLSW015-20  | ODOPL_149        | BOLD:ACG0515 | 658[0n]     | 12-Jun-2019     | <i>Platycnemis pennipes</i>       | adult      | Lodz                | Grzegorz Tonczyk | Poland; 54.112, 23.043    |
| MW490494  | PLSW050-20  | ODOPL_184        | BOLD:ACG0515 | 658[0n]     | 12-Jun-2019     | <i>Platycnemis pennipes</i>       | adult      | Lodz                | Grzegorz Tonczyk | Poland; 54.112, 23.043    |
| MW490465  | GBUPS203-14 | GBOL02853        | BOLD:AAD5734 | 683[0n]     |                 | <i>Pyrrhosoma nymphula</i>        | adult      | SNSB-ZSM            | Lars Hendrich    | Germany; ,                |
| MW490106  | GBUPS204-14 | GBOL02854        | BOLD:AAD5734 | 684[0n]     |                 | <i>Pyrrhosoma nymphula</i>        | adult      | SNSB-ZSM            | Lars Hendrich    | Germany; ,                |
| MW490308  | GBODO098-18 | GBOL 20221       | BOLD:AAD5734 | 658[0n]     | 12-Jul-2018     | <i>Pyrrhosoma nymphula</i>        | adult      | SNSB-ZSM            | Stefan Koch      | Germany; 47.6668, 11.0506 |
| MW490339  | GBODO152-18 | GBOL 20275       | BOLD:AAD5734 | 658[0n]     | 21-May-2018     | <i>Pyrrhosoma nymphula</i>        | adult      | SNSB-ZSM            | Stefan Koch      | Germany; 47.7561, 11.3698 |
| HM901876  | FBAQU511-10 | BC ZSM AQU 00416 | BOLD:AAD5734 | 612[0n]     | 29-Jul-2009     | <i>Pyrrhosoma nymphula</i>        | adult      | SNSB-ZSM            | S. V. Ober       | Germany; 47.766, 12.816   |
| HM901899  | FBAQU547-10 | BC ZSM AQU 00452 | BOLD:AAD5734 | 612[0n]     | 16-Sep-2009     | <i>Pyrrhosoma nymphula</i>        | larvae     | SNSB-ZSM            | Monika Hess      | Germany; 47.896, 12.166   |
| HM901875  | FBAQU510-10 | BC ZSM AQU 00415 | BOLD:AAD5734 | 612[0n]     | 16-Jul-2009     | <i>Pyrrhosoma nymphula</i>        | adult      | SNSB-ZSM            | S. V. Ober       | Germany; 47.909, 11.523   |
| HM901874  | FBAQU509-10 | BC ZSM AQU 00414 | BOLD:AAD5734 | 612[0n]     | 25-May-2009     | <i>Pyrrhosoma nymphula</i>        | adult      | SNSB-ZSM            | S. V. Ober       | Germany; 48.107, 11.458   |
| GU682172  | FBAQU321-09 | BC ZSM AQU 00321 | BOLD:AAD5734 | 658[0n]     | 20-May-2009     | <i>Pyrrhosoma nymphula</i>        | adult      | SNSB-ZSM            | M. Schoen        | Germany; 48.302, 11.817   |
| MW490341  | GBEPT916-14 | GBOL05486        | BOLD:AAD5734 | 658[0n]     | 22-May-2014     | <i>Pyrrhosoma nymphula</i>        | adult      | SNSB-ZSM            | Michael Franzen  | Germany; 48.378, 11.841   |
| MW490499  | GBEPT917-14 | GBOL05487        | BOLD:AAD5734 | 658[0n]     | 22-May-2014     | <i>Pyrrhosoma nymphula</i>        | adult      | SNSB-ZSM            | Michael Franzen  | Germany; 48.378, 11.841   |
| GU682191  | FBAQU202-09 | BC ZSM AQU 00202 | BOLD:AAD5734 | 658[0n]     | 07-Aug-2009     | <i>Pyrrhosoma nymphula</i>        | larvae     | SNSB-ZSM            | Monika Hess      | Germany; 49.099, 13.155   |
| MW490401  | GODO026-18  | ZFMK-TIS-2010626 | BOLD:AAD5734 | 658[0n]     | 30-May-2017     | <i>Pyrrhosoma nymphula</i>        | adult      | ZFMK                | T. Sellmeier     | Germany; 50.8, 7.585      |
| MW490431  | TRDOD015-14 | TRD-ODO33        | BOLD:AAD5734 | 658[0n]     | 05-Jun-2014     | <i>Pyrrhosoma nymphula</i>        | adult      | NTNU                | Jon K. Skei      | Norway; 63.217, 10.307    |
| MW490357  | TRDOD014-14 | TRD-ODO32        | BOLD:AAD5734 | 658[0n]     | 01-Jul-2014     | <i>Pyrrhosoma nymphula</i>        | adult      | NTNU                | Jon K. Skei      | Norway; 63.374, 10.286    |
| MW490504  | TRDOD070-14 | TRD-ODO88        | BOLD:AAD5734 | 658[0n]     | 12-Jul-2014     | <i>Pyrrhosoma nymphula</i>        | adult      | NTNU                | Jon K. Skei      | Norway; 63.543, 11.033    |
| MW490373  | ODTRI002-14 | TRD-ODO2         | BOLD:AAD5734 | 621[0n]     | 29-Jul-2010     | <i>Pyrrhosoma nymphula</i>        | adult      | NTNU                | Jon K. Skei      | Norway; 63.548, 10.996    |
| MW490089  | ODTRI003-14 | TRD-ODO3         | BOLD:AAD5734 | 624[0n]     | 15-Jun-2010     | <i>Pyrrhosoma nymphula</i>        | adult      | NTNU                | Jon K. Skei      | Norway; 63.548, 10.996    |
| MW490345  | TRDOD071-14 | TRD-ODO89        | BOLD:AAD5734 | 658[0n]     | 22-Jul-2014     | <i>Pyrrhosoma nymphula</i>        | adult      | NTNU                | Jon K. Skei      | Norway; 63.548, 10.996    |
| MT298608  | ZPLOD700-20 | MIB:ZPL:08500    | BOLD:AAE9139 | 658[0n]     |                 | <i>Selysiothemis nigra</i>        | adult      | Milano Bicocca      | Giacomo Assandri | Italy; 37.5, 14.9         |
| MT298607  | ZPLOD703-20 | MIB:ZPL:08503    | BOLD:AAE9139 | 658[0n]     |                 | <i>Selysiothemis nigra</i>        | adult      | Milano Bicocca      | Giacomo Assandri | Italy; 41.8, 15           |
| MT298609  | ZPLOD701-20 | MIB:ZPL:08501    | BOLD:AAE9139 | 658[0n]     |                 | <i>Selysiothemis nigra</i>        | adult      | Giacomo Assandri    | Giacomo Assandri | Italy; 44.7, 12.2         |
| MT298611  | ZPLOD709-20 | MIB:ZPL:08509    | BOLD:ACP5227 | 658[0n]     |                 | <i>Somatochlora alpestris</i>     | adult      | Giacomo Assandri    | Giacomo Assandri | Italy; 46.1, 9.6          |
| MT298610  | ZPLOD710-20 | MIB:ZPL:08510    | BOLD:ACP5227 | 658[0n]     |                 | <i>Somatochlora alpestris</i>     | adult      | Milano Bicocca      | Giacomo Assandri | Italy; 46.4, 9.4          |
| MT298613  | ZPLOD706-20 | MIB:ZPL:08506    | BOLD:ACP5227 | 658[0n]     |                 | <i>Somatochlora alpestris</i>     | adult      | Milano Bicocca      | Giacomo Assandri | Italy; 46.5, 11.1         |
| MT298612  | ZPLOD707-20 | MIB:ZPL:08507    | BOLD:ACP5227 | 658[0n]     |                 | <i>Somatochlora alpestris</i>     | adult      | Milano Bicocca      | Giacomo Assandri | Italy; 46.5, 12.7         |
| MW490105  | TRDOD064-14 | TRD-ODO82        | BOLD:ACP7013 | 658[0n]     | 24-Jul-2010     | <i>Somatochlora arctica</i>       | adult      | NTNU                | Jon K. Skei      | Norway; 63.321, 10.638    |
| MW490328  | TRDOD045-14 | TRD-ODO63        | BOLD:ACP7013 | 658[0n]     | 02-Aug-2014     | <i>Somatochlora arctica</i>       | adult      | NTNU                | Jon K. Skei      | Norway; 63.541, 11.033    |
| MW490527  | TRDOD046-14 | TRD-ODO64        | BOLD:ACP7013 | 618[0n]     | 02-Aug-2014     | <i>Somatochlora arctica</i>       | adult      | NTNU                | Jon K. Skei      | Norway; 63.541, 11.033    |
| MW490146  | TRDOD047-14 | TRD-ODO65        | BOLD:ACP7013 | 658[0n]     | 02-Aug-2014     | <i>Somatochlora arctica</i>       | adult      | NTNU                | Jon K. Skei      | Norway; 63.541, 11.033    |
| MW490131  | GBODO081-18 | GBOL 20204       | BOLD:AEC6167 | 315[0n]     | 12-Jul-2018     | <i>Somatochlora flavomaculata</i> | adult      | SNSB-ZSM            | Stefan Koch      | Germany; 47.6668, 11.0506 |
| MW490298  | GBODO022-18 | GBOL 20145       | BOLD:AEC6167 | 315[0n]     | 27-Jul-2018     | <i>Somatochlora flavomaculata</i> | adult      | SNSB-ZSM            | Stefan Koch      | Germany; 47.8252, 11.3012 |
| HM901900  | FBAQU548-10 | BC ZSM AQU 00453 | BOLD:AEC6167 | 513[0n]     | 16-Jul-2009     | <i>Somatochlora flavomaculata</i> | adult      | SNSB-ZSM            | F. Weihrauch     | Germany; 47.895, 12.167   |
| MW490082  | GBODO027-18 | GBOL 20150       | BOLD:AEC6167 | 311[0n]     | 27-Jul-2018     | <i>Somatochlora flavomaculata</i> | adult      | SNSB-ZSM            | Stefan Koch      | Germany; 47.9229, 11.5085 |
| MW490441  | GBODO107-18 | GBOL 20230       | BOLD:AEC6167 | 315[0n]     | 19-Jul-2018     | <i>Somatochlora flavomaculata</i> | adult      | SNSB-ZSM            | Stefan Koch      | Germany; 47.9229, 11.5085 |

| GenBank # | Process ID    | Sample ID        | BIN          | Seq. Length | Collection Date | Identification                    | Life Stage | Institution (short) | Identifier       | country; GPS              |
|-----------|---------------|------------------|--------------|-------------|-----------------|-----------------------------------|------------|---------------------|------------------|---------------------------|
| MW490367  | GBODO121-18   | GBOL_20244       | BOLD:AEC6167 | 312[0n]     | 19-Jul-2018     | <i>Somatochlora flavomaculata</i> | adult      | SNSB-ZSM            | Stefan Koch      | Germany; 47.9229, 11.5085 |
| MW490086  | PLSW020-20    | ODOPL_154        | BOLD:AEC6167 | 658[0n]     | 21-Jun-2019     | <i>Somatochlora flavomaculata</i> | adult      | Lodz                | Grzegorz Tonczyk | Poland; 50.015, 20.281    |
| MW490211  | PLSW084-20    | ODOPL_218        | BOLD:AEC6167 | 654[0n]     | 30-Jun-2019     | <i>Somatochlora flavomaculata</i> | adult      | Lodz                | Grzegorz Tonczyk | Poland; 54.613, 18.51     |
| MW490461  | PLSW085-20    | ODOPL_219        | BOLD:AEC6167 | 658[0n]     | 30-Jun-2019     | <i>Somatochlora flavomaculata</i> | adult      | Lodz                | Grzegorz Tonczyk | Poland; 54.613, 18.51     |
| MT298621  | ZPLOD720-20   | MIB:ZPL:08520    | BOLD:ABW6681 | 658[0n]     |                 | <i>Somatochlora meridionalis</i>  | adult      | Milano Bicocca      | Giacomo Assandri | Italy; 41.5, 13.3         |
| MT298623  | ZPLOD722-20   | MIB:ZPL:08522    | BOLD:ABW6681 | 658[0n]     |                 | <i>Somatochlora meridionalis</i>  | adult      | Milano Bicocca      | Giacomo Assandri | Italy; 42.9, 12.2         |
| MT298622  | ZPLOD721-20   | MIB:ZPL:08521    | BOLD:ABW6681 | 658[0n]     |                 | <i>Somatochlora meridionalis</i>  | adult      | Milano Bicocca      | Giacomo Assandri | Italy; 43.3, 13.5         |
| MT298626  | ZPLOD725-20   | MIB:ZPL:08525    | BOLD:ABW6681 | 658[0n]     |                 | <i>Somatochlora meridionalis</i>  | adult      | Giacomo Assandri    | Giacomo Assandri | Italy; 44.4, 8.1          |
| MT298627  | ZPLOD726-20   | MIB:ZPL:08526    | BOLD:ABW6681 | 658[0n]     |                 | <i>Somatochlora meridionalis</i>  | adult      | Giacomo Assandri    | Giacomo Assandri | Italy; 44.4, 8.1          |
| MT298628  | ZPLOD727-20   | MIB:ZPL:08527    | BOLD:ABW6681 | 658[0n]     |                 | <i>Somatochlora meridionalis</i>  | adult      | Milano Bicocca      | Giacomo Assandri | Italy; 44.4, 8.1          |
| MT298624  | ZPLOD723-20   | MIB:ZPL:08523    | BOLD:ABW6681 | 658[0n]     |                 | <i>Somatochlora meridionalis</i>  | adult      | Milano Bicocca      | Giacomo Assandri | Italy; 46, 13.6           |
| MT298625  | ZPLOD724-20   | MIB:ZPL:08524    | BOLD:ABW6681 | 658[0n]     |                 | <i>Somatochlora meridionalis</i>  | adult      | Milano Bicocca      | Giacomo Assandri | Italy; 46.2, 13.3         |
| MT298620  | ZPLOD837-20   | MIB:ZPL:08637    | BOLD:ABW6681 | 658[0n]     |                 | <i>Somatochlora meridionalis</i>  | adult      | Giacomo Assandri    | Giacomo Assandri | Montenegro; 42.2, 19.1    |
| MW490094  | GBODO071-18   | GBOL_20194       | BOLD:ABW6681 | 318[0n]     | 12-Jul-2018     | <i>Somatochlora metallica</i>     | adult      | SNSB-ZSM            | Stefan Koch      | Germany; 47.6668, 11.0506 |
| MW490335  | HETFI055-11   | FinHet55         | BOLD:ABW6681 | 658[0n]     | 30-Jul-2010     | <i>Somatochlora metallica</i>     | adult      | Bergen              | Steffen Roth     | Norway; 69.2133, 29.1536  |
| MW490093  | HETFI056-11   | FinHet56         | BOLD:ABW6681 | 658[0n]     | 31-Jul-2010     | <i>Somatochlora metallica</i>     | adult      | Bergen              | Steffen Roth     | Norway; 69.231, 29.1609   |
| MW490197  | HETFI053-11   | FinHet53         | BOLD:ABW6681 | 658[0n]     | 26-Jul-2010     | <i>Somatochlora metallica</i>     | adult      | Bergen              | Steffen Roth     | Norway; 70.1322, 24.7669  |
| AB708931  | GBMIN24739-13 | AB708931         | BOLD:ABW6681 | 451[0n]     | 31-Jul-2001     | <i>Somatochlora metallica</i>     |            | GenBank, NCBI       |                  | 0 Sweden; ,               |
| MT298633  | ZPLOD733-20   | MIB:ZPL:08533    | BOLD:ADC2840 | 658[0n]     |                 | <i>Stylurus flavipes</i>          | adult      | Giacomo Assandri    | Giacomo Assandri | Italy; 45.3, 9            |
| MW490267  | FBAQU1426-13  | GBOL00270        | BOLD:AAK1032 | 658[0n]     | 02-Aug-2011     | <i>Sympecma fusca</i>             | adult      | SNSB-ZSM            | Stefan Koch      | Germany; 47.7952, 11.3061 |
| MW490497  | GBODO158-18   | GBOL_20281       | BOLD:AAK1032 | 658[0n]     | 14-Apr-2018     | <i>Sympecma fusca</i>             | adult      | SNSB-ZSM            | Stefan Koch      | Germany; 48.0616, 10.6428 |
| MW490474  | GBODO159-18   | GBOL_20282       | BOLD:AAK1032 | 658[0n]     | 12-May-2018     | <i>Sympecma fusca</i>             | adult      | SNSB-ZSM            | Stefan Koch      | Germany; 48.0616, 10.6428 |
| MW490235  | GBODO162-18   | GBOL_20285       | BOLD:AAK1032 | 658[0n]     | 12-May-2018     | <i>Sympecma fusca</i>             | adult      | SNSB-ZSM            | Stefan Koch      | Germany; 48.0616, 10.6428 |
| MW490101  | GBODO163-18   | GBOL_20286       | BOLD:AAK1032 | 450[4n]     | 12-May-2018     | <i>Sympecma fusca</i>             | adult      | SNSB-ZSM            | Stefan Koch      | Germany; 48.0616, 10.6428 |
| MW490264  | GBODO164-18   | GBOL_20287       | BOLD:AAK1032 | 658[0n]     | 12-May-2018     | <i>Sympecma fusca</i>             | adult      | SNSB-ZSM            | Stefan Koch      | Germany; 48.0616, 10.6428 |
| MW490128  | GBODO185-18   | GBOL_20308       | BOLD:AAK1032 | 658[0n]     | 14-Apr-2018     | <i>Sympecma fusca</i>             | adult      | SNSB-ZSM            | Stefan Koch      | Germany; 48.0616, 10.6428 |
| HM901877  | FBAQU515-10   | BC ZSM AQU 00420 | BOLD:AAK1032 | 658[0n]     | 21-May-2009     | <i>Sympecma fusca</i>             | adult      | SNSB-ZSM            | S. V. Ober       | Germany; 48.107, 11.458   |
| HM422052  | FBAQU322-09   | BC ZSM AQU 00322 | BOLD:AAK1032 | 658[0n]     | 23-May-2009     | <i>Sympecma fusca</i>             | adult      | SNSB-ZSM            | M. Schoen        | Germany; 48.338, 11.803   |
| MW490387  | GBEPT935-14   | GBOL05505        | BOLD:AAK1032 | 658[0n]     | 22-May-2014     | <i>Sympecma fusca</i>             | adult      | SNSB-ZSM            | Michael Franzen  | Germany; 48.378, 11.841   |
| MW490457  | GBEPT936-14   | GBOL05506        | BOLD:AAK1032 | 658[0n]     | 22-May-2014     | <i>Sympecma fusca</i>             | adult      | SNSB-ZSM            | Michael Franzen  | Germany; 48.378, 11.841   |
| MW490162  | FBAQU1444-13  | GBOL00288        | BOLD:ACG0335 | 655[0n]     | 20-May-2012     | <i>Sympecma paedisca</i>          | adult      | SNSB-ZSM            | Stefan Koch      | Germany; 47.6328, 10.5381 |
| MW490560  | GBEPT930-14   | GBOL05500        | BOLD:ACG0335 | 658[0n]     | 01-Jun-2014     | <i>Sympecma paedisca</i>          | adult      | SNSB-ZSM            | Michael Franzen  | Germany; 47.709, 10.852   |
| MW490423  | GBEPT931-14   | GBOL05501        | BOLD:ACG0335 | 658[0n]     | 01-Jun-2014     | <i>Sympecma paedisca</i>          | adult      | SNSB-ZSM            | Michael Franzen  | Germany; 47.709, 10.852   |
| MW490366  | GBEPT932-14   | GBOL05502        | BOLD:ACG0335 | 658[0n]     | 01-Jun-2014     | <i>Sympecma paedisca</i>          | adult      | SNSB-ZSM            | Michael Franzen  | Germany; 47.709, 10.852   |
| MW490220  | GBEPT933-14   | GBOL05503        | BOLD:ACG0335 | 658[0n]     | 01-Jun-2014     | <i>Sympecma paedisca</i>          | adult      | SNSB-ZSM            | Michael Franzen  | Germany; 47.709, 10.852   |
| MW490346  | GBEPT934-14   | GBOL05504        | BOLD:ACG0335 | 658[0n]     | 01-Jun-2014     | <i>Sympecma paedisca</i>          | adult      | SNSB-ZSM            | Michael Franzen  | Germany; 47.709, 10.852   |
| MW490223  | PLSW173-20    | ODOPL_238        | BOLD:ACG0335 | 658[0n]     | 11-Jul-2019     | <i>Sympecma paedisca</i>          | larvae     | Lodz                | Grzegorz Tonczyk | Poland; 54.042, 23.057    |
| MW490421  | PLSW174-20    | ODOPL_239        | BOLD:ACG0335 | 653[0n]     | 11-Jul-2019     | <i>Sympecma paedisca</i>          | larvae     | Lodz                | Grzegorz Tonczyk | Poland; 54.042, 23.057    |
| MW490470  | PLSW175-20    | ODOPL_240        | BOLD:ACG0335 | 620[2n]     | 11-Jul-2019     | <i>Sympecma paedisca</i>          | larvae     | Lodz                | Grzegorz Tonczyk | Poland; 54.042, 23.057    |
| MW490471  | GBODO016-18   | GBOL_20139       | BOLD:AAA3766 | 318[0n]     | 27-Jul-2018     | <i>Sympetrum danae</i>            | adult      | SNSB-ZSM            | Stefan Koch      | Germany; 47.8252, 11.3012 |
| HM901878  | FBAQU516-10   | BC ZSM AQU 00421 | BOLD:AAA3766 | 643[0n]     | 16-Jul-2009     | <i>Sympetrum danae</i>            | adult      | SNSB-ZSM            | S. V. Ober       | Germany; 47.909, 11.522   |



| GenBank # | Process ID   | Sample ID        | BIN          | Seq. Length | Collection Date | Identification                   | Life Stage | Institution (short) | Identifier       | country; GPS              |
|-----------|--------------|------------------|--------------|-------------|-----------------|----------------------------------|------------|---------------------|------------------|---------------------------|
| MW490244  | GBODO014-18  | GBOL_20137       | BOLD:AAA3766 | 318[1n]     | 27-Jul-2018     | <i>Sympetrum danae</i>           | adult      | SNSB-ZSM            | Stefan Koch      | Germany; 47.9229, 11.5085 |
| MW490334  | PLSW001-20   | ODOPL_135        | BOLD:AAA3766 | 658[0n]     | 11-Jul-2019     | <i>Sympetrum danae</i>           | adult      | Lodz                | Grzegorz Tonczyk | Poland; 54.042, 23.063    |
| MW490119  | PLSW002-20   | ODOPL_136        | BOLD:AAA3766 | 658[0n]     | 11-Jul-2019     | <i>Sympetrum danae</i>           | adult      | Lodz                | Grzegorz Tonczyk | Poland; 54.042, 23.063    |
| MW490531  | PLSW003-20   | ODOPL_137        | BOLD:AAA3766 | 653[0n]     | 11-Jul-2019     | <i>Sympetrum danae</i>           | adult      | Lodz                | Grzegorz Tonczyk | Poland; 54.042, 23.063    |
| MT298645  | ZPLOD749-20  | MIB:ZPL:08549    | BOLD:ACQ1493 | 658[0n]     |                 | <i>Sympetrum depressiusculum</i> | adult      | Milano Bicocca      | Giacomo Assandri | Italy; 45.1, 7.2          |
| MT298644  | ZPLOD752-20  | MIB:ZPL:08552    | BOLD:ACQ1493 | 658[0n]     |                 | <i>Sympetrum depressiusculum</i> | adult      | Giacomo Assandri    | Giacomo Assandri | Italy; 45.7, 9.4          |
| MT298647  | ZPLOD758-20  | MIB:ZPL:08558    | BOLD:ADI4820 | 658[0n]     |                 | <i>Sympetrum flaveolum</i>       | adult      | Milano Bicocca      | Giacomo Assandri | Italy; 42.4, 13.7         |
| MT298646  | ZPLOD757-20  | MIB:ZPL:08557    | BOLD:ADI4820 | 658[0n]     |                 | <i>Sympetrum flaveolum</i>       | adult      | Milano Bicocca      | Giacomo Assandri | Italy; 44.6, 9.5          |
| MT298649  | ZPLOD753-20  | MIB:ZPL:08553    | BOLD:ADI4820 | 658[0n]     |                 | <i>Sympetrum flaveolum</i>       | adult      | Milano Bicocca      | Giacomo Assandri | Italy; 45.8, 7.6          |
| HM901901  | FBAQU552-10  | BC ZSM AQU 00457 | BOLD:AAI0218 | 626[0n]     | 19-Sep-2009     | <i>Sympetrum fonscolombii</i>    | adult      | SNSB-ZSM            | K. Burbach       | Germany; 47.808, 11.458   |
| HM901879  | FBAQU517-10  | BC ZSM AQU 00422 | BOLD:AAI0218 | 606[0n]     | 25-May-2009     | <i>Sympetrum fonscolombii</i>    | adult      | SNSB-ZSM            | S. V. Ober       | Germany; 48.107, 11.458   |
| MW490426  | PLSW086-20   | ODOPL_220        | BOLD:AAI0218 | 658[0n]     | 01-Jul-2019     | <i>Sympetrum fonscolombii</i>    | adult      | Lodz                | Grzegorz Tonczyk | Poland; 54.788, 18.427    |
| MW490444  | PLSW087-20   | ODOPL_221        | BOLD:AAI0218 | 658[0n]     | 01-Jul-2019     | <i>Sympetrum fonscolombii</i>    | adult      | Lodz                | Grzegorz Tonczyk | Poland; 54.788, 18.427    |
| MW490374  | PLSW088-20   | ODOPL_222        | BOLD:AAI0218 | 658[0n]     | 01-Jul-2019     | <i>Sympetrum fonscolombii</i>    | adult      | Lodz                | Grzegorz Tonczyk | Poland; 54.788, 18.427    |
| MW490559  | GBEPT950-14  | GBOL05520        | BOLD:AAK1015 | 651[0n]     | 14-Jun-2014     | <i>Sympetrum meridionale</i>     | adult      | SNSB-ZSM            | Michael Franzen  | Austria; 48.132, 16.95    |
| HM901902  | FBAQU553-10  | BC ZSM AQU 00458 | BOLD:AAK1022 | 586[1n]     | 09-Jan-2009     | <i>Sympetrum pedemontanum</i>    | adult      | SNSB-ZSM            | F. Weihrauch     | Germany; 47.895, 12.167   |
| MW490257  | FBAQU323-09  | BC ZSM AQU 00323 | BOLD:AAK1022 | 487[0n]     | 15-Aug-2008     | <i>Sympetrum pedemontanum</i>    | adult      | SNSB-ZSM            | M. Schoen        | Germany; 48.339, 11.799   |
| MW490478  | FBAQU554-10  | BC ZSM AQU 00459 | BOLD:AAB2237 | 658[2n]     | 09-Jan-2009     | <i>Sympetrum sanguineum</i>      | adult      | SNSB-ZSM            | F. Weihrauch     | Germany; 47.895, 12.167   |
| HM901880  | FBAQU518-10  | BC ZSM AQU 00423 | BOLD:AAB2237 | 631[0n]     | 16-Jul-2009     | <i>Sympetrum sanguineum</i>      | adult      | SNSB-ZSM            | S. V. Ober       | Germany; 47.908, 11.523   |
| MW490210  | FBAQU324-09  | BC ZSM AQU 00324 | BOLD:AAB2237 | 428[0n]     | 16-Jul-2009     | <i>Sympetrum sanguineum</i>      | adult      | SNSB-ZSM            | M. Schoen        | Germany; 48.314, 11.818   |
| MW490516  | PLSW066-20   | ODOPL_200        | BOLD:AAB2237 | 658[0n]     | 25-Aug-2019     | <i>Sympetrum sanguineum</i>      | adult      | Lodz                | Grzegorz Tonczyk | Poland; 51.757, 19.4      |
| MW490476  | PLSW067-20   | ODOPL_201        | BOLD:AAB2237 | 632[0n]     | 25-Aug-2019     | <i>Sympetrum sanguineum</i>      | adult      | Lodz                | Grzegorz Tonczyk | Poland; 51.757, 19.4      |
| MW490150  | PLSW068-20   | ODOPL_202        | BOLD:AAB2237 | 658[0n]     | 25-Aug-2019     | <i>Sympetrum sanguineum</i>      | adult      | Lodz                | Grzegorz Tonczyk | Poland; 51.757, 19.4      |
| MW490284  | GBMIX3758-18 | GBOL19826        | BOLD:AAB2236 | 312[1n]     | 24-Sep-2017     | <i>Sympetrum striolatum</i>      | adult      | SNSB-ZSM            | Lars Hendrich    | Germany; 48.0342, 10.3834 |
| HM901881  | FBAQU519-10  | BC ZSM AQU 00424 | BOLD:AAB2236 | 641[0n]     | 09-Aug-2009     | <i>Sympetrum striolatum</i>      | adult      | SNSB-ZSM            | S. V. Ober       | Germany; 48.073, 11.541   |
| GU682171  | FBAQU325-09  | BC ZSM AQU 00325 | BOLD:AAB2236 | 658[0n]     | 02-Aug-2009     | <i>Sympetrum striolatum</i>      | adult      | SNSB-ZSM            | M. Schoen        | Germany; 48.34, 11.807    |
| MW490209  | ZMBN328-16   | ZMBN-Ent13       | BOLD:AAB2236 | 658[0n]     | 23-Jun-2016     | <i>Sympetrum striolatum</i>      |            | Bergen              | Steffen Roth     | Norway; 59.7137, 5.2176   |
| MW490551  | TRDOD085-14  | TRD-ODO103       | BOLD:AAB2236 | 429[0n]     | 30-Jul-2004     | <i>Sympetrum striolatum</i>      | adult      | NTNU                | Dag Dolmen       | Norway; 65.092, 11.911    |
| MW490084  | TRDOD086-14  | TRD-ODO104       | BOLD:AAB2236 | 658[5n]     | 30-Jul-2004     | <i>Sympetrum striolatum</i>      | adult      | NTNU                | Dag Dolmen       | Norway; 65.092, 11.911    |
| HM901903  | FBAQU555-10  | BC ZSM AQU 00460 | BOLD:AAE2658 | 599[0n]     | 16-Jul-2009     | <i>Sympetrum vulgatum</i>        | adult      | SNSB-ZSM            | F. Weihrauch     | Germany; 47.895, 12.167   |
| MW490543  | GBODO113-18  | GBOL_20236       | BOLD:AAE2658 | 658[0n]     | 19-Jul-2018     | <i>Sympetrum vulgatum</i>        | adult      | SNSB-ZSM            | Stefan Koch      | Germany; 47.9229, 11.5085 |
| HM901882  | FBAQU520-10  | BC ZSM AQU 00425 | BOLD:AAE2658 | 658[0n]     | 15-Aug-2009     | <i>Sympetrum vulgatum</i>        | adult      | SNSB-ZSM            | S. V. Ober       | Germany; 48.2, 11.485     |
| GU682170  | FBAQU326-09  | BC ZSM AQU 00326 | BOLD:AAE2658 | 658[0n]     | 16-Jul-2009     | <i>Sympetrum vulgatum</i>        | adult      | SNSB-ZSM            | M. Schoen        | Germany; 48.298, 11.822   |
| MW490266  | PLSW081-20   | ODOPL_215        | BOLD:AAE2658 | 658[0n]     | 07-Aug-2019     | <i>Sympetrum vulgatum</i>        | adult      | Lodz                | Grzegorz Tonczyk | Poland; 49.429, 21.859    |
| MW490405  | PLSW082-20   | ODOPL_216        | BOLD:AAE2658 | 658[0n]     | 07-Aug-2019     | <i>Sympetrum vulgatum</i>        | adult      | Lodz                | Grzegorz Tonczyk | Poland; 49.429, 21.859    |
| MW490462  | PLSW083-20   | ODOPL_217        | BOLD:AAE2658 | 658[0n]     | 07-Aug-2019     | <i>Sympetrum vulgatum</i>        | adult      | Lodz                | Grzegorz Tonczyk | Poland; 49.429, 21.859    |
| MT298674  | ZPLOD811-20  | MIB:ZPL:08611    | BOLD:ABA9471 | 658[0n]     |                 | <i>Trithemis annulata</i>        | adult      | Milano Bicocca      | Giacomo Assandri | Italy; 37.7, 12.8         |
| MT298673  | ZPLOD809-20  | MIB:ZPL:08609    | BOLD:ABA9471 | 658[0n]     |                 | <i>Trithemis annulata</i>        | adult      | Giacomo Assandri    | Giacomo Assandri | Italy; 45.4, 9.1          |
| MT298677  | ZPLOD848-20  | MIB:ZPL:08648    | BOLD:ABA9387 | 658[0n]     |                 | <i>Trithemis kirbyi</i>          | adult      | Milano Bicocca      | Giacomo Assandri | Morocco; 28.5, -10        |
| MT298678  | ZPLOD847-20  | MIB:ZPL:08647    | BOLD:ABA9387 | 658[0n]     |                 | <i>Trithemis kirbyi</i>          | adult      | Giacomo Assandri    | Giacomo Assandri | Morocco; 29.1, -10.3      |
| MT298679  | ZPLOD812-20  | MIB:ZPL:08612    | BOLD:AAZ4163 | 658[0n]     |                 | <i>Zygonyx torridus</i>          | adult      | Milano Bicocca      | Giacomo Assandri | Italy; 37.7, 12.9         |
