# Supplementary material for: Coverage and quality of DNA barcode references for Central and Northern European Odonata
Source: PeerJ journal article supplement (doi:10.7717/peerj.11192), 2021-05-03
Supplement: suppl_file_S2.pdf [file suppl_file_S2.pdf]

| Family           | Species                           | # individuals | countries | Mean Intra-Sp | Max Intra-Sp | Nearest Species                  | Nearest Neighbour | Distance to NN |
|------------------|-----------------------------------|---------------|-----------|---------------|--------------|----------------------------------|-------------------|----------------|
| Aeshnidae        | <i>Aeshna affinis</i>             | 5             | 3         | 0.18          | 0.31         | <i>Aeshna mixta</i>              | FBAQU480-10       | 7.49           |
| Aeshnidae        | <i>Aeshna caerulea</i>            | 5             | 2         | 0.15          | 0.32         | <i>Aeshna subarctica</i>         | GBODO045-18       | 5.88           |
| Aeshnidae        | <i>Aeshna cyanea</i>              | 7             | 3         | 0.26          | 0.47         | <i>Aeshna mixta</i>              | GODO046-19        | 6.22           |
| Aeshnidae        | <i>Aeshna grandis</i>             | 9             | 3         | 0.19          | 0.33         | <i>Aeshna viridis</i>            | GBMIN88539-17     | 2.08           |
| Aeshnidae        | <i>Aeshna isocles</i>             | 5             | 3         | 0.44          | 1.1          | <i>Aeshna caerulea</i>           | TRDOD067-14       | 8.26           |
| Aeshnidae        | <i>Aeshna juncea</i>              | 9             | 2         | 0.38          | 0.93         | <i>Aeshna subarctica</i>         | TRDOD062-14       | 3.01           |
| Aeshnidae        | <i>Aeshna mixta</i>               | 4             | 2         | 0.28          | 0.48         | <i>Aeshna subarctica</i>         | GBMIN88537-17     | 6.1            |
| Aeshnidae        | <i>Aeshna subarctica</i>          | 9             | 2         | 0.2           | 0.5          | <i>Aeshna juncea</i>             | GBODO009-18       | 3.01           |
| Aeshnidae        | <i>Aeshna viridis</i>             | 2             | 1         | 0.34          | 0.34         | <i>Aeshna grandis</i>            | ODOPL066-19       | 2.08           |
| Aeshnidae        | <i>Anax ephippiger</i>            | 2             | 1         | 1.24          | 1.24         | <i>Anax imperator</i>            | FBAQU481-10       | 6.35           |
| Aeshnidae        | <i>Anax imperator</i>             | 12            | 2         | 0.35          | 0.93         | <i>Anax parthenope</i>           | ODOPL134-19       | 0.55           |
| Aeshnidae        | <i>Anax parthenope</i>            | 6             | 3         | 0.56          | 0.77         | <i>Anax imperator</i>            | FBAQU481-10       | 0.55           |
| Aeshnidae        | <i>Boyeria irene</i>              | 1             | 1         | N/A           | 0            | <i>Aeshna subarctica</i>         | GBMIN88537-17     | 8.1            |
| Aeshnidae        | <i>Brachytron pratense</i>        | 8             | 3         | 0.16          | 0.66         | <i>Caliaeschna microstigma</i>   | ZPLOD815-20       | 7.9            |
| Aeshnidae        | <i>Caliaeschna microstigma</i>    | 1             | 1         | N/A           | 0            | <i>Aeshna mixta</i>              | GODO046-19        | 7.39           |
| Calopterygidae   | <i>Calopteryx haemorrhoidalis</i> | 1             | 1         | N/A           | 0            | <i>Calopteryx splendens</i>      | ODOPL034-19       | 15.37          |
| Calopterygidae   | <i>Calopteryx splendens</i>       | 16            | 2         | 0.5           | 1.31         | <i>Calopteryx xanthostoma</i>    | ZPLOD124-20       | 0              |
| Calopterygidae   | <i>Calopteryx virgo</i>           | 4             | 2         | 0             | 0            | <i>Calopteryx splendens</i>      | GODO025-18        | 9.33           |
| Calopterygidae   | <i>Calopteryx xanthostoma</i>     | 2             | 1         | 0             | 0            | <i>Calopteryx splendens</i>      | GODO022-18        | 0              |
| Coenagrionidae   | <i>Ceragrion tenellum</i>         | 7             | 1         | 0.18          | 0.31         | <i>Pyrrhosoma nymphula</i>       | ODTRI003-14       | 16.22          |
| Coenagrionidae   | <i>Coenagrion armatum</i>         | 4             | 1         | 0             | 0            | <i>Coenagrion hastulatum</i>     | PLSW010-20        | 9.28           |
| Coenagrionidae   | <i>Coenagrion caerulescens</i>    | 8             | 1         | 1.44          | 2.34         | <i>Coenagrion scitulum</i>       | GBEPT907-14       | 9.21           |
| Coenagrionidae   | <i>Coenagrion hastulatum</i>      | 9             | 3         | 0.17          | 0.68         | <i>Coenagrion armatum</i>        | TRDOD019-14       | 9.28           |
| Coenagrionidae   | <i>Coenagrion johanssoni</i>      | 5             | 1         | 0             | 0            | <i>Coenagrion armatum</i>        | TRDOD019-14       | 10.36          |
| Coenagrionidae   | <i>Coenagrion mercuriale</i>      | 2             | 1         | 0             | 0            | <i>Coenagrion pulchellum</i>     | ODTRI008-14       | 9.38           |
| Coenagrionidae   | <i>Coenagrion ornatum</i>         | 5             | 1         | 0.06          | 0.15         | <i>Coenagrion puella</i>         | ODOPL104-19       | 0              |
| Coenagrionidae   | <i>Coenagrion puella</i>          | 26            | 2         | 0.08          | 0.49         | <i>Coenagrion ornatum</i>        | FBAQU310-09       | 0              |
| Coenagrionidae   | <i>Coenagrion pulchellum</i>      | 27            | 3         | 0.65          | 2.79         | <i>Coenagrion puella</i>         | ODOPL104-19       | 0              |
| Coenagrionidae   | <i>Coenagrion scitulum</i>        | 4             | 2         | 0.08          | 0.15         | <i>Coenagrion caerulescens</i>   | ZPLOD197-20       | 9.21           |
| Coenagrionidae   | <i>Enallagma cyathigerum</i>      | 36            | 3         | 0.21          | 1.17         | <i>Ischnura elegans</i>          | ODOPL087-19       | 13.86          |
| Coenagrionidae   | <i>Erythromma lindenii</i>        | 2             | 1         | 0             | 0            | <i>Erythromma najas</i>          | FBAQU492-10       | 16.04          |
| Coenagrionidae   | <i>Erythromma najas</i>           | 14            | 3         | 0.21          | 0.66         | <i>Erythromma viridulum</i>      | GBMIX949-14       | 15.06          |
| Coenagrionidae   | <i>Erythromma viridulum</i>       | 8             | 2         | 0.46          | 1.87         | <i>Erythromma najas</i>          | FBAQU563-10       | 15.06          |
| Coenagrionidae   | <i>Ischnura elegans</i>           | 49            | 5         | 0.18          | 1.83         | <i>Ischnura saharensis</i>       | ZPLOD844-20       | 0              |
| Coenagrionidae   | <i>Ischnura genei</i>             | 3             | 1         | 0.2           | 0.31         | <i>Ischnura elegans</i>          | TRDOD090-14       | 0              |
| Coenagrionidae   | <i>Ischnura pumilio</i>           | 4             | 1         | 0             | 0            | <i>Ischnura elegans</i>          | TRDOD090-14       | 14.35          |
| Coenagrionidae   | <i>Ischnura saharensis</i>        | 2             | 1         | 0.31          | 0.31         | <i>Ischnura elegans</i>          | ODOPL088-19       | 0              |
| Coenagrionidae   | <i>Nehalennia speciosa</i>        | 9             | 2         | 0             | 0            | <i>Pyrrhosoma nymphula</i>       | FBAQU510-10       | 15.72          |
| Coenagrionidae   | <i>Pyrrhosoma nymphula</i>        | 19            | 2         | 0.16          | 0.66         | <i>Leucorrhinia albifrons</i>    | EDF004-18         | 14.65          |
| Cordulegastridae | <i>Cordulegaster bidentata</i>    | 1             | 1         | N/A           | 0            | <i>Cordulegaster trinacriae</i>  | ZPLOD315-20       | 8.31           |
| Cordulegastridae | <i>Cordulegaster boltonii</i>     | 8             | 3         | 0             | 0            | <i>Cordulegaster trinacriae</i>  | ZPLOD314-20       | 5.37           |
| Cordulegastridae | <i>Cordulegaster heros</i>        | 3             | 2         | 0.15          | 0.15         | <i>Cordulegaster picta</i>       | GBMIN88645-17     | 6.67           |
| Cordulegastridae | <i>Cordulegaster picta</i>        | 1             | 1         | N/A           | 0            | <i>Cordulegaster heros</i>       | EDF003-18         | 6.67           |
| Cordulegastridae | <i>Cordulegaster trinacriae</i>   | 2             | 1         | 0.15          | 0.15         | <i>Cordulegaster boltonii</i>    | FBAQU531-10       | 5.37           |
| Corduliidae      | <i>Cordulia aenea</i>             | 16            | 4         | 2.4           | 4.69         | <i>Somatochlora alpestris</i>    | ZPLOD706-20       | 10.73          |
| Corduliidae      | <i>Epitheca bimaculata</i>        | 1             | 1         | N/A           | 0            | <i>Somatochlora alpestris</i>    | ZPLOD706-20       | 12.7           |
| Corduliidae      | <i>Somatochlora alpestris</i>     | 4             | 1         | 0.08          | 0.15         | <i>Somatochlora arctica</i>      | TRDOD064-14       | 4.27           |
| Corduliidae      | <i>Somatochlora arctica</i>       | 4             | 1         | 0.24          | 0.49         | <i>Somatochlora alpestris</i>    | ZPLOD706-20       | 4.27           |
| Corduliidae      | <i>Somatochlora flavomaculata</i> | 9             | 2         | 0.44          | 0.99         | <i>Somatochlora arctica</i>      | TRDOD064-14       | 7.48           |
| Corduliidae      | <i>Somatochlora meridionalis</i>  | 9             | 2         | 0.52          | 0.92         | <i>Somatochlora metallica</i>    | HETFI055-11       | 0.31           |
| Corduliidae      | <i>Somatochlora metallica</i>     | 5             | 3         | 0             | 0            | <i>Somatochlora meridionalis</i> | ZPLOD723-20       | 0.31           |
| Gomphidae        | <i>Gomphus pulchellus</i>         | 1             | 1         | N/A           | 0            | <i>Ophiogomphus cecilia</i>      | ODOPL039-19       | 13.97          |
| Gomphidae        | <i>Gomphus schneiderii</i>        | 2             | 1         | 0.15          | 0.15         | <i>Gomphus vulgatissimus</i>     | FBAQU1445-13      | 0.72           |
| Gomphidae        | <i>Gomphus simillimus</i>         | 1             | 1         | N/A           | 0            | <i>Gomphus vulgatissimus</i>     | GBMIX410-14       | 6.62           |
| Gomphidae        | <i>Gomphus vulgatissimus</i>      | 13            | 2         | 0.22          | 0.79         | <i>Gomphus schneiderii</i>       | ZPLOD824-20       | 0.72           |
| Gomphidae        | <i>Lindenia tetraphylla</i>       | 5             | 1         | 0.09          | 0.15         | <i>Paragomphus genei</i>         | ZPLOD676-20       | 16.16          |
| Gomphidae        | <i>Onychogomphus forcipatus</i>   | 24            | 4         | 1.44          | 2.97         | <i>Caliaeschna microstigma</i>   | ZPLOD815-20       | 11.01          |
| Gomphidae        | <i>Onychogomphus uncatus</i>      | 4             | 1         | 0.08          | 0.15         | <i>Ophiogomphus cecilia</i>      | GBMIX418-14       | 12.52          |
| Gomphidae        | <i>Ophiogomphus cecilia</i>       | 10            | 3         | 0.36          | 0.98         | <i>Onychogomphus uncatus</i>     | ZPLOD581-20       | 12.52          |
| Gomphidae        | <i>Paragomphus genei</i>          | 3             | 1         | 0.31          | 0.46         | <i>Anax parthenope</i>           | ODOPL134-19       | 14.72          |
| Gomphidae        | <i>Stylurus flavipes</i>          | 1             | 1         | N/A           | 0            | <i>Onychogomphus forcipatus</i>  | ZPLOD562-20       | 15.99          |
| Lestidae         | <i>Chalcolestes parvidens</i>     | 5             | 2         | 0.06          | 0.15         | <i>Chalcolestes viridis</i>      | ZPLOD167-20       | 8.92           |
| Lestidae         | <i>Chalcolestes viridis</i>       | 12            | 2         | 0.25          | 0.77         | <i>Chalcolestes parvidens</i>    | ZPLOD143-20       | 8.92           |
| Lestidae         | <i>Lestes barbarus</i>            | 5             | 3         | 0             | 0            | <i>Lestes sponsa</i>             | PLSW061-20        | 12.04          |
| Lestidae         | <i>Lestes dryas</i>               | 3             | 1         | 0.05          | 0.15         | <i>Lestes sponsa</i>             | PLSW061-20        | 4.93           |
| Lestidae         | <i>Lestes macrostigma</i>         | 2             | 1         | 0.46          | 0.46         | <i>Lestes sponsa</i>             | TRDOD030-14       | 14.04          |
| Lestidae         | <i>Lestes sponsa</i>              | 10            | 3         | 0.19          | 0.33         | <i>Lestes dryas</i>              | PLSW057-20        | 4.93           |
| Lestidae         | <i>Lestes virens</i>              | 11            | 2         | 0.3           | 0.65         | <i>Lestes dryas</i>              | PLSW056-20        | 12.41          |

| Family          | Species                          | # individuals | countries | Mean Intra-Sp | Max Intra-Sp | Nearest Species                  | Nearest Neighbour | Distance to NN |
|-----------------|----------------------------------|---------------|-----------|---------------|--------------|----------------------------------|-------------------|----------------|
| Lestidae        | <i>Sympecma fusca</i>            | 11            | 1         | 0.25          | 1.08         | <i>Sympecma paedisca</i>         | GBEPT934-14       | 8.14           |
| Lestidae        | <i>Sympecma paedisca</i>         | 9             | 2         | 0.64          | 1.09         | <i>Sympecma fusca</i>            | GBODO158-18       | 8.14           |
| Libellulidae    | <i>Brachythemis impartita</i>    | 3             | 1         | 0             | 0            | <i>Leucorrhinia albifrons</i>    | EDF004-18         | 14.09          |
| Libellulidae    | <i>Crocothemis erythraea</i>     | 6             | 3         | 0.56          | 0.96         | <i>Leucorrhinia rubicunda</i>    | TRDOD013-14       | 13.8           |
| Libellulidae    | <i>Diplacodes lefebvrii</i>      | 2             | 1         | 0.46          | 0.46         | <i>Libellula quadrimaculata</i>  | FBAQU503-10       | 17.13          |
| Libellulidae    | <i>Leucorrhinia albifrons</i>    | 3             | 2         | 0             | 0            | <i>Leucorrhinia caudalis</i>     | EDF011-18         | 10.07          |
| Libellulidae    | <i>Leucorrhinia caudalis</i>     | 2             | 1         | 0             | 0            | <i>Leucorrhinia albifrons</i>    | EDF004-18         | 10.07          |
| Libellulidae    | <i>Leucorrhinia dubia</i>        | 12            | 3         | 0.17          | 0.65         | <i>Leucorrhinia rubicunda</i>    | TRDOD013-14       | 2.23           |
| Libellulidae    | <i>Leucorrhinia pectoralis</i>   | 6             | 3         | 0             | 0            | <i>Leucorrhinia dubia</i>        | FBAQU501-10       | 4.72           |
| Libellulidae    | <i>Leucorrhinia rubicunda</i>    | 1             | 1         | N/A           | 0            | <i>Leucorrhinia dubia</i>        | FBAQU501-10       | 2.23           |
| Libellulidae    | <i>Libellula depressa</i>        | 6             | 3         | 0             | 0            | <i>Libellula fulva</i>           | GBEPT944-14       | 12.84          |
| Libellulidae    | <i>Libellula fulva</i>           | 5             | 3         | 0.08          | 0.15         | <i>Libellula depressa</i>        | RODI027-20        | 12.84          |
| Libellulidae    | <i>Libellula quadrimaculata</i>  | 17            | 3         | 0.3           | 0.81         | <i>Orthetrum coerulescens</i>    | PLSW049-20        | 12.47          |
| Libellulidae    | <i>Orthetrum albistylum</i>      | 1             | 1         | N/A           | 0            | <i>Orthetrum cancellatum</i>     | PLSW029-20        | 5.92           |
| Libellulidae    | <i>Orthetrum brunneum</i>        | 5             | 2         | 0             | 0            | <i>Orthetrum nitidinerve</i>     | ZPLOD661-20       | 9.44           |
| Libellulidae    | <i>Orthetrum cancellatum</i>     | 9             | 2         | 0.78          | 1.55         | <i>Orthetrum albistylum</i>      | EDF010-18         | 5.92           |
| Libellulidae    | <i>Orthetrum chrysostigma</i>    | 1             | 1         | N/A           | 0            | <i>Orthetrum albistylum</i>      | EDF010-18         | 8.67           |
| Libellulidae    | <i>Orthetrum coerulescens</i>    | 10            | 3         | 0.35          | 1.39         | <i>Orthetrum brunneum</i>        | GBODO060-18       | 9.87           |
| Libellulidae    | <i>Orthetrum nitidinerve</i>     | 2             | 1         | 0             | 0            | <i>Orthetrum brunneum</i>        | GBODO060-18       | 9.44           |
| Libellulidae    | <i>Orthetrum trinacria</i>       | 3             | 1         | 0.93          | 1.39         | <i>Orthetrum cancellatum</i>     | PLSW029-20        | 12.11          |
| Libellulidae    | <i>Selysiothemis nigra</i>       | 3             | 1         | 0.31          | 0.46         | <i>Trithemis kirbyi</i>          | ZPLOD848-20       | 14.49          |
| Libellulidae    | <i>Sympetrum danae</i>           | 6             | 2         | 0             | 0            | <i>Sympetrum depressiusculum</i> | ZPLOD752-20       | 9.88           |
| Libellulidae    | <i>Sympetrum depressiusculum</i> | 2             | 1         | 0             | 0            | <i>Sympetrum danae</i>           | PLSW002-20        | 9.88           |
| Libellulidae    | <i>Sympetrum flaveolum</i>       | 3             | 1         | 0.51          | 0.77         | <i>Sympetrum sanguineum</i>      | PLSW068-20        | 12.76          |
| Libellulidae    | <i>Sympetrum fonscolombii</i>    | 5             | 2         | 0.26          | 0.48         | <i>Sympetrum depressiusculum</i> | ZPLOD752-20       | 14.47          |
| Libellulidae    | <i>Sympetrum meridionale</i>     | 1             | 1         | N/A           | 0            | <i>Sympetrum sanguineum</i>      | FBAQU518-10       | 9.65           |
| Libellulidae    | <i>Sympetrum pedemontanum</i>    | 2             | 1         | N/A           | 0            | <i>Sympetrum vulgatum</i>        | GBODO113-18       | 10.61          |
| Libellulidae    | <i>Sympetrum sanguineum</i>      | 6             | 2         | 0.44          | 0.8          | <i>Sympetrum meridionale</i>     | GBEPT950-14       | 9.65           |
| Libellulidae    | <i>Sympetrum striolatum</i>      | 6             | 2         | 0.23          | 0.46         | <i>Sympetrum vulgatum</i>        | GBODO113-18       | 9.63           |
| Libellulidae    | <i>Sympetrum vulgatum</i>        | 7             | 2         | 0.09          | 0.31         | <i>Sympetrum striolatum</i>      | ZMBN328-16        | 9.63           |
| Libellulidae    | <i>Trithemis annulata</i>        | 2             | 1         | 0.15          | 0.15         | <i>Trithemis kirbyi</i>          | ZPLOD848-20       | 11.56          |
| Libellulidae    | <i>Trithemis kirbyi</i>          | 2             | 1         | 0.62          | 0.62         | <i>Trithemis annulata</i>        | ZPLOD811-20       | 11.56          |
| Libellulidae    | <i>Zygonyx torridus</i>          | 1             | 1         | N/A           | 0            | <i>Libellula quadrimaculata</i>  | FBAQU503-10       | 17.59          |
| Platycnemididae | <i>Platycnemis pennipes</i>      | 10            | 3         | 0             | 0            | <i>Erythromma najas</i>          | FBAQU492-10       | 17.9           |
| Synthemistidae  | <i>Oxygastra curtisii</i>        | 1             | 1         | N/A           | 0            | <i>Orthetrum cancellatum</i>     | ODOPL128-19       | 14.71          |
