# Supplementary material for: Coverage and quality of DNA barcode references for Central and Northern European Odonata
Source: PeerJ journal article supplement (doi:10.7717/peerj.11192), 2021-05-03

# BOLD TaxonID Tree

Title : Tree Result - DS-ODOGER  
Date : 15-May-2020  
Data Type : Nucleotide  
Distance Model : Kimura 2 Parameter  
Marker : COI-5P  
Colourization : Barcode Cluster (BIN)

Label : Process ID  
Label : Taxon  
Label : Life Stage  
Label : Country  
Label : Province/State  
Label : Sequence Length

Filter : length > 200bp only  
Filter : exclude records flagged as misidentifications  
Filter : exclude records with stop codons  
Filter : exclude contaminants

Sequence Count : 697  
Species count : 103  
Genus count : 38  
Family count : 10  
Unidentified : 2

BIN Count : 96

5 %

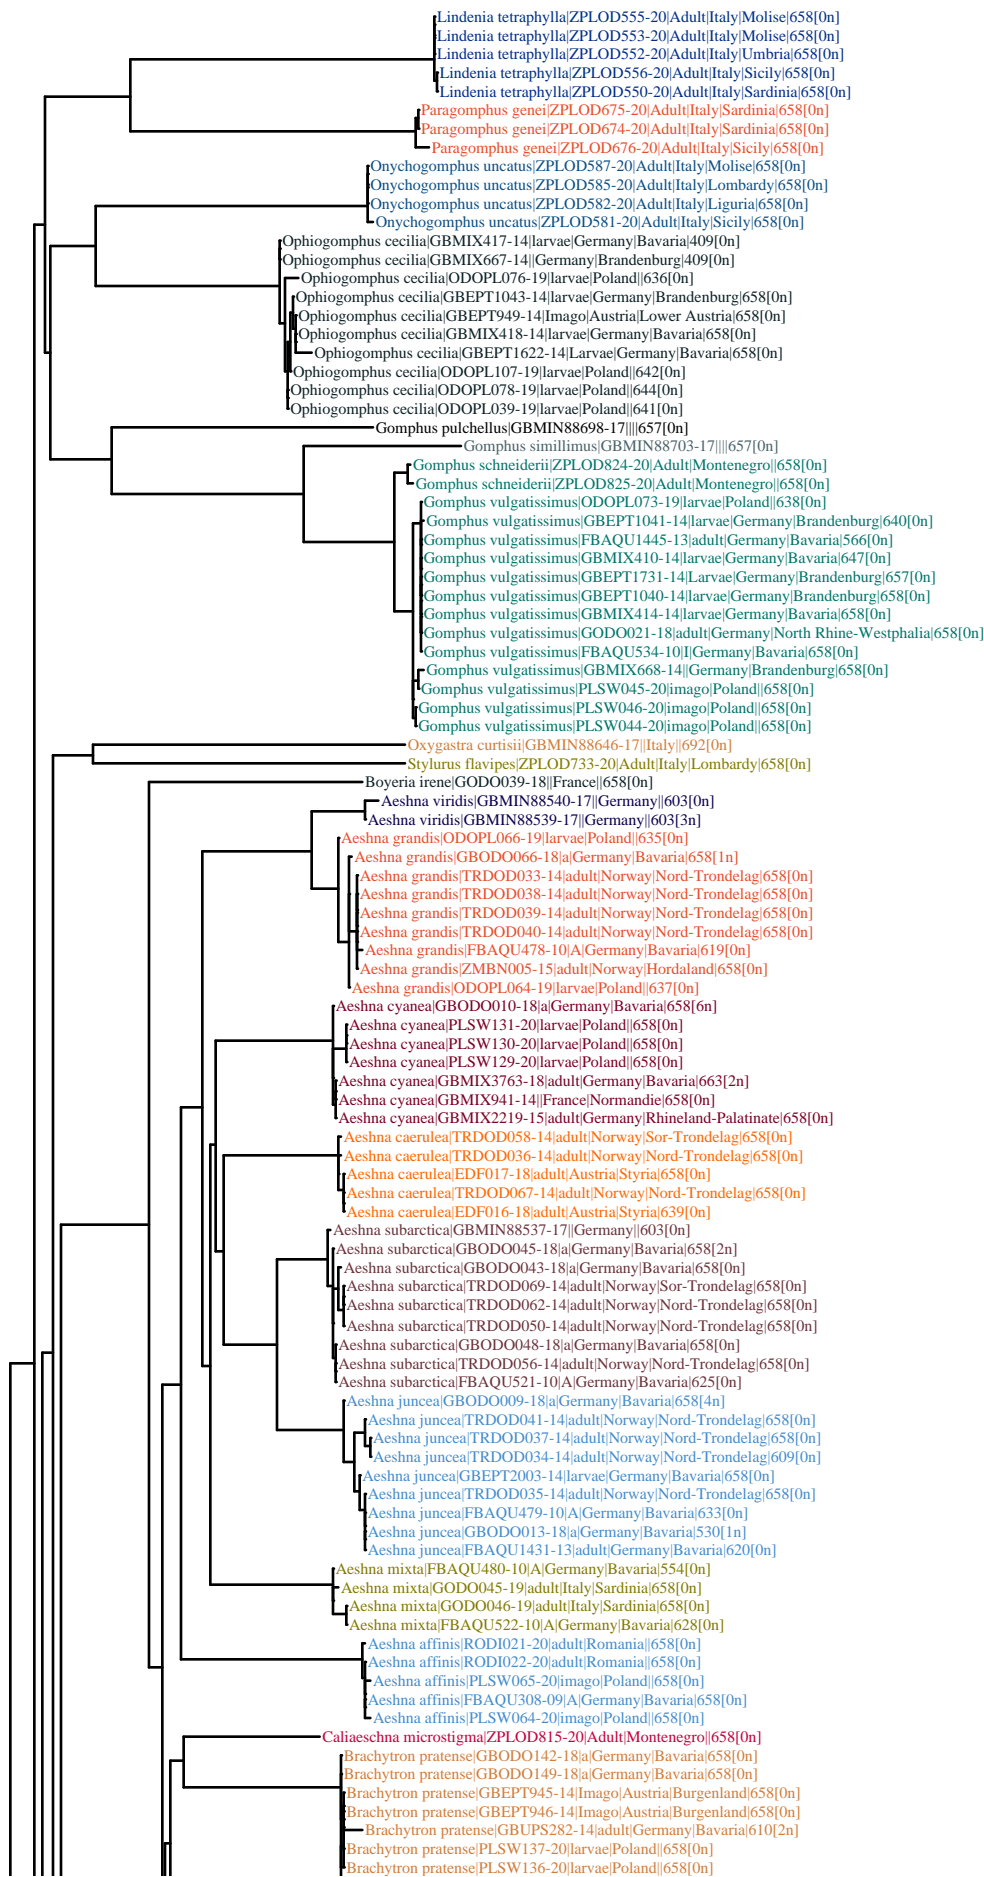

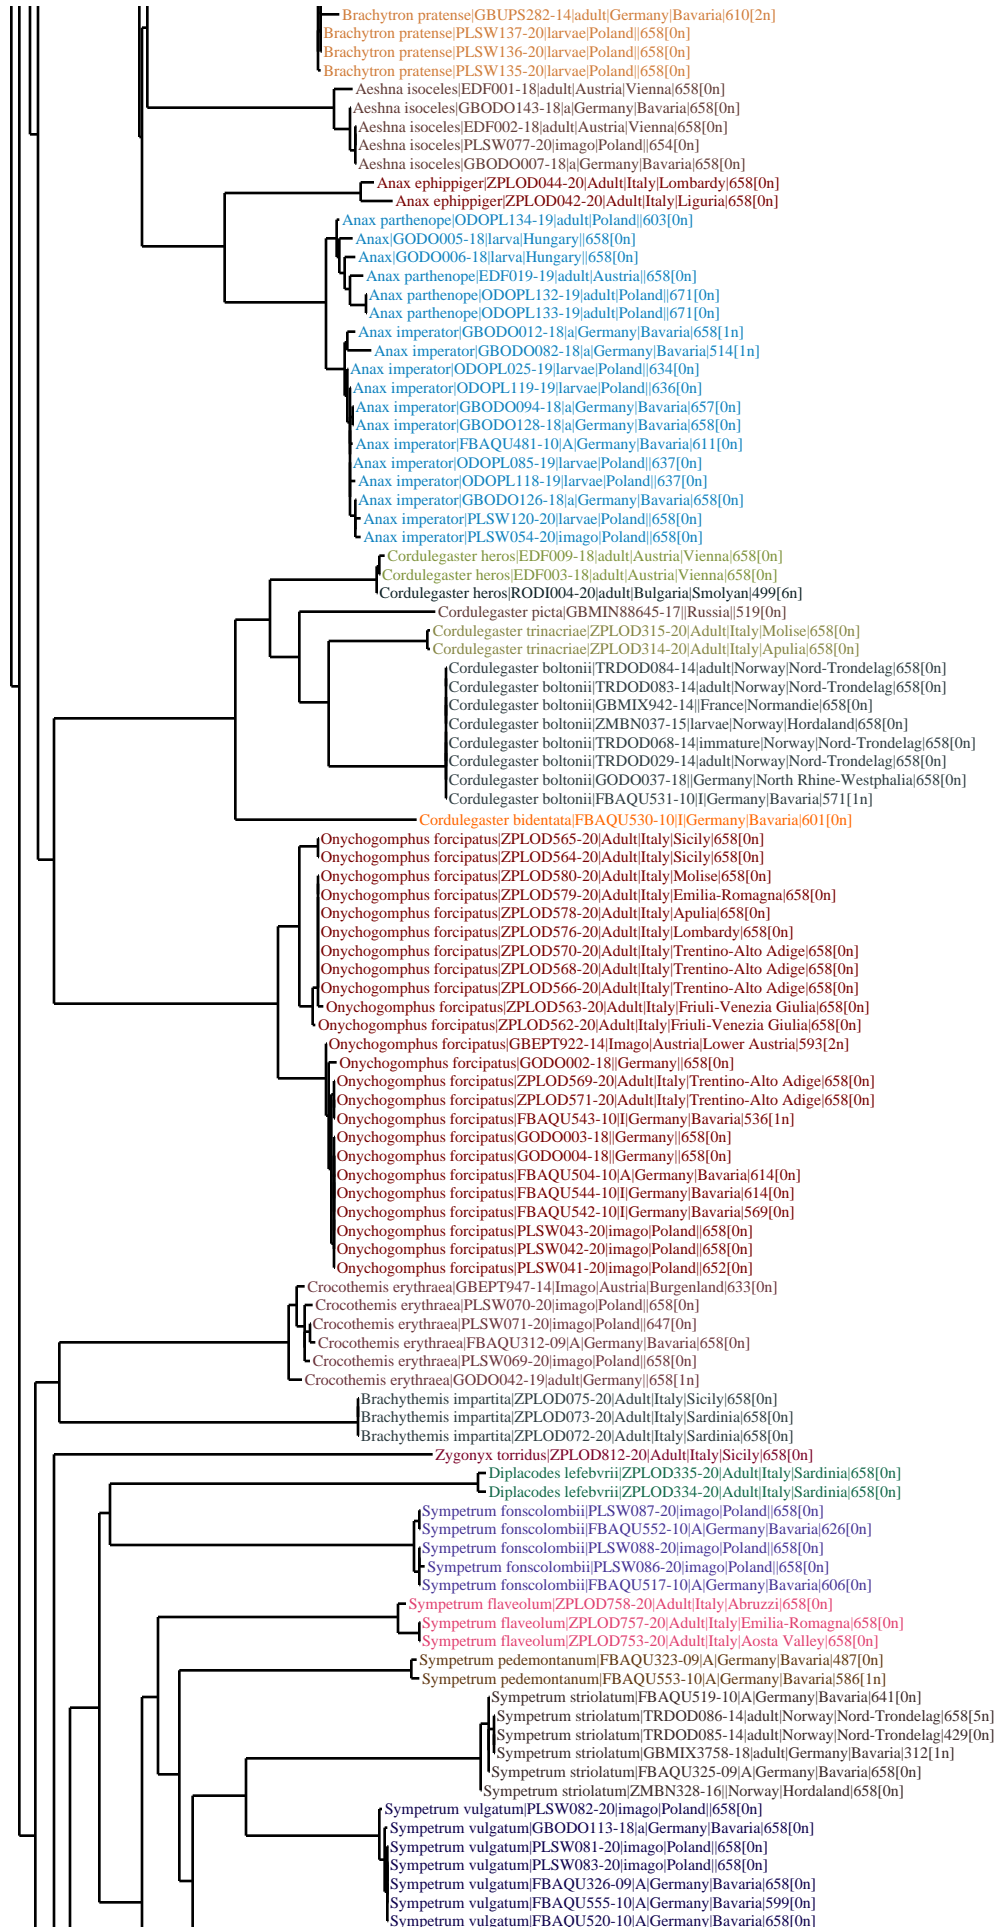

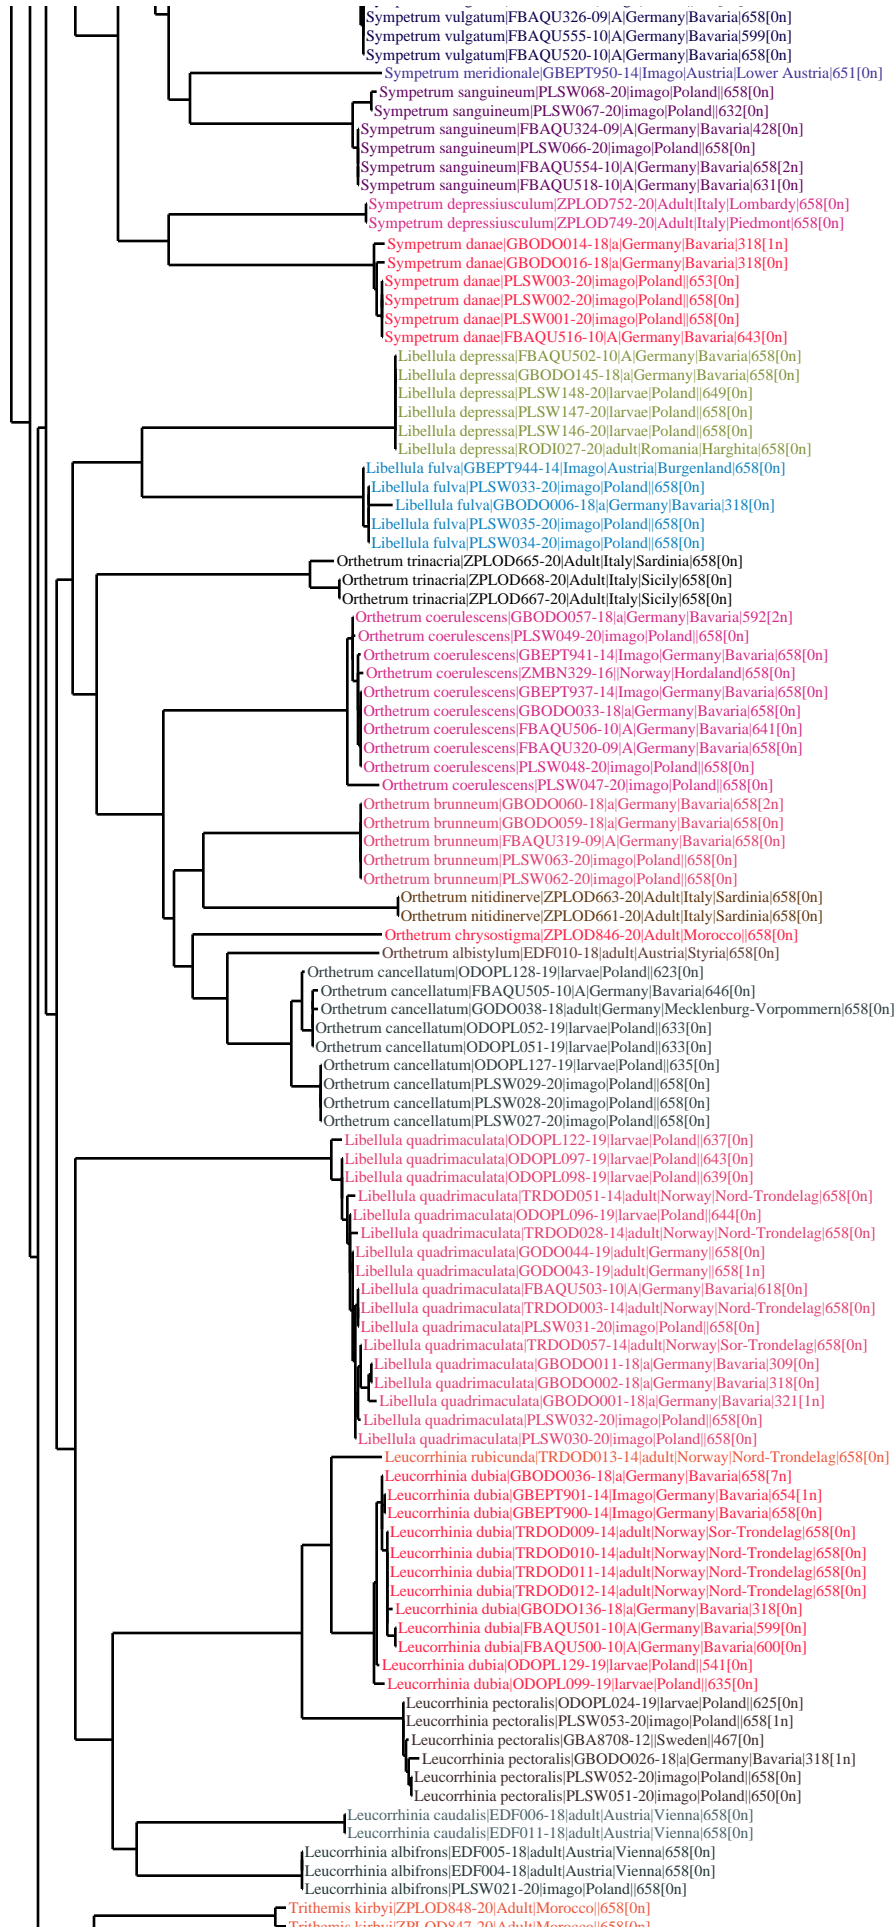

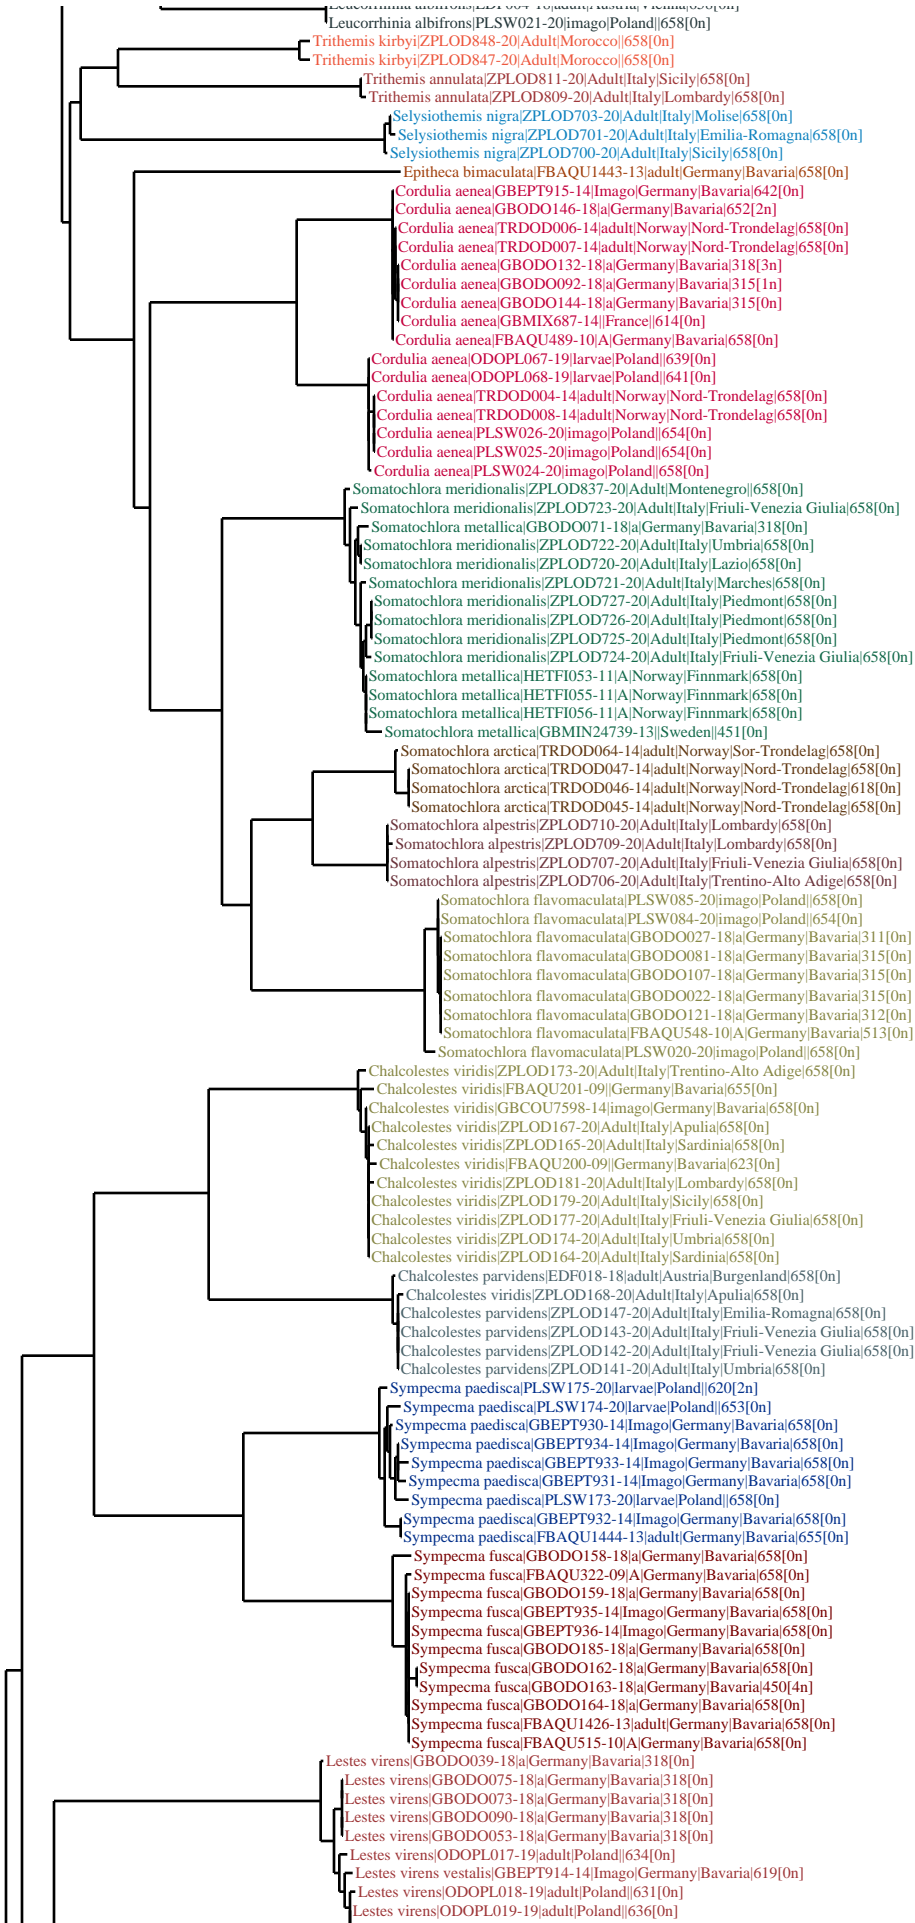

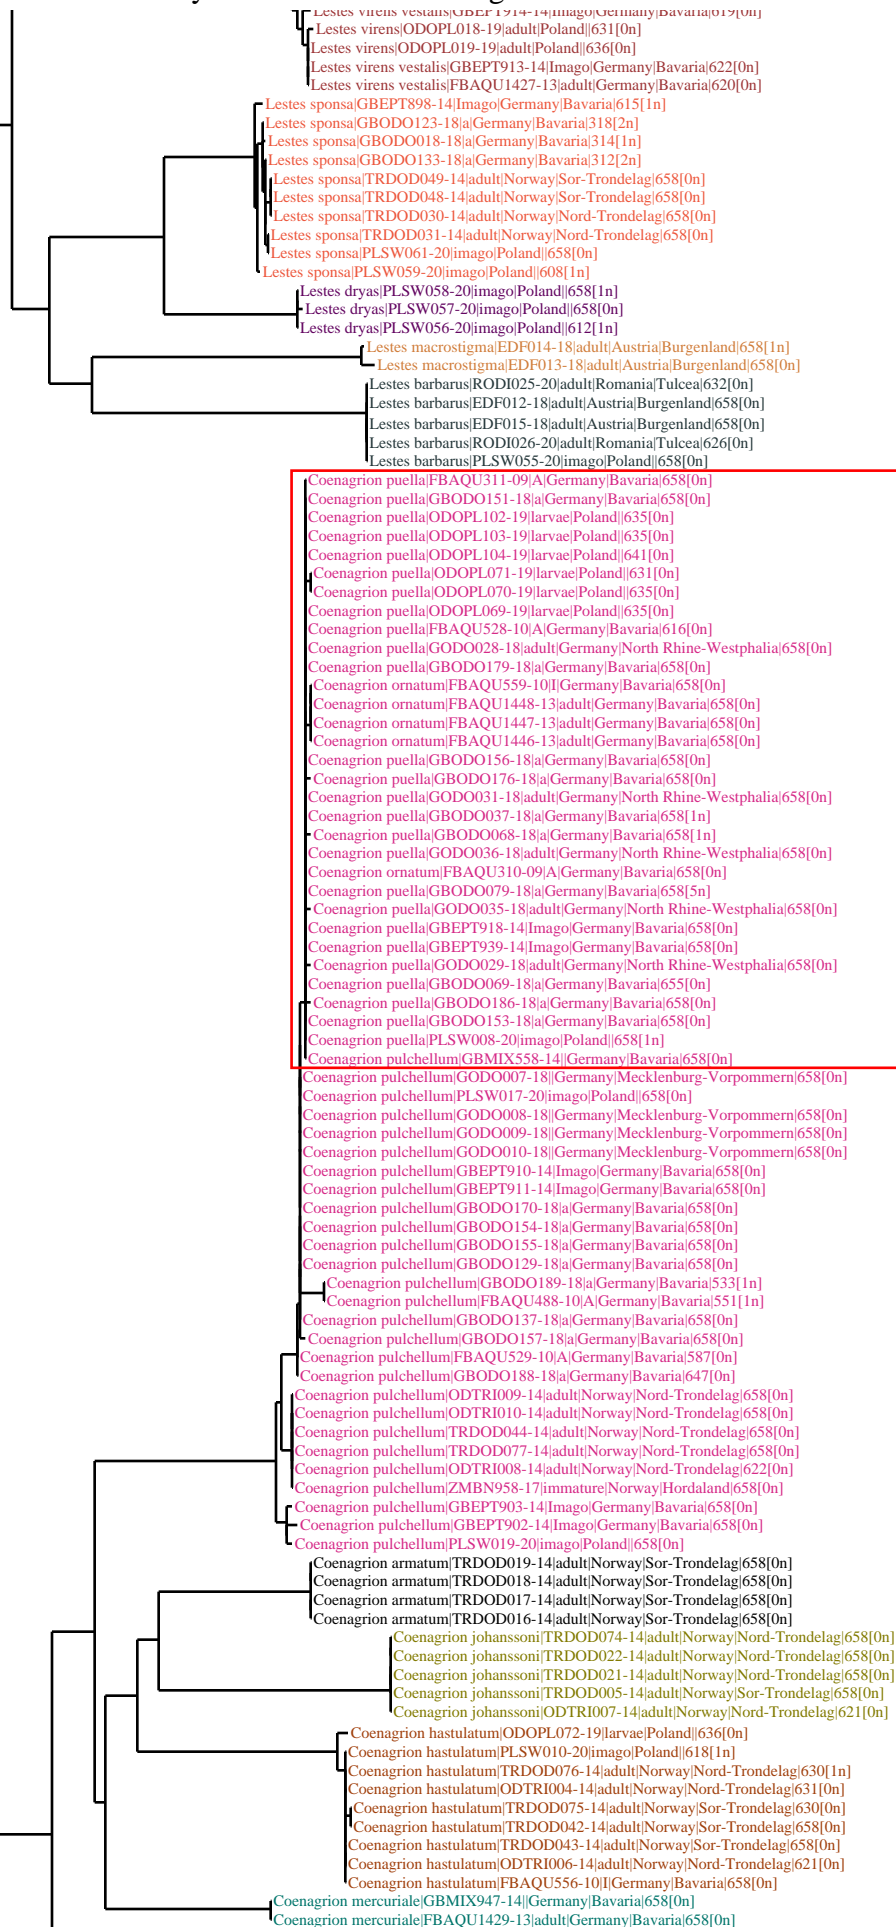

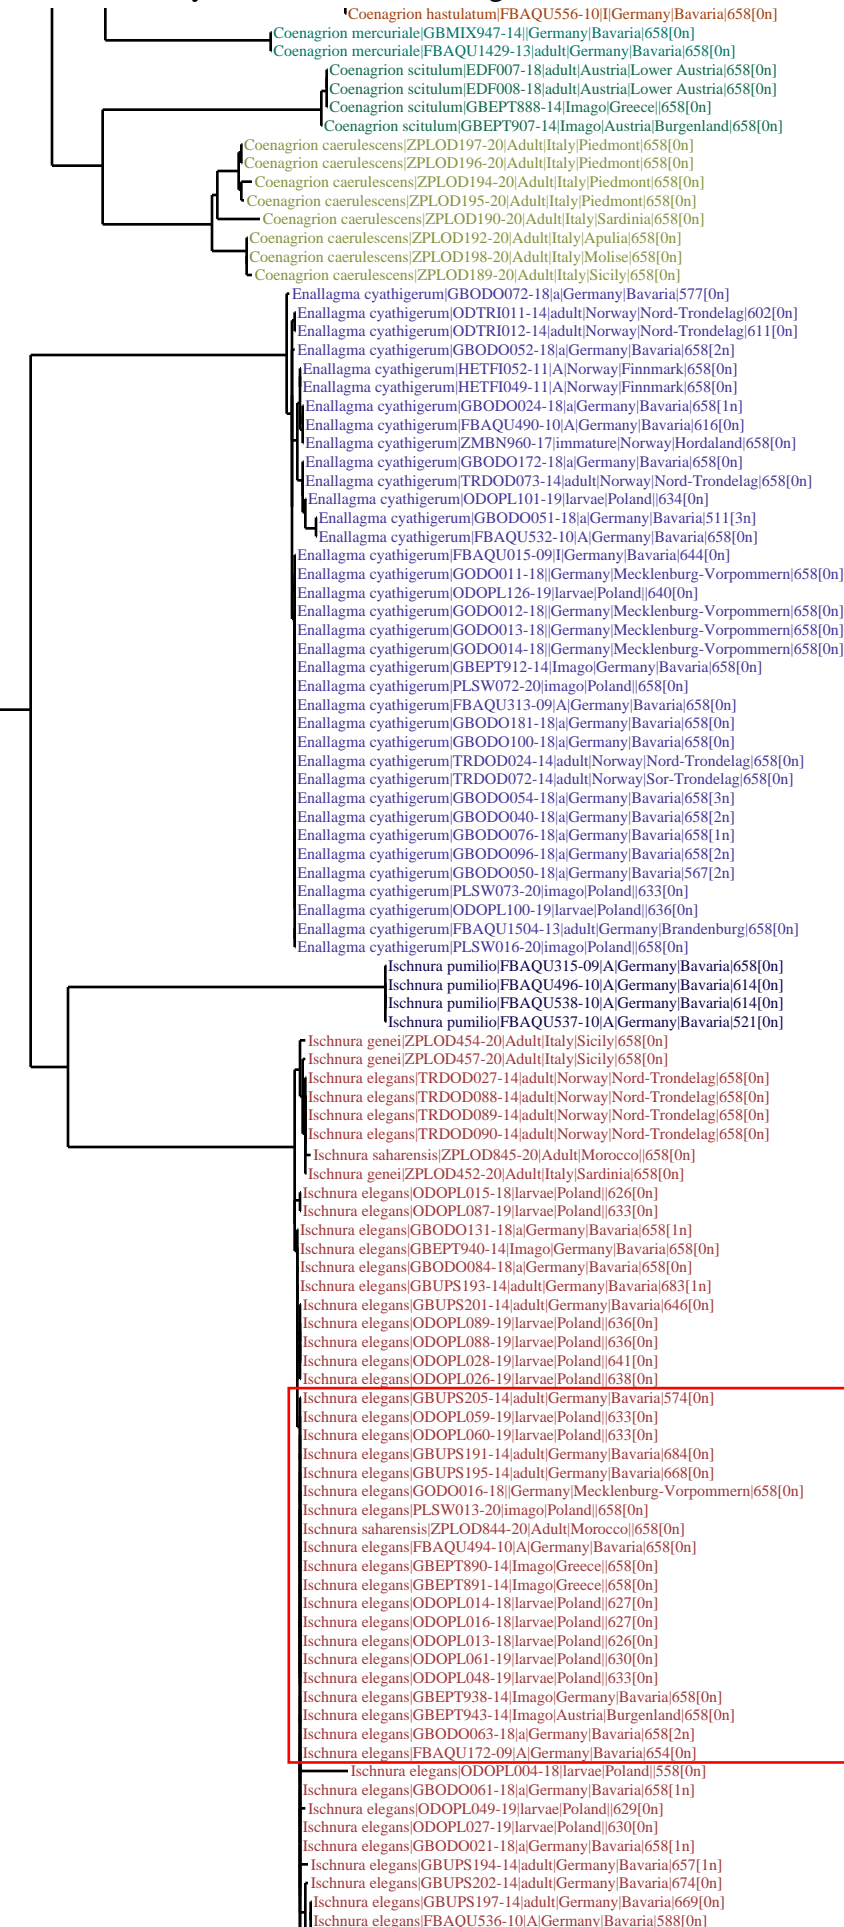

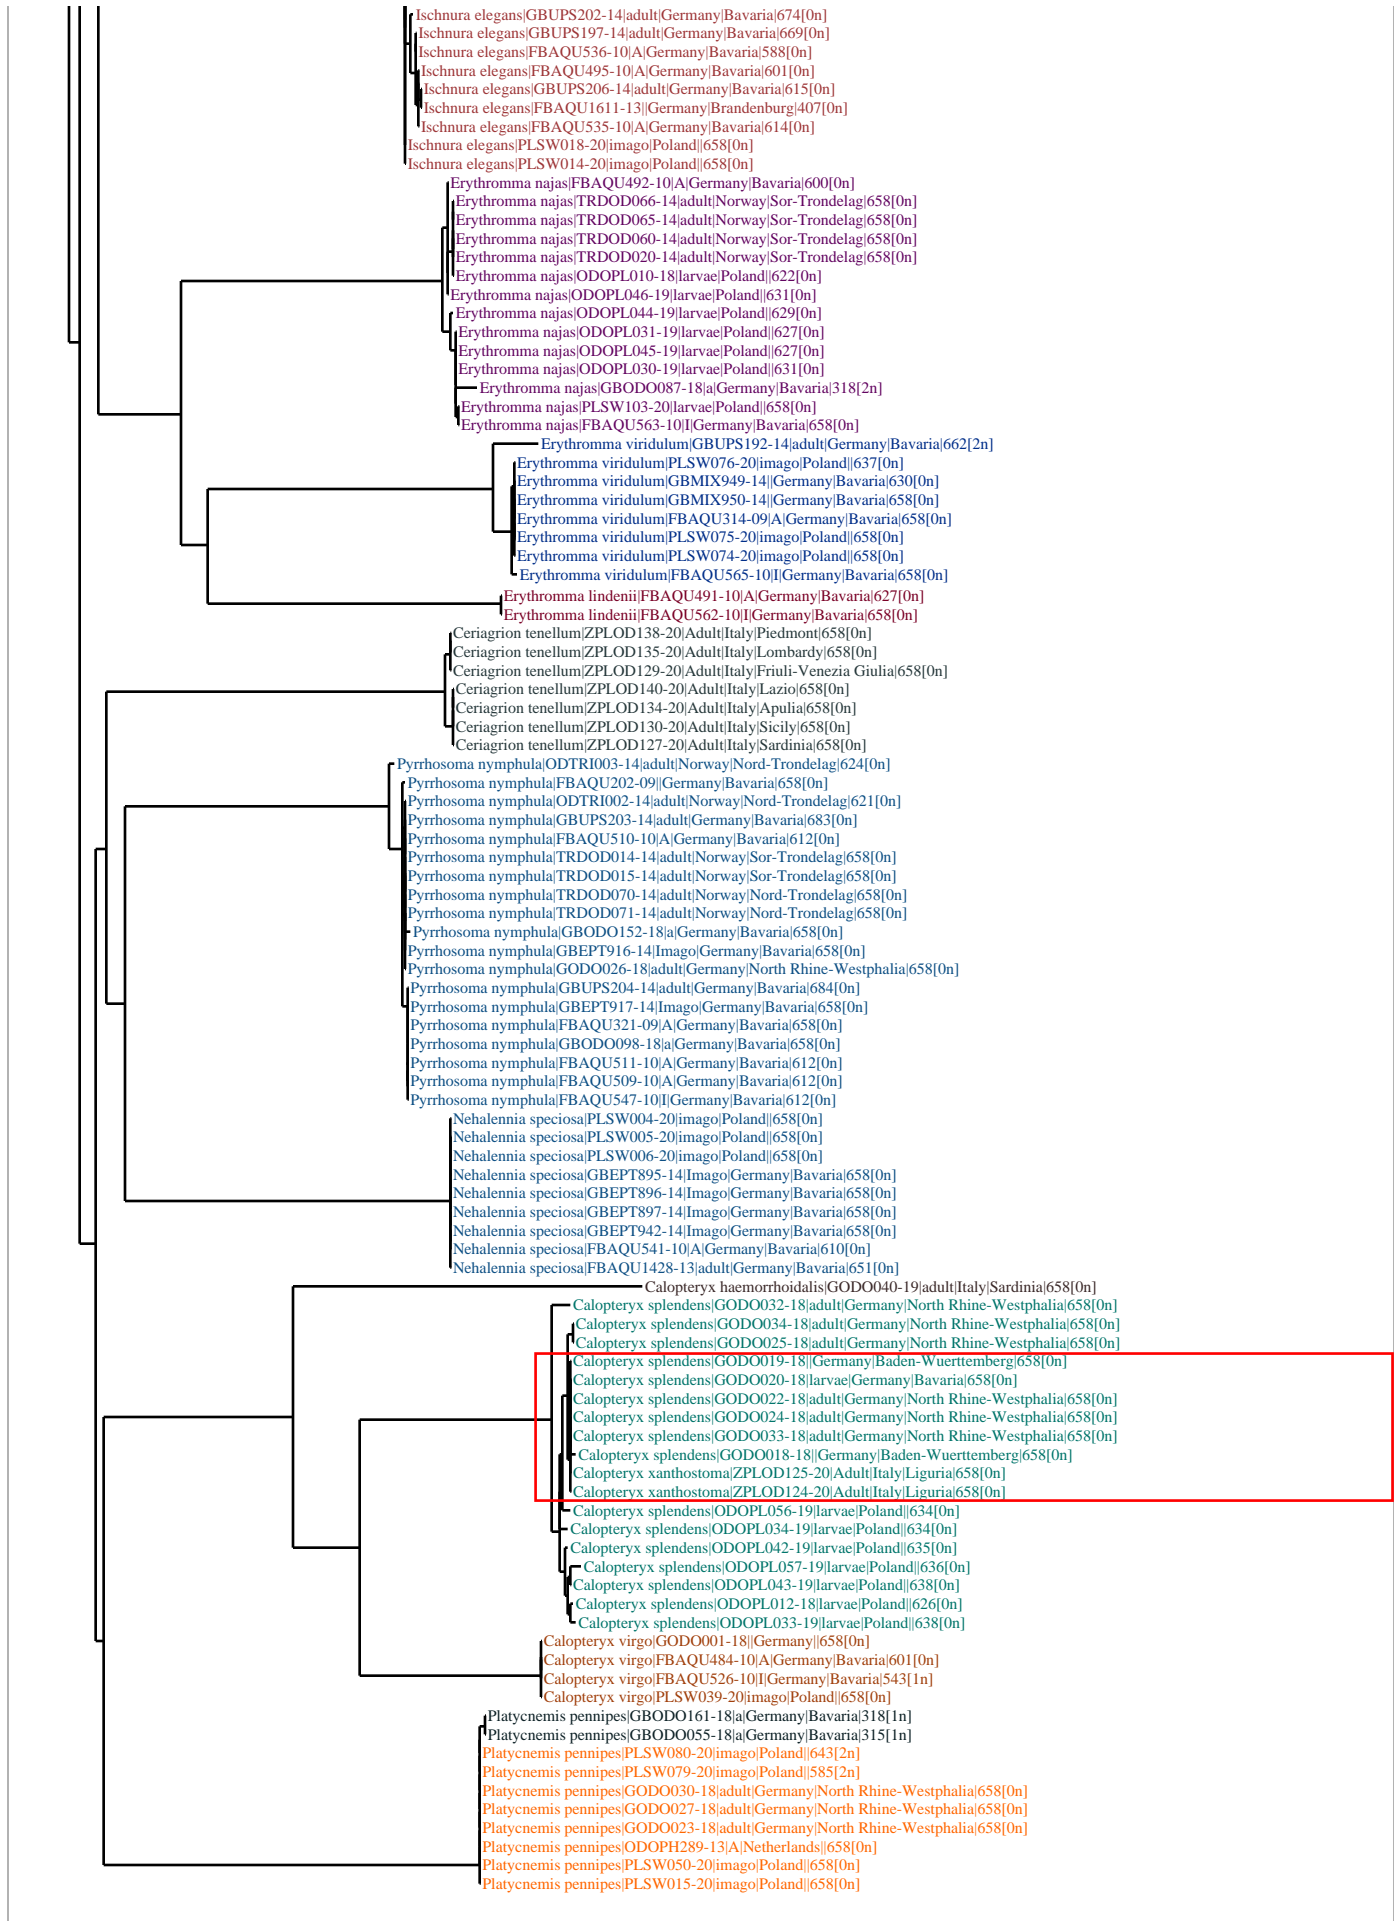

Supplement: suppl_file_S3.pdf [file suppl_file_S3.pdf]
