# Supplementary material for: Coverage and quality of DNA barcode references for Central and Northern European Odonata
Source: PeerJ journal article supplement (doi:10.7717/peerj.11192), 2021-05-03
Supplement: suppl_file_S4.pdf [file suppl_file_S4.pdf]

| Institute (sample origin)                                       | Institution (processing)     | PCR primers                                                                                                                                            | References                                                                                                      | Comment                                             |
|-----------------------------------------------------------------|------------------------------|--------------------------------------------------------------------------------------------------------------------------------------------------------|-----------------------------------------------------------------------------------------------------------------|-----------------------------------------------------|
| NHMW, Austria                                                   | NHMW                         | Tyr-Odo-F (5' – CTC CTA TAT AGA TTT ACA GTC T)<br>Leu-Odo-R (5' – CTT AAA TCC ATT GCA CTT TTC TGC C)                                                   | Haring et al. 2020                                                                                              | COI plus partial sections of the flanking tRNA gene |
| NHMW, Austria                                                   | NHMW                         | CO1-Odo-F5 (5' – TGC GAC RA TGR CTG TTT TC )<br>CO1-Odo-R6 (5' – TGC ACT TTT CTG CCA CAT TAA A )                                                       | Haring et al. 2020                                                                                              | COI plus partial sections of the flanking tRNA gene |
| NorBOL, Norway                                                  | CCDB                         | CLepFolF (5' – ATT CAA CCA ATC ATA AAG ATA TTG G)<br>CLepFolR (5' – TAA ACT TCT GGA TGT CCA AAA AAT CA)                                                | Ivanova et al. 2006 and<br>Hernández-Triana et al. 2014                                                         |                                                     |
| KFUG, Austria                                                   | KFUG                         | ODO_LCO1490d (5' – TTT CTA CWA ACC AYA AAG ATA TTG G)<br>ODO_HCO2198d (5' – TAA ACT TCW GGR TGT CCA AAR AAT CA)                                        | Dijkstra et al. 2014                                                                                            |                                                     |
| SNSB-ZSM, Germany                                               | CCDB                         | CLepFolF (5' – ATT CAA CCA ATC ATA AAG ATA TTG G)<br>CLepFolR (5' – TAA ACT TCT GGA TGT CCA AAA AAT CA)                                                | Ivanova et al. 2006 and<br>Hernández-Triana et al., 2014                                                        |                                                     |
| SNSB-ZSM, Germany                                               | CCDB                         | dgHCO2198 (5' – TAA ACT TCA GGG TGA CCA AAR AAY CA)<br>mlCOIintF (5' – GGW ACW GGW TGA ACW GTW TAY CCY CC)                                             | Meyer 2003 and Leray et al. 2013                                                                                | mini barcodes                                       |
| University of Lodz, Poland                                      | CCDB                         | OdoF1_t1 (5' – TGT AAA ACG ACG GCC AGT ATT CAA CHA ATC ATA ARG ATA TTG G)<br>OdoR1_t1 (5' – CAG GAA ACA GCT ATG ACT AAA CTT CTG GAT GYC CRA ARA AYC A) | Semotok, unpublished,<br>Source: BOLD Systems primer tails database; Galimberti et al. 2020; Rewicz et al. 2020 | includes M13 sequencing                             |
| University of Milano-Bicocca and private collection G. Assandri | University of Milano-Bicocca | OdoF1_t1 (5' – TGT AAA ACG ACG GCC AGT ATT CAA CHA ATC ATA ARG ATA TTG G)<br>OdoR1_t1 (5' – CAG GAA ACA GCT ATG ACT AAA CTT CTG GAT GYC CRA ARA AYC A) | Semotok, unpublished,<br>Source: BOLD Systems primer tails database; Galimberti et al. 2020; Rewicz et al. 2020 | includes M13 sequencing                             |
| University of Milano-Bicocca and private collection G. Assandri | University of Milano-Bicocca | ODO_LCO1490d (5' – TTT CTA CWA ACC AYA AAG ATA TTG G)<br>ODO_HCO2198d (5' – TAA ACT TCW GGR TGT CCA AAR AAT CA)                                        | Dijkstra et al. 2014                                                                                            |                                                     |
| ZFMK, Germany                                                   | GBOL at ZFMK                 | LCO1490-JJ (5' – CHA CWA AYC ATA AAG ATA TYG G)<br>HCO2198-JJ (5' – AWA CTT CVG GRT GVC CAA ARA ATC A)                                                 | Astrin et al. 2016                                                                                              |                                                     |
